1

2 **Title:** Rapid and iterative genome editing in the zoonotic malaria parasite *Plasmodium*

3 *knowlesi*: New tools for *P. vivax* research

4

5 Franziska Mohring<sup>1</sup>, Melissa N. Hart<sup>1</sup>, Thomas A. Rawlinson<sup>2</sup>, Ryan Henrici<sup>1</sup>, James A. Charleston<sup>1</sup>,

6 Ernest Diez Benavente<sup>1</sup>, Avnish Patel<sup>1</sup>, Joanna Hall<sup>3</sup>, Neil Almond<sup>3</sup>, Susana Campino<sup>1</sup>, Taane G.

7 Clark<sup>1</sup>, Colin J. Sutherland<sup>1</sup>, David A. Baker<sup>1</sup>, Simon J. Draper<sup>2</sup>, Robert W. Moon<sup>1\*</sup>

8

9 <sup>1</sup>Faculty of Infectious and Tropical Diseases, London School of Hygiene & Tropical Medicine, London

10 WC1E 7HT, United Kingdom

11 <sup>2</sup>The Jenner Institute, University of Oxford, Oxford, OX3 7DQ, United Kingdom;

12 <sup>3</sup>Division of Infectious Disease Diagnostics, National Institute for Biological Standards and Control,

13 Health Protection Agency, Hertfordshire EN6 3QG, United Kingdom;

14 \* Corresponding author: Robert W. Moon, London School of Hygiene & Tropical Medicine, London

15 WC1E 7HT, Phone: +44 207272743, Email: [Rob.Moon@lshtm.ac.uk](mailto:Rob.Moon@lshtm.ac.uk)

16

17 **Keywords:** *Plasmodium knowlesi*, CRISPR-Cas9, Duffy binding protein, invasion, vaccine,

18 *Plasmodium vivax*, genome-editing

19 **Abstract**

20 Tackling relapsing *Plasmodium vivax* and zoonotic *Plasmodium knowlesi* infections is critical to  
21 reducing malaria incidence and mortality worldwide. Understanding the biology of these important and  
22 related parasites was previously constrained by the lack of robust molecular and genetic approaches.  
23 Here, we establish CRISPR-Cas9 genome editing in a culture-adapted *P. knowlesi* strain and define  
24 parameters for optimal homology-driven repair. We establish a scalable protocol for the production of  
25 repair templates by PCR and demonstrate the flexibility of the system by tagging proteins with distinct  
26 cellular localisations. Using iterative rounds of genome-editing we generate a transgenic line expressing  
27 *P. vivax* Duffy binding protein (PvDBP), a lead vaccine candidate. We demonstrate that PvDBP plays  
28 no role in reticulocyte restriction but can alter the macaque/human host cell tropism of *P. knowlesi*.  
29 Critically, antibodies raised against the *P. vivax* antigen potently inhibit proliferation of this strain,  
30 providing an invaluable tool to support vaccine development.

31

32

33

34 **Main Text:**

35 **Introduction:**

36 Malaria remains a serious health burden globally, with over 216 million cases annually (1). *Plasmodium*  
37 *falciparum* is responsible for 99 % of estimated malaria cases in sub-Saharan Africa. Outside Africa, *P.*  
38 *vivax* is the predominant parasite and causes ~7.4 million clinical cases annually (1). Despite extensive  
39 efforts, in 2016 the number of malaria cases were on the rise again for the first time in several years.

40 Achieving global malaria eradication requires new tools and approaches for addressing emerging drug  
41 resistance, relapsing *P. vivax* infections, and emerging zoonotic *P. knowlesi* infections, which represent  
42 significant causes of severe disease and death (2).

43 Although *P. vivax* displays some distinctive features to *P. knowlesi*, including the formation of latent  
44 hypnozoites stages in the liver and restriction to reticulocytes in the blood (3), the two parasites are  
45 closely related, occupying a separate simian parasite clade to *P. falciparum* (4) Host cell invasion by *P.*  
46 *vivax* and *P. knowlesi* relies on the Duffy binding proteins (DBP) PvDBP and PkDBP $\alpha$ , respectively,  
47 both ligands for human red blood cell (RBC) Duffy antigen/receptor for chemokines (DARC) (5-8).

48 The critical binding motif of the ligands is the cysteine-rich region 2 (DBP-RII), with ~70 % identity  
49 between PkDBP $\alpha$  and PvDBP (9). Despite their similarity, PvDBP has also been implicated in both *P.*

50 *vivax* reticulocyte restriction (10) and as a host tropism factor preventing *P. vivax* from infecting

51 macaques (11). PvDBP-RII is also the leading blood stage vaccine candidate for *P. vivax* (12-14), with  
52 antibodies targeting PvDBP-RII blocking parasite invasion in ex vivo *P. vivax* assays (15). *P. knowlesi*

53 additionally contains two PkDBP $\alpha$  paralogues, namely DBP $\beta$  and DBP $\gamma$  which share high levels of

54 amino acid identity (68-88 %) to PkDBP $\alpha$  but bind to distinct receptors via N-glycolylneuraminic acid -  
55 a sialic acid found on the surface of macaque RBCs, but absent from human RBCs (16).

56 Due to the lack of a long-term in vitro culture system for *P. vivax*, vaccine development currently relies

57 on recombinant protein assays, or low throughput ex vivo studies, primate infections or controlled

58 human malaria infections (15, 17-19). Thus, higher throughput parasitological assays to assess antisera

59 and antigens, prior to escalation to in vivo work, are desperately needed. The evolutionary similarity

60 between *P. vivax* and *P. knowlesi* means the adaptation of *P. knowlesi* to long-term culture in human

61 RBCs (20, 21) provides unique opportunities to study DARC-dependent invasion processes in both

62 species. While adaptation of the CRISPR-Cas9 genome editing system to the most prevalent malaria  
63 parasite, *P. falciparum* (22), provided a powerful tool of studying parasite biology, scalable approaches  
64 for *P. falciparum* remain constrained by inefficient transfection and very high genome AT-content  
65 (averaging 80.6 %) (23). *P. knowlesi* offers significant experimental advantages over *P. falciparum*  
66 including a more balanced genome AT-content of 62.5 % and orders-of-magnitude-more-efficient  
67 transgenesis (20, 24, 25).  
68 Here, we establish CRISPR-Cas9 genome editing in *P. knowlesi*. Using an optimised and scalable PCR-  
69 based approach for generating targeting constructs we define critical parameters determining effective  
70 genome editing and apply the technique to introduce epitope/fluorescent protein tags to a variety of  
71 proteins with distinct cellular locations. We then use these tools to replace the *P. knowlesi* PkDBPa  
72 gene with its PvDBP orthologue, and delete the *P. knowlesi* DBP paralogues to create a transgenic *P.*  
73 *knowlesi* line reliant on the PvDBP protein for invasion of RBCs. The additional deletion of the PkDBP  
74 paralogues not only excludes interference through antibody cross-reactivity during growth inhibition  
75 assays, but also allows us to demonstrate that, in contrast to previous findings (10), PvDBP plays no  
76 role in reticulocyte restriction and has an effect on macaque/human host cell tropism. Finally, we show  
77 that antibodies raised against the *P. vivax* antigen are potent inhibitors of *P. knowlesi*/PvDBP  
78 transgenic parasites, providing an invaluable tool to support *P. vivax* vaccine development. Thus, we  
79 have developed a robust and flexible system for genome editing in an important human malaria parasite  
80 and generated essential new tools to accelerate both basic and applied malaria research.

81

## 82 **Results**

### 83 **Homology mediated CRISPR-Cas9 genome editing is highly efficient in *P. knowlesi***

84 *Plasmodium* parasites lack a canonical non-homologous end joining pathway, instead relying almost  
85 exclusively on homology-directed repair of double-stranded breaks (DSBs) (26), such as those  
86 introduced by the Cas9 endonuclease. Effective CRISPR-Cas9 genome editing of malaria parasites  
87 therefore requires expression cassettes for the guide RNA and the Cas9 nuclease, and a DSB repair  
88 template (donor DNA) containing the desired change, flanked by two regions of homology to the  
89 genomic target. Whilst a variety of approaches have been used in *P. falciparum*, many embed these

90 elements into two plasmids, each expressing a different drug-selectable marker (22, 27-30). This allows  
91 for selection of very rare events, but complicates construct design and is not ideal for multiple  
92 modifications of a given line – as both selectable markers must then be recycled. As transfection  
93 efficiency is significantly higher in *P. knowlesi* than *P. falciparum* (24), we reasoned that we may be  
94 able to use a single positive drug selectable marker to cover all the required components for editing.  
95 Pairing the guide and Cas9 cassette on a single “suicide” plasmid (29) with positive and negative  
96 selection cassettes would allow for indirect selection of a separate plasmid containing the repair  
97 template, as only parasites that took up the repair template as well as the Cas9 plasmid would be able to  
98 repair the DSB. Supporting this approach, co-transfection of plasmids expressing eGFP or mCherry  
99 revealed that ~30 % of *P. knowlesi* parasites took up both plasmids, although the proportion expressing  
100 both declined rapidly in the following days (S1 Figure). Our two-plasmid CRISPR-Cas9 system  
101 comprises one plasmid (pCas/sg) that provides Cas9, sgRNA (driven by the PkU6 promoter) and a  
102 hDHFR-yFCU fusion product for positive/negative selection, and a second plasmid (pDonor) providing  
103 the donor DNA with homology regions (HRs) flanking the DSB for repair by homologous  
104 recombination. To test this system, we designed constructs to integrate an eGFP expression cassette into  
105 the non-essential *p230p* locus (Figure 1A). A 20 bp guide sequence targeting a seed sequence upstream  
106 of a protospacer adjacent motif (PAM) within the *p230p* was cloned into pCas/sg (pCas/sg\_*p230p*), and  
107 a repair template plasmid was synthesized by including an eGFP expression cassette flanked by 400 bp  
108 HRs targeting either side of the PAM sequence (pDonor\_*p230p*). Both plasmids (each 20 µg) were  
109 combined and introduced into *P. knowlesi* schizonts via electroporation (20) along with control  
110 transfections (pCas9/sg without guide sequence and repair template). To simplify synchronisation of  
111 parasites, the transfection procedure was altered to additionally include a 2-hour incubation of purified  
112 schizonts with 1 µM of the schizont egress inhibitor compound 2, immediately prior to transfection.  
113 This compound reversibly inhibits the cGMP-dependent protein kinase (PKG) (31) and facilitates  
114 accumulation of the fully segmented forms required for transfection. Parasites were placed under  
115 selection with pyrimethamine for 5 days after transfection and successful integration monitored by  
116 PCR. Correct integration at the *p230p* locus was detectable by PCR within 3 days of transfection and  
117 only low levels of wild type DNA was detectable after day 11 (Figure 1B). Expression of eGFP was

118 confirmed by live microscopy (Figure 1C). The eGFP positivity rate was calculated the day after  
119 transfection (day 1), to evaluate transfection efficiency ( $8.4 \% \pm 2.1$  SD). The eGFP positivity was then  
120 assessed again once parasites reached 0.5 % parasitemia (day 12), indicating 83.3 % ( $\pm 1.8$  SD) of the  
121 parasites had integrated the construct (Figure 1D). Parasites transfected with pCas/sg\_ *p230p* without  
122 providing pDonor\_ *p230p* were visible in culture several days after the integrated lines. An intact guide  
123 and PAM site was detected in these parasites, suggesting that a small population of parasites did not  
124 form DSB. Parasites transfected with pCas/sg without a cloned sgRNA appeared in culture within a few  
125 days after transfection, with comparable growth rates to the eGFP plasmid, suggesting the Cas9  
126 expression without a targeting sgRNA is not toxic (Figure 1E). Integrated lines were grown for one  
127 week before negative selection with 5-Fluorocytosine and subsequent limiting dilution cloning. Clones  
128 were identified using a plaque-based assay (S1B Figure) previously used for *P. falciparum* (32), and  
129 10/10 genotyped clones harboured correctly integrated, markerless eGFP (Figure 1F).

130 **A three-step PCR method enables rapid, cloning-free generation of donor constructs**

131 *P. knowlesi* readily accepts linearised plasmids for homologous recombination (20, 25, 33), so we next  
132 tested whether we could use a PCR-based approach for scalable generation of repair templates. As no  
133 selectable marker is used within the repair template, this could be easily produced by using PCR to fuse  
134 5' and 3' HRs with the region containing the desired insertion, dispensing with the need for a plasmid  
135 back-bone. Modifying a method used for homologous recombination in *P. berghei* (34), we developed a  
136 three-step PCR scheme which first amplified the eGFP cassette and 400 bp HRs with eGFP cassette  
137 adaptors separately, with the second and third reactions fusing each HR to the eGFP cassette in turn  
138 (Figure 2A). The addition of nested primers for the second and third PCR step removed background  
139 bands and improved robustness. The final PCR construct (HR1-eGFPcassette-HR2) was transfected  
140 along with the pCas9/sg\_p230p plasmid, and resultant parasite lines demonstrated integration by PCR  
141 (Figure 2B), and an eGFP positivity rate of 74 % ( $\pm$  8 SD), similar to that seen for the pDonor\_p230p  
142 plasmid (Figure 2C). The use of a high-fidelity, high-processivity polymerase for the construct  
143 production allowed each reaction to be completed in 40-90 minutes, thus providing a rapid method for  
144 generating repair templates.

145

146 **Longer HRs increase the integration efficiency and offsets DSB distance efficiency loss**

147 We next used this PCR approach to investigate the optimal parameters and limits of the Cas9 system in  
148 *P. knowlesi*. Varying the length of HRs targeting the same p230p locus (Figure 2D), allowed us to  
149 determine the effect on integration efficiency as well as the size limits of the PCR approach. The largest  
150 construct generated in this way was 6.1 kb in length (2x 1.6 kb HRs flanking the 2.9 kb eGFP  
151 expression cassette). Attempts to generate a larger 9.3 kb construct (2x 3.2 kb HRs) failed during the  
152 final PCR step. PCR yields were lower for larger constructs, with the 6.1 kb construct yielding half that  
153 of the 3.7 kb construct. PCR repair templates with HRs ranging from 50-1600 bp generated single  
154 specific bands with exception of the 400 bp HRs which contained an additional lower band, due to a  
155 primer additionally annealing to a repeat region in HR1 (S2B Figure). The PCR constructs were  
156 transfected together with the pCas/sg\_p230p plasmid and integration efficiency monitored (Figure  
157 S2A). All 6 HRs lengths produced evidence of integration by PCR, but the efficiency rapidly declined

158 with shorter HR length (S2D Figure). Parasites transfected with 800 and 1600 bp HR constructs were  
159 the fastest to reach 1 % parasitemia on day 12 and 9 post transfection, respectively (Figure 2E). For the  
160 50 and 100 bp HR constructs no eGFP positive parasites were detected by fluorescence microscopy  
161 suggesting very low targeting efficiencies. Constructs with HRs >400 bp provided GFP positivity,  
162 ranging from 79 and 81 % (Figure 2F), which taken together with PCR yields and transfection recovery  
163 time suggest an optimal HR length of at least ~800 bp.

164  
165 To undertake large gene deletion or replacement experiments, HRs may need to be placed at a distance  
166 from the Cas9-induced DSB, and it is well known in other systems that efficiency rapidly declines with  
167 distance to DSB (35). In *P. falciparum* integration efficiencies decrease drastically with distance over  
168 250 bp from the PAM site (36). To determine how distance from DSB affected efficiency of  
169 integration, we used the same *p230p* PAM site and moved our 400 bp HRs varying distances away from  
170 the DSB, ranging from 0 - 5 kb (Figure 2G and S2D Figure). Whilst all transfections were PCR positive  
171 for integration and reached 1 % parasitemia at similar times (14-20 days) (S2D Figure and Figure 2H),  
172 the integration efficiency declined with distance from DSB. This decline was surprisingly small, with  
173 HRs placed even 5 kb away from either side of the DSB yielding a 14 % ( $\pm$  18 SD) integration  
174 efficiency (Figure 2I). Interestingly, we found that extending HR length to 800 bp restored integration  
175 efficiencies to 54.8 % ( $\pm$  8.7 SD) at a 5 kb distance from DSB (Figure 2I). Thus, HR length can directly  
176 offset efficiency losses due to distance from DSB and this system can readily remove genes at least as  
177 large as 10 kb in size from a single PAM site, accounting for ~98 % of genes in the *P. knowlesi* genome  
178 (37).

179  
180 **Cas9-based PCR constructs enable rapid and flexible gene tagging in *P. knowlesi***  
181 Having demonstrated consistent performance of an sgRNA sequence in the sgRNA/Cas9 suicide vector  
182 and PCR constructs for targeting a single control locus, we next sought to determine how robust the  
183 system is for targeting a range of loci. We therefore used the PCR-based approach for fusion of  
184 fluorescent or epitope tags to proteins of interest (Figure 3A). For C-terminal tags, the PCR repair  
185 templates were generated by creating fusions of the tag with HRs targeting the 3' end of the gene and



186 the 3'UTR. Similarly, N-terminal tag repair templates were created by flanking the tag with HRs  
187 targeting the 5'UTR and 5'end of the coding region. In each case a PAM site was selected that crossed  
188 the stop codon (for C-terminal) or start codon (for N-terminal) such that integration of the tag alone,  
189 with no other exogenous sequence, was sufficient to disrupt the PAM site. For genes, such as the  
190 Chloroquine Resistance Transporter (CRT), where the PAM site preceded the stop codon, intervening  
191 sequences were recodonised when generating the 5'HR to disrupt the PAM site using silent mutations.  
192 We selected five genes with disparate subcellular locations and functions to test this approach: the  
193 micronemal protein apical membrane antigen 1 (AMA1) (38), rhoptry neck protein 2 (RON2) (39),  
194 inner membrane complex protein myosin A (MyoA) (40), digestive vacuole membrane protein involved  
195 in drug resistance CRT (41), and a protein involved in artemisinin resistance in cytoplasmic foci  
196 Kelch13 (K13) (42). A single sgRNA was selected for each, and repair templates were generated by  
197 fusion PCR to incorporate an eGFP, mCherry (both with 24 bp glycine linker) or a hemagglutinin (HA)  
198 tag (S3A-E Figure). An N-terminal tag was used for K13, as previous work in *P. falciparum* suggested  
199 that C-terminal tagging affected parasite growth (42), and C-terminal tags used for all the other targets.  
200 All lines grew up quickly after transfection, reaching 1 % after between 8 and 15 days, and PCR  
201 analysis indicated that correct integration had occurred (Figure 3B). Whilst it is, to our knowledge, the  
202 first time each of these proteins have been tagged in *P. knowlesi*, all demonstrated localisation patterns  
203 were consistent with previous reports for *P. falciparum* (Figure 3C). AMA1, MyoA and K13 showed  
204 clear bands at the expected size on western blots. The CRT-eGFP fusion protein showed a band at ~50  
205 kDa, in line with work in *P. falciparum* which showed CRT-eGFP migrates faster than its predicted size  
206 of 76 kDa (S3F Figure) (41). We were unable to visualise a band for RON2-HA most likely due to poor  
207 blotting transfer of this 240 kDa protein. Together, these results demonstrate that the fusion PCR  
208 approach can be used to tag *P. knowlesi* genes rapidly and robustly at a variety of loci. Analysis of  
209 equivalent *P. falciparum* loci revealed only 2/5 had suitably positioned PAM sites, and equivalent UTR  
210 regions had an average GC-content of only 11.8 % (36 % for *P. knowlesi*), suggesting a similar  
211 approach would have been more challenging in *P. falciparum* (Table S1).

212

213 **Transgenic *P. knowlesi* orthologue replacement lines provide surrogates for *P. vivax* vaccine**  
214 **development and DBP tropism studies**

215 Having demonstrated the utility of this technique for rapidly manipulating genes of interest, we next  
216 sought to use this system to study *P. vivax* biology. The orthologous RBC ligands PkDBP $\alpha$  and PvDBP,  
217 mediate host cell invasion by binding to the DARC receptor on human RBCs in *P. knowlesi* and *P.*  
218 *vivax*, respectively (5-8). PvDBP is currently the lead vaccine candidate for a *P. vivax* blood stage  
219 vaccine (12-14), thus *P. knowlesi* could provide an ideal surrogate for vaccine testing in the absence of  
220 a robust in vitro culture system for *P. vivax*. Whilst likely functionally equivalent, the DBP orthologues  
221 are antigenically distinct (~70 % amino acid identity in binding region II) so we used genome-editing  
222 tools to generate transgenic *P. knowlesi* parasites in which DARC binding is provided solely by PvDBP.  
223 We first carried out an orthologue replacement (OR) of the full-length PkDBP $\alpha$  with PvDBP in the *P.*  
224 *knowlesi* A1-H.1 line (PvDBP<sup>OR</sup>) – using a recodonised synthetic PvDBP gene flanked by HRs  
225 targeting the 5' and 3'UTRs of the PkDBP $\alpha$  gene (S4A Figure). Once integrated, this deletes the  
226 PkDBP $\alpha$  gene and places the PvDBP gene under control of the PkDBP $\alpha$  regulatory sequences, enabling  
227 a precisely matched expression profile. As a control we also exchanged PkDBP $\alpha$  with a recodonised  
228 PkDBP $\alpha$  gene (PkDBP $\alpha$ <sup>OR</sup>) using the same sgRNA (S4C Figure). Successful integration was readily  
229 achieved and limiting dilution cloning resulted in 100 % integrated clones for PkDBP $\alpha$ <sup>OR</sup> and 40 % for  
230 PvDBP<sup>OR</sup> (Figure 4A). The PkA1-H.1 line relies on the DARC receptor for invasion of human RBCs  
231 (20) and PkDBP $\alpha$  is required to mediate this interaction (7), thus the successful replacement indicates  
232 that the Pv orthologue can fully complement its role in DARC binding and parasite invasion.  
233 *P. knowlesi* contains two DBP $\alpha$  paralogues, DBP $\beta$  and DBP $\gamma$ , which are highly homologous at the  
234 nucleotide (91-93 % identity) and amino acid (68-88 % identity) levels, but are thought to bind to  
235 distinct sialic acid-modified receptors unique to macaque RBCs (16). The PkDBP $\alpha$  sgRNA was  
236 carefully designed to be distinct to equivalent DBP $\beta$  and DBP $\gamma$  target sequences (85 % identical to  
237 DBP $\gamma$  and 47.8 % to DBP $\beta$ ), because, as in other systems, off-target Cas9-induced DSBs are a major  
238 issue (43, 44). We therefore sequenced the four most similar target sequences, including one in DBP $\gamma$ ,  
239 in the PvDBP<sup>OR</sup> lines (Table S2) and did not detect any off-target mutations, suggesting that as for other  
240 malaria parasites (22) the absence of non-homologous end joining (26) ameliorates the potential for off-

241 target mutations. However, diagnostic PCRs for DBP $\beta$  failed, as well as PCRs in genes flanking the  
242 DBP $\beta$  locus. Whole genome sequencing revealed that in one of two independent PkDBP $\alpha^{OR}$  and  
243 PvDBP $^{OR}$  clones of ~44 kb truncation at one end of chromosome 14 had occurred (S5 Figure), which  
244 also harbours DBP $\beta$ , resulting in lines PkDBP $\alpha^{OR}/\Delta\beta$  and PvDBP $^{OR}/\Delta\beta$ . The loss of the ~44 kb of  
245 chromosome 14 is also present in parasites that have been transfected simultaneously with  
246 pCas/sg\_p230p, suggesting that the 44 kb deletion occurred in the A1-H.1 parental parasite line prior to  
247 transfection and was not an artefact caused by targeting DBP $\alpha$ . Similar spontaneous deletions have been  
248 reported previously, including ~ 66 kb loss at the other end of chromosome 14 in the *P. knowlesi* A1-C  
249 line maintained in cynomolgus macaque blood that included the invasion ligand NBPXa (33), and a  
250 deletion of DBP $\gamma$  in the PkYH1 line at the end of chromosome 13 (16). Furthermore, the PAM site of  
251 the DBP $\alpha$  targeting guide sequence is absent in DBP $\beta$  (S4C Figure) which makes it unlikely that the  
252 disruption of DBP $\beta$  was induced by Cas9 during DBP $\alpha$  targeting.

253 Having established accurate targeting of the PkDBP $\alpha$  locus, we investigated the role of the paralogues  
254 in human and macaque red cell invasion and whether they could interfere with inhibitory effects of test  
255 antibodies. We took advantage of the line with the spontaneous DBP $\beta$  loss and then used pCas/sg  
256 plasmid recycling to additionally delete the DBP $\gamma$  locus, generating PkDBP $\alpha^{OR}/\Delta\beta\Delta\gamma$  and  
257 PvDBP $^{OR}/\Delta\beta\Delta\gamma$ . The final PvDBP $^{OR}/\Delta\beta\Delta\gamma$  clonal line was subjected to whole genome sequencing to  
258 verify changes at all three loci, and this confirmed precise targeting of the PvDBP allele swap into the  
259 PkDBP $\alpha$  locus, and complete deletion of the DBP $\gamma$  open reading frame in the PkDBP  $\gamma$  locus (S5  
260 Figure).

261  
262 Analysis of the wild type line, and the four transgenic lines (PkDBP $\alpha^{OR}/\Delta\beta$ , PvDBP $^{OR}/\Delta\beta$ ,  
263 PkDBP $\alpha^{OR}/\Delta\beta\Delta\gamma$  and PvDBP $^{OR}/\Delta\beta\Delta\gamma$ ) revealed no difference in growth rate in human RBCs (Figure  
264 4B), confirming that the *P. vivax* protein was able to fully complement the role of its *P. knowlesi*  
265 orthologue, and PkDBP $\beta$  and  $\gamma$  proteins are dispensable for invasion of humans RBCs (16). To  
266 investigate how these modifications affect host tropism we compared the growth rates in human RBCs  
267 with growth rates in RBCs from the natural host of *P. knowlesi*, the long tailed macaque (*Macaca*  
268 *fascicularis*). Even human culture-adapted *P. knowlesi* retains a strong preference for macaque cells

269 (20, 21, 33) and it has been hypothesized that the additional invasion pathways provided by DBP $\beta$  and  
270 DBP $\gamma$  are in part responsible for the increased invasion efficiency in macaque RBCs (16). Interestingly,  
271 loss of DBP $\beta$  and DBP $\gamma$  in the PkDBP $\alpha^{OR}/\Delta\beta\Delta\gamma$  line did reduce parasite replication in macaque RBC  
272 (Figure 4B), with the lines retaining a macaque preference ratio (macaque fold growth/human fold  
273 growth) of 1.43, similar to both the wild type (1.26) and PkDBP $\alpha^{OR}/\Delta\beta$  (1.33). This demonstrates that  
274 both proteins are dispensable for invasion of macaque RBCs, and PkDBP $\alpha$  alone is sufficient to retain  
275 full invasion efficiency in macaque cells. Unlike *P. knowlesi*, *P. vivax* is unable to infect macaques, and  
276 sequence differences between the DARC receptor in the two hosts have been suggested to underlie this  
277 restriction (11). Whilst macaque invasion rates and host preference ratio (1.16) were unaffected for the  
278 PvDBP $^{OR}/\Delta\beta$  line, the additional deletion of DBP $\gamma$  in the PvDBP $^{OR}/\Delta\beta\Delta\gamma$  line resulted in a 40%  
279 reduction in macaque invasion rates (Figure 4B) which caused a shift to human RBC preference with a  
280 ratio of 0.75. This suggests that in the absence of redundant DBP pathways, PvDBP is less effective at  
281 facilitating invasion of macaque cells than of human cells, but nevertheless can support invasion of both  
282 host cell types.

283  
284 Growth inhibition activity (GIA) assays revealed that all lines remained equally susceptible to invasion  
285 inhibition by both an anti-DARC camelid nanobody CA111 (45) and a polyclonal  $\alpha$ PkMSP1<sub>19</sub> antibody  
286 (Figure 4C). In contrast, purified IgGs from polyclonal rabbit sera raised against PvDBP-RII,  
287 demonstrated low-level GIA activity for wild type and PkDBP $\alpha^{OR}/\Delta\beta\Delta\gamma$  lines (~30 % inhibition at 10  
288 mg/ml) but a significantly stronger GIA activity against the PvDBP $^{OR}$  and PvDBP $^{OR}/\Delta\beta\Delta\gamma$  lines,  
289 reaching a maximum inhibition of ~75 % at 10 mg/ml and around 50 % at 4 mg/ml (Figure 4 D-G).  
290 The PvDBP $^{OR}$  parasite lines could thus be readily inhibited by antibodies against the *P. vivax* protein  
291 and the PkDBP $\alpha$  orthologues  $\gamma$  and  $\beta$  appeared to play no interactive role. We thus have created a  
292 transgenic *P. knowlesi* model, modified at two separate loci which recapitulates the *P. vivax* DBP  
293 invasion pathway. This parasite line is a vital new tool in PvDBP vaccine development.

294

295

296 **Discussion**

297 In this work, we adapt CRISPR-Cas9 genome editing to the zoonotic malaria parasite *P. knowlesi*.  
298 Whilst various approaches for CRISPR-Cas9 have been used for other malaria parasites (22, 29, 44,  
299 46), here we combine a plasmid containing a single recyclable positive selection marker with a fusion  
300 PCR-based approach for generation of repair templates. This allows for seamless insertion or deletion at  
301 any location within a gene and unlimited iterative modifications of the genome. Genome-wide reverse  
302 genetics screens have been applied with great success to the rodent malaria parasite, *P. berghei* (47, 48),  
303 but they have remained challenging for *P. falciparum*, and impossible for *P. vivax*. The tools presented  
304 here will enable scalable construct assembly and genome-wide systematic knockout or tagging screens  
305 in an alternative human infective species, thus providing a complementary tool to address both shared  
306 and species-specific biology. The analysis of lines with multiple tagged or deleted genes is particularly  
307 valuable for multigene families with highly redundant functions, as exemplified by our modification of  
308 all three *P. knowlesi* DBP genes.

309  
310 Here we investigate key parameters associated with successful genome editing and show that the  
311 process is also highly robust; targeting of the *p230p* locus demonstrated successful editing for 25/25  
312 transfections and only 1/10 sgRNAs targeting different loci failed to generate an edited line. The failure  
313 of an sgRNA guide (AGAAAATAGTGAAAACCCAT) designed to target the DBP $\beta$  locus, a non-  
314 essential gene, suggests that multiple guides may need to be tested for some loci. We did not detect any  
315 off-target effects, consistent with other reports of CRISPR-Cas9 use in malaria parasites (22, 29, 44,  
316 46). Negative selection of the pCas9/sg plasmid then enables generation of markerless lines allowing  
317 unlimited iterative modifications of the genome, with each round requiring only ~30 days (including  
318 dilution cloning). We systematically tested key parameters associated with successful genome editing  
319 and found increasing HR length enhanced integration efficiency proportionately, a trend seen in both *P.*  
320 *falciparum* and *P. berghei* (31, 44, 49). Whilst integration was detected with HRs as short as 50 bp,  
321 efficient editing was achieved with HRs between 200-800 bp. We were also able to examine how  
322 distance from the DSB affected editing efficiency. Whilst in other systems editing efficiency decreases

323 rapidly as the DSB distance increases, we saw only a steady decline with distance, an effect which  
324 could be ameliorated by simply increasing HR length.

325  
326 By applying these techniques to the *P. knowlesi* and *P. vivax* DBP family we have been able to examine  
327 the role of these genes in host and reticulocyte tropisms of the two species. Even after long-term  
328 adaptation to culture with human RBCs, *P. knowlesi* parasites can retain a strong preference for  
329 invasion of macaque RBCs reticulocytes (16, 33). Both DBP $\gamma$  and DBP $\beta$  have been shown to bind to  
330 proteins with a distinct sialic acid residue found in non-human primates, but absent in humans (16).  
331 Deletion of these genes had no effect on invasion of human RBCs, but interestingly also had no effect  
332 on invasion efficiency in macaque RBCs either, demonstrating that PkDBP $\alpha$  alone is sufficient to retain  
333 full invasive capacity and that the DBP proteins are not responsible for the macaque cell preference  
334 retained in the A1-H.1 human adapted line. Despite being closely related to *P. knowlesi* and other  
335 macaque infecting species such as *P. cynomolgi*, *P. vivax* cannot infect macaques and the PvDBP  
336 protein has been suggested to play a role in enforcing this tropism, as key interacting residues are  
337 missing within the macaque DARC protein (11). *P. knowlesi* parasites expressing PvDBP in the  
338 absence of DBP paralogues demonstrate a clear reduction in invasion capacity in macaque cells,  
339 resulting in an overall shift towards preference for human cells consistent with a PvDBP binding  
340 macaque DARC less efficiently. Nevertheless as invasion capacity remained quite close to that seen for  
341 human RBCs it seems unlikely that the PvDBP protein alone represents a significant barrier to *P. vivax*  
342 infection of macaques. Another key difference between the two species is that unlike *P. knowlesi*, *P.*  
343 *vivax* has a strict restriction to invasion of reticulocytes. A second family of RBC binding proteins,  
344 known as the reticulocyte binding-like proteins (RBPs) have previously been implicated in this tropism.  
345 More recently, the PvDBP protein itself has been implicated with work using recombinant PvDBP-RII  
346 suggesting that whilst DARC is present on both reticulocytes and mature normocytes, changes during  
347 red cell maturation mean that DARC is only accessible to PvDBP binding in young reticulocytes (10).  
348 Here we show that transgenic *P. knowlesi* parasites using PvDBP for invasion have no such restriction,  
349 invading human RBCs (which typically contain less than 0.5% reticulocytes) with the same efficiency  
350 as those expressing PkDBP – thus providing compelling evidence that PvDBP plays no role in the

351 reticulocyte tropism. Further, recent work determining that PvRBP2b, which lacks an orthologue in *P.*  
352 *knowlesi*, binds to the reticulocyte specific marker CD71 (50) further asserts the RBPs as the key to  
353 reticulocyte tropism. Importantly, the ability to compare and contrast activity of Pk/Pv DBP family  
354 members in parasitological assays will provide a vital new tool to test hypotheses and models arising  
355 from studies that have until now relied on assays using recombinant protein fragments.

356

357 Efforts to develop a *P. vivax* vaccine to elicit antibodies against the lead candidate PvDBP have  
358 predominantly relied on using ELISA-based assays, which assess the ability of antibodies to block  
359 recombinant PvDBP-RII binding to DARC (18), but are likely to be less informative than  
360 parasitological assays. Some epitopes identified in recombinant protein assays may be inaccessible in  
361 the context of invasion and it is also possible that not all inhibitory antibodies directly block receptor  
362 engagement. DARC-DBP binding is only one step in the multi-step invasion process, with subsequent  
363 conformational changes and potential downstream signalling roles for the protein (51). The full-length  
364 DBP antigen is 140 kDa which contains a C-terminal transmembrane domain and as such structural and  
365 biochemical analysis of the protein has almost exclusively focused on the PvDBP-RII fragment alone.  
366 The *P. knowlesi* PvDBP<sup>OR</sup> line thus provides an opportunity to interrogate the function of the full-length  
367 protein. Whilst efforts to standardise ex vivo *P. vivax* assays have been successful (15), they remain  
368 hugely challenging, low throughput and rely on genetically diverse *P. vivax* clinical isolates, that are  
369 maintained in culture for a only a single cycle of RBC invasion. A vaccine against *P. vivax* must  
370 ultimately elicit antibodies with strain-transcending inhibitory activity, but the ability to test on a  
371 defined genetic background can provide a significant advantage when it comes to benchmarking and  
372 prioritising target epitopes and characterising sera raised against them. Here we use the PvDBP  
373 sequence from the SallI reference strain, but multiple lines expressing distinct PvDBP variants could be  
374 generated in future, to systematically examine inhibition in heterologous strains. Isolates refractory to a  
375 given test antibody in ex vivo assays can then be sequenced and direct the generation of new transgenic  
376 *P. knowlesi* PvDBP<sup>OR</sup> variant lines to support rational vaccine development. These assays in turn can  
377 provide vital triaging for non-human primate models, and controlled human challenge infections (13,  
378 15, 17, 19) – both of which carry the imperative to ensure that only highly optimised antigens are tested.



379 The transgenic *P. knowlesi* OR lines developed here represent the ideal platform for scalable testing of  
380 polyclonal and monoclonal sera from vaccine trials and natural *P. vivax* infections. This will enable  
381 detailed investigation of epitopes providing invasion inhibitory activity and a means for systematic  
382 development of a strain-transcending vaccine. Our work also revealed low-level cross-reactivity of  
383 PvDBP-RII antibodies against *P. knowlesi* and suggests cross-immunity between the two species could  
384 exist in the field, which may have a significant impact on disease outcome. Understanding the precise  
385 epitopes involved could facilitate development of a dual species vaccine, and epitopes conserved across  
386 species are also more likely to be conserved across polymorphic strains of *P. vivax*. The same approach  
387 could readily be applied to other potential vaccine candidates, novel drug targets or to investigate  
388 mechanisms of drug resistance, which are also thought to differ between *P. falciparum* and *P. vivax*  
389 (52).

390 In conclusion, we demonstrate that adaptation of CRISPR-Cas9 genome editing to *P. knowlesi* provides  
391 a powerful system for scalable genome editing of malaria parasites and can provide critical new tools  
392 for studying both shared and species-specific biology.

393

## 394 **Methods**

### 395 **Macaque and Human RBCs.**

396 *Macaca fascicularis* blood was collected by venous puncture. Animal work was reviewed and approved  
397 by the local National Institute for Biological Standards and Control Animal Welfare and Ethical Review  
398 Body (the Institutional Review Board) and by the United Kingdom Home Office as governed by United  
399 Kingdom law under the Animals (Scientific Procedures) Act 1986. Animals were handled in strict  
400 accordance with the “Code of Practice Part 1 for the housing and care of animals (21/03/05)” available  
401 at <https://www.gov.uk/research-and-testing-using-animals>. The work also met the National Centre for  
402 the Replacement Refinement and Reduction of Animals in Research (NC3Rs) guidelines on primate  
403 accommodation, care, and use ([https://www.nc3rs.org.uk/non-human-primate-accommodation-care-](https://www.nc3rs.org.uk/non-human-primate-accommodation-care-and-use)  
404 [and-use](https://www.nc3rs.org.uk/non-human-primate-accommodation-care-and-use)), which exceed the legal minimum standards required by the United Kingdom Animals  
405 (Scientific Procedures) Act 1986, associated Codes of Practice, and the US Institute for Laboratory



406 Animal Research Guide. Human blood (Duffy (FY) positive) was obtained from the United Kingdom  
407 National Blood Transfusion Service under a research agreement.

408

#### 409 **Parasite Maintenance, transfection and dilution cloning**

410 Parasites were maintained in complete media, comprising RPMI 1640 (Invitrogen) with the following  
411 additions: 2.3 g/L sodium bicarbonate, 4 g/L dextrose, 5.957 g/L HEPES, 0.05 g/L hypoxanthine, 5 g /L  
412 Albumax II, 0.025 g/L gentamycin sulfate, 0.292 g/L L-glutamine, and 10 % (vol/vol) horse serum as  
413 described previously (33). Parasites were synchronized by using gradient centrifugation with 55 %  
414 nycodenz (Progen) in RPMI to enrich schizonts, followed by a two-hour incubation with 4-[7-  
415 [(dimethylamino)methyl]-2-(4-fluorophenyl)imidazo[1,2-*a*]pyridin-3-yl]pyrimidin-2-amine (compound  
416 2) which inhibits parasite egress(31). Incubations in compound 2 longer than 2 hours led to  
417 degeneration of schizonts and reduction in invasive capacity.

418 Tightly synchronized mature schizonts were transfected as described previously using the Amaxa 4D  
419 electroporator (Lonza) and the P3 Primary cell 4D Nucleofector X Kit L (Lonza)(20). 10 µl DNA  
420 including at 20 µg repair template pDonor\_ *p230p* and 20 µg pCas9/sg\_ *p230p* plasmid was used for  
421 transfections to generate eGFP expressing lines. 10 µl DNA including 15 µg repair template and 7 µg  
422 pCas9/sg\_ *p230p* plasmid was used for transfections to integrate the eGFP expression cassette into the  
423 *p230p* locus with PCR repair templates. For generating tagged lines 10 µg pCas/sg\_ GOI plasmid and 20  
424 µg PCR repair templates were used. After 24 h, and at daily intervals for 5 days, the medium was  
425 replaced with fresh medium containing 100 nM pyrimethamine (Sigma). Parasites were cloned out by  
426 limiting dilution. Parasites were diluted to 0.3 parasites/100 µl and 100 µl of 2 % haematocrit culture  
427 was transferred to 96 flat-bottom plates in culture medium containing 200 mM L-glutamax (Sigma).  
428 After 7 days the media was changed and 0.2 % fresh blood added. On day 11 the plate was screened for  
429 plaques, in an assay modified from *P. falciparum* (32). Plaque positive cultures were transferred to 24  
430 well plates containing 1 ml media with 2 % haematocrit and used for genotyping.

431

#### 432 **DNA Constructs and PCRs**

433 Preparative DNA for plasmid cloning and PCR fusion constructs was amplified with CloneAmp  
434 (Takara) using the following cycle conditions: 32 cycles of 5 s at 98°C , 20 s at 55°C, and 5 s/kb at  
435 72°C . Genomic DNA was prepared using DNeasy blood and tissue kit (Qiagen).

436  
437 **Cloning of pkcon\_mCherry plasmid:** The plasmid PkconGFP (20) was modified to replace the GFP  
438 coding sequence with mCherry using XmaI and SacII restriction sites. The mCherry sequence was  
439 amplified with primers fwd-ATATCCCCGGGATGGTGAGCAAGGGCGAGGAG and rev-  
440 ATATCCGCGGTACTTGTACAGCTCGTCCATGCC.

441  
442 **Cloning of pCas/sg:** The pUF1 plasmid (22) was modified by replacing the yDHODH expression  
443 cassette with hDHFR-yFCU fusion with Pkef1a 5'UTR and Pbdhfr 3'UTR using EcoRI and SacII. The  
444 Pfu6 promoter for gRNA expression of the pL6 plasmid (22) was replaced with the Pku6 5'  
445 regulatable region of 1244 bp (amplified with primers fwd-  
446 ATATCCATGGGGCCAGGGAAGAACGGTTAGAG and rev-  
447 atattcgcgagcgatgagttcctaggAATAATATACTGTAAC) using NruI and NcoI and the entire cassette inserted  
448 into the pCas9 plasmid with PvuI and ApaI restriction sites. Each target specific 20 bp guide sequence  
449 was chosen with the Protospacer software (<http://www.protospacer.com/>) (49), with off-target score <  
450 0.03. On-target scores were retrieved from Benchling Software (53). All guide sequences are listed in  
451 Table S3. Subsequently each guide was inserted into the BtgZI linearized pCas/sg plasmid by In-Fusion  
452 cloning (Takara) using primers fwd-TTACAGTATATTATT(N20)GTTTTAGAGCTAGAA and rev-  
453 TTCTAGCTCTAAAAC(N20)AATAATATACTGTAA. Briefly, 50 bp primers pairs containing the 20  
454 bp guide sequence flanked by 15 bp overhangs homologous to the 5' and 3' ends of pCas/sg were  
455 denatured by incubation at 95 °C for 10 min and annealed by slow cooling. 0.5 µM annealed primers  
456 and 50 ng BtgZI linearized pCas/sg vector were incubated with In-fusion Premix (Takarta) at 50°C for  
457 15 min. The resulting plasmid was transformed into XL10 gold competent *E.coli* cells (Agilent).  
458 Plasmids for transfection were prepared by Midi-preps (QIAGEN) and ethanol precipitated. The DNA  
459 pellet was washed twice with 70 % ethanol and resuspended in sterile TE buffer.

460 **Cloning of pDonor<sub>p230p</sub>**: a plasmid containing a multiple cloning site with SacII, SpeI, NotI, BlnI  
461 and NcoI was designed (subsequently called pDonor) and obtained from Geneart (Thermo Fisher  
462 Scientific). Homology region 1 (HR1) was amplified from A1-H.1 wild type genomic DNA with  
463 primers olFM007 and olFM008 and added with SacII and SpeI restriction sites. HR2 was amplified  
464 with primers olFM005 and olFM006 and was added with BlnI and NcoI sites. The eGFP cassette was  
465 amplified from the pPkconGFP<sub>p230p</sub> plasmid with primers olFM151 and olFM152 and inserted into the  
466 plasmid with SpeI and BlnI sites. The final vector was linearised with PvuI restriction enzyme and  
467 ethanol precipitated as described above.

468  
469 **Cloning of pDonor<sub>pkdbpa</sub>**: Plasmid *pDonor* was modified by restriction cloning to include two 500  
470 bp HRs from PkDBPa 5' and 3'UTRs using primers olFM062 and olFM063 (adding SacII /SpeI sites)  
471 and primers olFM064 and olFM065 (adding NotI/NcoI sites) respectively. Recodonised sequences of  
472 PkDBPa and PvDBP of the *P. vivax* Salvador I strain flanked with SpeI and NcoI restriction sites were  
473 obtained from Geneart (Thermo Fisher Scientific) and subsequently cloned between both HRs of the  
474 modified pDonor plasmid using SpeI and NcoI sites. The resulting plasmid was linearised with PvuI  
475 restriction enzyme and ethanol precipitated as described above.

476  
477 **Cloning of pDonor<sub>pkdbpy</sub>**: Plasmid *pDonor* was modified by restriction cloning to include two HRs  
478 from PkDBPy 5' and 3'UTRs using primers olFM245 and olFM0246 (adding SacII /SpeI sites) and  
479 primers olFM0247 and olFM248 (adding NotI/NcoI sites) respectively. A spacer sequence, to aid in  
480 subsequent diagnostic PCRs was generated by polymerase cycling assembly (PCA). Briefly, the spacer  
481 sequence was synthesised by using primers of 60 bp length with 20 bp homologous sequence to the  
482 adjacent primers on each side. Final concentrations of 0.6  $\mu$ M for outer primers (ol488 and ol492) and  
483 0.03  $\mu$ M of inner primers (ol489, ol490, ol491 and ol503) were used for PCA with the same cycle  
484 conditions as described for PCR. The final product was inserted with SpeI and NcoI restriction sites  
485 between the HRs as described for pDonor<sub>pkdbpa</sub> cloning, to replace the deleted DBPy genes. Primer  
486 sequences are listed in Table S4 and S6.

487

488

### 489 **Three-step nested PCR**

490 Generation of each PCR repair template was carried out by a three-step nested PCR method to fuse  
491 together HRs with the insert DNA (eGFP expression cassette, eGFP with N-terminal linker or mCherry  
492 with C-terminal linker). In a first set of PCRs, the DNA insert (eGFP expression cassette or tag) and the  
493 HRs for integration into the region of interest were individually amplified in duplicate. The HRs  
494 contained at least 20 bp and 58°C T<sub>m</sub> overhangs with homology to the insert DNA (HR1 with C-term  
495 overhang homologous to the N-term of insert DNA and HR2 with N-term overhang homologous to the  
496 C-term of the insert DNA). All duplicates were pooled and products were extracted from agarose gel  
497 (Qiagen) to remove primers and background amplicons. In a second nested PCR HR1 was fused to the  
498 donor amplicon in duplicate with double the amount of time allowed for the elongation step (10 s/kb)  
499 and again the product was gel extracted. In the final step the HR1-insert and HR2 were fused together  
500 resulting in the final product HR1-insert-HR2 (Fig 2A). PCR repair templates for HA tagging were  
501 generated in a two-step PCR method. First the HRs were individually amplified with addition of 27 bp  
502 HA sequence overhangs on the 3' end of HR1 and the 5' end of HR2. In the second nested PCR HR1 and  
503 HR2 were fused.

504 All primers are listed in Table S4 and all primer combinations for each construct are listed in Table S5.

505 Six to eight 50 µl reactions of the final construct PCRs were pooled (300 to 400 µl final volume and 20  
506 µg DNA), ethanol precipitated and resuspended into sterile TE buffer for transfection. DNA

507 concentrations were determined using Nano-Drop and band intensity measurement with BioRad Image  
508 lab software.

509

### 510 **DNA analysis**

511 Genomic DNA from transfected parasite lines was extracted (QIAGEN) and analysed by PCR with  
512 GoTaq Master Mix (Promega) using the following conditions: 3 min at 96 °C, then 30 cycles of 25 s at  
513 96 °C, 25 s at 52 °C, and 1 min/kb at 64 °C.

514

515

516

## 517 **Western blotting**

518 To detect tagged proteins of interest, soluble cell extracts were prepared by lysing Nycodenz-enriched  
519 schizonts in 0.15 % saponin. Parasite pellets were washed several times with cold PBS and  
520 centrifugation at 13,000 rpm for 3 minutes at 4 °C to remove haemoglobin and red cell debris. Pellets  
521 were lysed in 5 pellet volumes of RIPA buffer (25 mM Tris, 150 mM NaCl, 1 % Triton X-100, 0.5 %  
522 Sodium deoxycholate, 0.1 % SDS, pH 7.5, 1x Roche Protease Inhibitors) supplemented with 50 units  
523 BaseMuncher (Expedeon) on ice for 20 minutes. This whole cell lysate was clarified by centrifugation  
524 at 13,000 rpm for 30 minutes at 4 °C. Soluble extracts were separated on Mini-Protean 4-20 % TGX  
525 gels (Bio-Rad) and transferred to nitrocellulose using the Trans-blot Turbo system (Bio-  
526 Rad). Equivalent uninfected red cell lysate or wild type *P. knowlesi* schizont lysates were analysed  
527 alongside lysates containing tagged proteins of interest. Membranes were blocked overnight, and tagged  
528 proteins were detected with mouse anti-GFP (Sigma, 1:5,000), rat anti-HA (Sigma 3F10 clone,  
529 1:5,000), or rabbit anti-mCherry (ChromoTek, 1:5,000). Primary antibodies were detected using HRP-  
530 conjugated secondary antibodies (Bio-Rad, 1:5,000) and ECL (ThermoFisher Pierce).  
531 Chemiluminescence was captured using the Azure c600 system.

532

## 533 **Immunofluorescence assays and live cell imaging**

534 Immunofluorescence assays were performed using blood smears fixed with 4 % paraformaldehyde for  
535 30 min followed by washing in PBS and permeabilisation in 0.1 % Triton-X100 for 10 min. Slides of  
536 HA-tagged parasite lines were blocked overnight at 4°C in 3 % bovine serum albumin/PBS and then  
537 labelled with rabbit anti-HA high affinity (1:250) and Alexa Fluor 488-conjugated  $\alpha$ -rabbit IgG  
538 (1:5000) (Thermo Fisher Scientific). The smears were mounted in ProLong Antifade mountant with  
539 DAPI (Thermo Fisher Scientific). For live cell imaging parasites were stained with Hoechst 33342  
540 (New England Biolabs), transferred to poly-L-lysine-coated  $\mu$ -slides VI (Ibidi, Martinsried, Germany).  
541 Both live and fixed preparations were viewed with a Nikon Ti E inverted microscope using a 100x oil  
542 immersion objective and imaged with an ORCA Flash 4.0 CMOS camera (Hamamatsu). Images were  
543 acquired and processed using the Nikon Elements Advanced Research software package.

544

#### 545 **Invasion assays**

546 Purified schizonts were set up in technical duplicate cultures with human RBCs, at a 2 % hematocrit  
547 and ~1 % parasitemia in 24 well plates. Parasitemia was measured with a flow cytometry (FACS)-based  
548 assay before and after incubation at 37 °C in a gassed chamber for 24 h. Samples were fixed with 2 %  
549 paraformaldehyde (Sigma) and 0.2 % glutaraldehyde (Sigma) in PBS for 1 h at 4°C, washed,  
550 permeabilized with Triton X-100, and then washed again before 1 h RNase (MP Biomedicals)  
551 treatment, staining with SYBR Green I (Life Technologies), and FACS analysis. The samples were  
552 analyzed on a Becton Dickenson LSR-II. Data were acquired using FACSDiva 6.1.3 software and  
553 analyzed using FlowJo\_V10. Three independent experiments were carried out in *Macaca fascicularis*  
554 blood and eight independent experiments were carried out in human blood. Statistical analyses was  
555 carried out with unpaired t-test comparing mean of PvDBP<sup>OR</sup>/Δβ and PvDBP<sup>OR</sup>/ΔβΔγ lines against the  
556 respective PkDBP<sup>OR</sup> control parasite lines.

557

#### 558 **Growth inhibition activity assays**

559 Assays of growth inhibition activity (GIA), in the presence of anti-PvDBP\_RII antibodies, were carried  
560 out using total IgG purified from rabbit sera using protein G columns (Pierce). Immunisation of rabbits  
561 against PvDBP\_RII (Sall) has been described previously (55). Purified IgG was buffer-exchanged into  
562 RPMI 1640 medium, concentrated using ultra centrifugal devices (Millipore) and filter sterilized  
563 through a 0.22 μm filter (Millipore) prior to being aliquoted and frozen at -20 °C until use.

564 *P. knowlesi* parasites were synchronized by magnetic separation (MACS LS columns, Miltenyi  
565 Biotech). Synchronized trophozoites were adjusted to 1.5 % parasitemia, and 20 μL aliquots were  
566 pipetted into 96-well flat/half area tissue culture cluster plates (Appleton Woods). 20 μL purified IgG  
567 were added to triplicate test wells at eight final concentrations (10, 5, 2.5, 1.25, 0.625, 0.312, 0.15 and  
568 0.075 mg/mL) and incubated for one cycle (26-30 h). Parasitemia was measured using the lactate  
569 dehydrogenase (pLDH) activity assay following standard protocols (56). An anti-DARC Fy6 VHH  
570 nanobody (45), a kind gift from Dr Olivier Bertrand (INSERM, France), was included in the test plate

571 as a positive control in every assay (final concentration 1.5 or 3 µg/mL) and purified control IgG from  
572 the pre-immunisation sera of matched rabbits were used as the negative control. Anti-PkMSP119 rabbit  
573 sera, a kind gift from Ellen Knuepfer (Crick Institute, UK), was also tested in a similar manner. GIA of  
574 the purified IgG was expressed as percent inhibition calculated as follows:  $100 - [(OD_{650} \text{ of infected}$   
575  $\text{erythrocytes with test IgG} - OD_{650} \text{ of normal erythrocytes only}) / (OD_{650} \text{ of infected erythrocytes}$   
576  $\text{without any IgG} - OD_{650} \text{ of normal erythrocytes only}) \times 100 \%$ ].

### 577 **Whole genome sequencing**

578 Genomic DNA was prepared for the PvDBP<sup>OR</sup>/ΔβΔy using the Blood and Tissue Kit (Qiagen). DNA  
579 libraries were prepared using the QIAseq FX DNA Library Kit (Qiagen) as per manufacturer's  
580 instructions. A 20-minute fragmentation step was optimized for *Plasmodium* samples. Whole genome  
581 sequencing was performed using Illumina MiSeq technology with 150-base paired end fragment sizes.  
582 Raw sequence data for the A1-H.1 parental line was extracted from the European Nucleotide Archive as  
583 per (33, 57). The raw sequence data (accession number ERS3042513) was processed as previously  
584 described (58). In brief, the raw sequence data was aligned onto the A1-H.1 reference genome using the  
585 *bwa-mem* short read alignment algorithm (59), and coverage statistics were obtained using the  
586 *sambamba* software (60) to be plotted using R.

587

### 588 **References**

- 589 1. WHO. World Health Organization. World Malaria Report. World Health Organization, 2018:  
590 2018.
- 591 2. Singh B, Daneshvar C. Human infections and detection of *Plasmodium knowlesi*. Clin Microbiol  
592 Rev. 2013;26(2):165-84.
- 593 3. Adams JH, Mueller I. The Biology of *Plasmodium vivax*. Cold Spring Harbor Perspectives in  
594 Medicine. 2017;7(9).
- 595 4. Pacheco MA, Matta NE, Valkiunas G, Parker PG, Mello B, Stanley CE, et al. Mode and Rate of  
596 Evolution of Haemosporidian Mitochondrial Genomes: Timing the Radiation of Avian Parasites.  
597 Molecular Biology and Evolution. 2018;35(2):383-403.
- 598 5. Adams JH, Hudson DE, Torii M, Ward GE, Wellem TE, Aikawa M, et al. The Duffy receptor family  
599 of *Plasmodium knowlesi* is located within the micronemes of invasive malaria merozoites. Cell.  
600 1990;63(1):141-53.
- 601 6. Horuk R, Chitnis CE, Darbonne WC, Colby TJ, Rybicki A, Hadley TJ, et al. A receptor for the  
602 malarial parasite *Plasmodium vivax*: the erythrocyte chemokine receptor. Science.  
603 1993;261(5125):1182-4.



- 604 7. Singh AP, Ozwara H, Kocken CH, Puri SK, Thomas AW, Chitnis CE. Targeted deletion of  
605 *Plasmodium knowlesi* Duffy binding protein confirms its role in junction formation during invasion. Mol  
606 Microbiol. 2005;55(6):1925-34.
- 607 8. Miller LH, Mason SJ, Dvorak JA, McGinniss MH, Rothman IK. Erythrocyte receptors for  
608 (*Plasmodium knowlesi*) malaria: Duffy blood group determinants. Science. 1975;189(4202):561-3.
- 609 9. Ranjan A, Chitnis CE. Mapping regions containing binding residues within functional domains of  
610 *Plasmodium vivax* and *Plasmodium knowlesi* erythrocyte-binding proteins. Proceedings of the National  
611 Academy of Sciences of the United States of America. 1999;96(24):14067-72.
- 612 10. Ovchinnikova E, Agliarolo F, Bentlage AEH, Vidarsson G, Salinas ND, von Lindern M, et al. DARC  
613 extracellular domain remodeling in maturing reticulocytes explains *Plasmodium vivax* tropism. Blood.  
614 2017;130(12):1441-4.
- 615 11. Tachibana SI, Kawai S, Katakai Y, Takahashi H, Nakade T, Yasutomi Y, et al. Contrasting infection  
616 susceptibility of the Japanese macaques and cynomolgus macaques to closely related malaria parasites,  
617 *Plasmodium vivax* and *Plasmodium cynomolgi*. Parasitology International. 2015;64(3):274-81.
- 618 12. Ntumngia FB, Schloegel J, Barnes SJ, McHenry AM, Singh S, King CL, et al. Conserved and Variant  
619 Epitopes of *Plasmodium vivax* Duffy Binding Protein as Targets of Inhibitory Monoclonal Antibodies.  
620 Infection and Immunity. 2012;80(3):1203-8.
- 621 13. Payne RO, Silk SE, Elias SC, Milne KH, Rawlinson TA, Llewellyn D, et al. Human vaccination against  
622 *Plasmodium vivax* Duffy-binding protein induces strain-transcending antibodies. JCI Insight. 2017;2(12).
- 623 14. Singh K, Mukherjee P, Shakri AR, Singh A, Pandey G, Bakshi M, et al. Malaria vaccine candidate  
624 based on Duffy-binding protein elicits strain transcending functional antibodies in a Phase I trial. Npj  
625 Vaccines. 2018;3.
- 626 15. Russell B, Suwanarusk R, Borlon C, Costa FT, Chu CS, Rijken MJ, et al. A reliable ex vivo invasion  
627 assay of human reticulocytes by *Plasmodium vivax*. Blood. 2011;118(13):e74-81.
- 628 16. Dankwa S, Lim C, Bei AK, Jiang RHY, Abshire JR, Patel SD, et al. Ancient human sialic acid variant  
629 restricts an emerging zoonotic malaria parasite. Nature Communications. 2016;7.
- 630 17. Arevalo-Herrera M, Castellanos A, Yazdani SS, Shakri AR, Chitnis CE, Dominik R, et al.  
631 Immunogenicity and protective efficacy of recombinant vaccine based on the receptor-binding domain  
632 of the *Plasmodium vivax* Duffy binding protein in *Aotus* monkeys. Am J Trop Med Hyg. 2005;73(5  
633 Suppl):25-31.
- 634 18. Shakri AR, Rizvi MMA, Chitnis CE. Development of Quantitative Receptor-Ligand Binding Assay  
635 for use as a tool to estimate Immune Responses against *Plasmodium vivax* Duffy Binding Protein Region  
636 II. Journal of Immunoassay & Immunochemistry. 2012;33(4):403-13.
- 637 19. Payne RO, Griffin PM, McCarthy JS, Draper SJ. *Plasmodium vivax* Controlled Human Malaria  
638 Infection - Progress and Prospects. Trends Parasitol. 2017;33(2):141-50.
- 639 20. Moon RW, Hall J, Rangkuti F, Ho YS, Almond N, Mitchell GH, et al. Adaptation of the genetically  
640 tractable malaria pathogen *Plasmodium knowlesi* to continuous culture in human erythrocytes. Proc  
641 Natl Acad Sci U S A. 2013;110(2):531-6.
- 642 21. Lim C, Hansen E, DeSimone TM, Moreno Y, Junker K, Bei A, et al. Expansion of host cellular niche  
643 can drive adaptation of a zoonotic malaria parasite to humans. Nature Communications. 2013;4.
- 644 22. Ghorbal M, Gorman M, Macpherson CR, Martins RM, Scherf A, Lopez-Rubio JJ. Genome editing  
645 in the human malaria parasite *Plasmodium falciparum* using the CRISPR-Cas9 system. Nat Biotechnol.  
646 2014;32(8):819-21.
- 647 23. Gardner MJ, Hall N, Fung E, White O, Berriman M, Hyman RW, et al. Genome sequence of the  
648 human malaria parasite *Plasmodium falciparum*. Nature. 2002;419(6906):498-511.
- 649 24. Gruring C, Moon RW, Lim C, Holder AA, Blackman MJ, Duraisingh MT. Human red blood cell-  
650 adapted *Plasmodium knowlesi* parasites: a new model system for malaria research. Cell Microbiol.  
651 2014;16(5):612-20.
- 652 25. Kocken CHM, Ozwara H, van der Wel A, Beetsma AL, Mwenda JM, Thomas AW. *Plasmodium*  
653 *knowlesi* provides a rapid in vitro and in vivo transfection system that enables double-crossover gene  
654 knockout studies. Infection and Immunity. 2002;70(2):655-60.



- 655 26. Kirkman LA, Lawrence EA, Deitsch KW. Malaria parasites utilize both homologous  
656 recombination and alternative end joining pathways to maintain genome integrity. *Nucleic Acids*  
657 *Research*. 2014;42(1):370-9.
- 658 27. Crawford ED, Quan J, Horst JA, Ebert D, Wu W, DeRisi JL. Plasmid-free CRISPR/Cas9 genome  
659 editing in *Plasmodium falciparum* confirms mutations conferring resistance to the dihydroisoquinolone  
660 clinical candidate SJ733. *PLoS One*. 2017;12(5):e0178163.
- 661 28. Knuepfer E, Napiorkowska M, van Ooij C, Holder AA. Generating conditional gene knockouts in  
662 *Plasmodium* - a toolkit to produce stable DiCre recombinase-expressing parasite lines using  
663 CRISPR/Cas9. *Scientific Reports*. 2017;7.
- 664 29. Lu J, Tong Y, Pan J, Yang Y, Liu Q, Tan X, et al. A redesigned CRISPR/Cas9 system for marker-free  
665 genome editing in *Plasmodium falciparum*. *Parasit Vectors*. 2016;9:198.
- 666 30. Mogollon CM, van Pul FJA, Imai T, Ramesar J, Chevalley-Maurel S, de Roo GM, et al. Rapid  
667 Generation of Marker-Free *Plasmodium falciparum* Fluorescent Reporter Lines Using Modified  
668 CRISPR/Cas9 Constructs and Selection Protocol. *Plos One*. 2016;11(12).
- 669 31. Collins CR, Hackett F, Strath M, Penzo M, Withers-Martinez C, Baker DA, et al. Malaria parasite  
670 cGMP-dependent protein kinase regulates blood stage merozoite secretory organelle discharge and  
671 egress. *PLoS Pathog*. 2013;9(5):e1003344.
- 672 32. Thomas JA, Collins CR, Das S, Hackett F, Graindorge A, Bell D, et al. Development and Application  
673 of a Simple Plaque Assay for the Human Malaria Parasite *Plasmodium falciparum*. *PLoS One*.  
674 2016;11(6):e0157873.
- 675 33. Moon RW, Sharaf H, Hastings CH, Ho YS, Nair MB, Rchiad Z, et al. Normocyte-binding protein  
676 required for human erythrocyte invasion by the zoonotic malaria parasite *Plasmodium knowlesi*. *Proc*  
677 *Natl Acad Sci U S A*. 2016;113(26):7231-6.
- 678 34. Ecker A, Moon R, Sinden RE, Billker O. Generation of gene targeting constructs for *Plasmodium*  
679 *berghei* by a PCR-based method amenable to high throughput applications. *Molecular and Biochemical*  
680 *Parasitology*. 2006;145(2):265-8.
- 681 35. Byrne SM, Ortiz L, Mali P, Aach J, Church GM. Multi-kilobase homozygous targeted gene  
682 replacement in human induced pluripotent stem cells. *Nucleic Acids Res*. 2015;43(3):e21.
- 683 36. Ribeiro JM, Garriga M, Potchen N, Crater AK, Gupta A, Ito D, et al. Guide RNA selection for  
684 CRISPR-Cas9 transfections in *Plasmodium falciparum*. *Int J Parasitol*. 2018.
- 685 37. Pain A, Bohme U, Berry AE, Mungall K, Finn RD, Jackson AP, et al. The genome of the simian and  
686 human malaria parasite *Plasmodium knowlesi*. *Nature*. 2008;455(7214):799-803.
- 687 38. Bannister LH, Hopkins JM, Dluzewski AR, Margos G, Williams IT, Blackman MJ, et al. *Plasmodium*  
688 *falciparum* apical membrane antigen 1 (PfAMA-1) is translocated within micronemes along subpellicular  
689 microtubules during merozoite development. *Journal of Cell Science*. 2003;116(18):3825-34.
- 690 39. Cao J, Kaneko O, Thongkukiatkul A, Tachibana M, Otsuki H, Gao Q, et al. Rhoptry neck protein  
691 RON2 forms a complex with microneme protein AMA1 in *Plasmodium falciparum* merozoites.  
692 *Parasitology International*. 2009;58(1):29-35.
- 693 40. Baum J, Richard D, Healer J, Rug M, Krnajski Z, Gilberger TW, et al. A conserved molecular motor  
694 drives cell invasion and gliding motility across malaria life cycle stages and other apicomplexan parasites.  
695 *J Biol Chem*. 2006;281(8):5197-208.
- 696 41. Ehlgen F, Pham JS, de Koning-Ward T, Cowman AF, Ralph SA. Investigation of the *Plasmodium*  
697 *falciparum* food vacuole through inducible expression of the chloroquine resistance transporter (PfCRT).  
698 *Plos One*. 2012;7(6).
- 699 42. Birnbaum J, Flemming S, Reichard N, Soares AB, Mesen-Ramirez P, Jonscher E, et al. A genetic  
700 system to study *Plasmodium falciparum* protein function. *Nat Methods*. 2017;14(4):450-6.
- 701 43. Zischewski J, Fischer R, Bortesi L. Detection of on-target and off-target mutations generated by  
702 CRISPR/Cas9 and other sequence-specific nucleases. *Biotechnol Adv*. 2017;35(1):95-104.
- 703 44. Wagner JC, Platt RJ, Goldfless SJ, Zhang F, Niles JC. Efficient CRISPR-Cas9-mediated genome  
704 editing in *Plasmodium falciparum*. *Nature Methods*. 2014;11(9):915-8.

- 705 45. Smolarek D, Hattab C, Hassanzadeh-Ghassabeh G, Cochet S, Gutierrez C, de Brevern AG, et al.  
706 A recombinant dromedary antibody fragment (VHH or nanobody) directed against human Duffy antigen  
707 receptor for chemokines. *Cell Mol Life Sci*. 2010;67(19):3371-87.
- 708 46. Zhang C, Gao H, Yang Z, Jiang Y, Li Z, Wang X, et al. CRISPR/Cas9 mediated sequential editing of  
709 genes critical for ookinete motility in *Plasmodium yoelii*. *Mol Biochem Parasitol*. 2017;212:1-8.
- 710 47. Bushell E, Gomes AR, Sanderson T, Anar B, Girling G, Herd C, et al. Functional Profiling of a  
711 *Plasmodium* Genome Reveals an Abundance of Essential Genes. *Cell*. 2017;170(2):260-72 e8.
- 712 48. Gomes AR, Bushell E, Schwach F, Girling G, Anar B, Quail MA, et al. A Genome-Scale Vector  
713 Resource Enables High-Throughput Reverse Genetic Screening in a Malaria Parasite. *Cell Host &*  
714 *Microbe*. 2015;17(3):404-13.
- 715 49. MacPherson CR, Scherf A. Flexible guide-RNA design for CRISPR applications using Protospacer  
716 Workbench. *Nature Biotechnology*. 2015;33(8):805-6.
- 717 50. Gruszczyk J, Kanjee U, Chan LJ, Menant S, Malleret B, Lim NTY, et al. Transferrin receptor 1 is a  
718 reticulocyte-specific receptor for *Plasmodium vivax*. *Science*. 2018;359(6371):48-+.
- 719 51. Batchelor JD, Zahm JA, Tolia NH. Dimerization of *Plasmodium vivax* DBP is induced upon  
720 receptor binding and drives recognition of DARC. *Nature Structural & Molecular Biology*.  
721 2011;18(8):908-U67.
- 722 52. Price RN, von Seidlein L, Valecha N, Nosten F, Baird JK, White NJ. Global extent of chloroquine-  
723 resistant *Plasmodium vivax*: a systematic review and meta-analysis. *Lancet Infect Dis*. 2014;14(10):982-  
724 91.
- 725 53. Benchling. Benchling [Biology Software]. Retrieved from <http://benchling.com>. 2018.
- 726 54. Bei AK, DeSimone TM, Badiane AS, Ahouidi AD, Dieye T, Ndiaye D, et al. A flow cytometry-based  
727 assay for measuring invasion of red blood cells by *Plasmodium falciparum*. *American Journal of*  
728 *Hematology*. 2010;85(4):234-7.
- 729 55. de Cassan SC, Shakri AR, Llewellyn D, Elias SC, Cho JS, Goodman AL, et al. Preclinical Assessment  
730 of Viral Vectored and Protein Vaccines Targeting the Duffy-Binding Protein Region II of *Plasmodium*  
731 *Vivax*. *Front Immunol*. 2015;6:348.
- 732 56. Kennedy MC, Wang J, Zhang Y, Miles AP, Chitsaz F, Saul A, et al. In vitro studies with recombinant  
733 *Plasmodium falciparum* apical membrane antigen 1 (AMA1): production and activity of an AMA1 vaccine  
734 and generation of a multiallelic response. *Infect Immun*. 2002;70(12):6948-60.
- 735 57. Benavente ED, de Sessions PF, Moon RW, Grainger M, Holder AA, Blackman MJ, et al. A  
736 reference genome and methylome for the *Plasmodium knowlesi* A1-H.1 line. *International Journal for*  
737 *Parasitology*. 2018;48(3-4):191-6.
- 738 58. Campino S, Benavente ED, Assefa S, Thompson E, Drought LG, Taylor CJ, et al. Genomic variation  
739 in two gametocyte non-producing *Plasmodium falciparum* clonal lines. *Malaria Journal*. 2016;15.
- 740 59. Li H, Durbin R. Fast and accurate short read alignment with Burrows-Wheeler transform.  
741 *Bioinformatics*. 2009;25(14):1754-60.
- 742 60. Tarasov A, Vilella AJ, Cuppen E, Nijman IJ, Prins P. Sambamba: fast processing of NGS alignment  
743 formats. *Bioinformatics*. 2015;31(12):2032-4.

744

745

746 **Acknowledgements** This work is supported by an MRC Career Development Award (MR/M021157/1)  
747 jointly funded by the UK Medical Research Council and Department for International Development  
748 (R.W.M, F.M). M.N.H. is supported by a Bloomsbury Colleges research studentship. J.A.C. is  
749 supported by a BBSRC LIDO studentship. T.A.R. held a Wellcome Trust Research Training Fellowship  
750 [108734/Z/15/Z]; T.G.C. is funded by the Medical Research Council UK [ref. MR/M01360X/1,

751 MR/N010469/1, MR/R025576/1, and MR/R020973/1] and BBSRC [ref. BB/R013063/1]. S.C. is  
752 funded by Medical Research Council UK grants [ref. MR/M01360X/1, MR/R025576/1, and  
753 MR/R020973/1]. S.J.D. is a Jenner Investigator, a Lister Institute Research Prize Fellow and a  
754 Wellcome Trust Senior Fellow [106917/Z/15/Z]. We are grateful to the Wellcome Trust for a Senior  
755 Investigator Award to D.A.B. (ref. 106240/Z/14/Z). R.C.H. is supported by a Marshall Scholarship  
756 granted by Her Majesty's Government. C.J.S. is supported by Public Health England.  
757 We thank Jose-Juan Lopez-Rubio for providing the pUF and pl6 plasmid, and also David Llewellyn,  
758 Jennifer Marshall and Doris Quinkert (University of Oxford) for assistance with rabbit immunisations,  
759 parasite culturing and the assays of GIA. We would also like to thank Michael Blackman (Francis Crick  
760 Institute) for providing Compound 2.

761  
762 **Author Contributions** F.M. and M.N.H. designed and generated PCR constructs, performed parasite  
763 transfections, growth assays and microscopy. F.M., M.N.H. and A.P designed and generated plasmid  
764 constructs. T.A.R. carried out GIA assays and R.H. carried out Western blots. J.A.C and E.D.B carried  
765 out genome sequence analysis. J.H., and N.A. contributed new reagents, R.W.M, S.J.D., D.B, C.J.S,  
766 F.M., S.C, T.G.C and T.R. contributed to study design. F.M., R.H. and R.W.M wrote the paper. All the  
767 authors discussed the results and commented on the manuscript.

768

#### 769 **Competing Financial Interests statement**

770 The authors declare no competing financial interests.

771

772

773

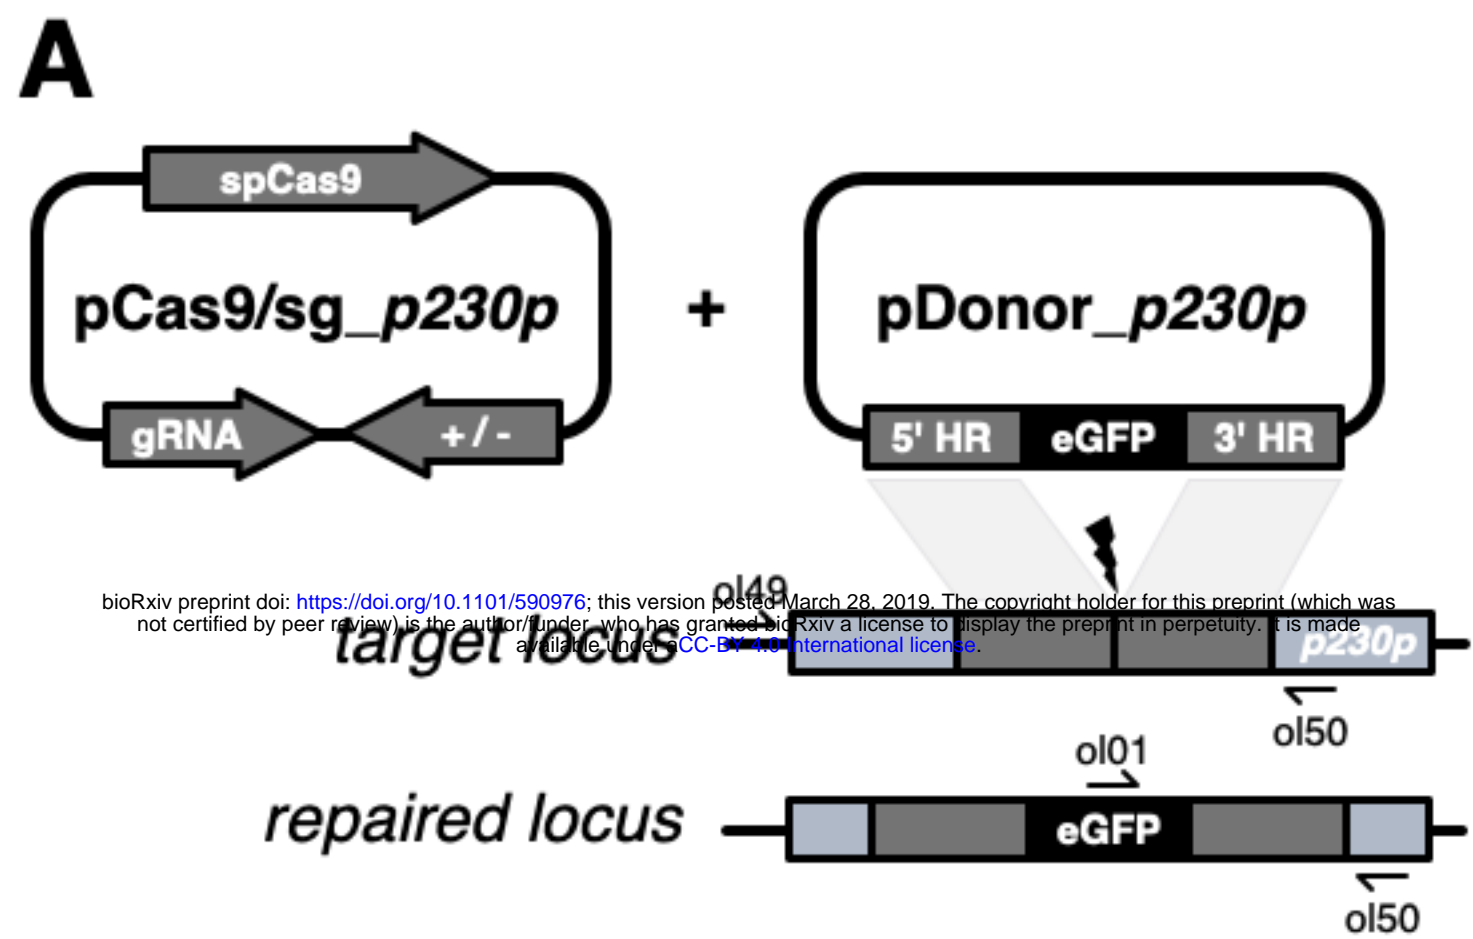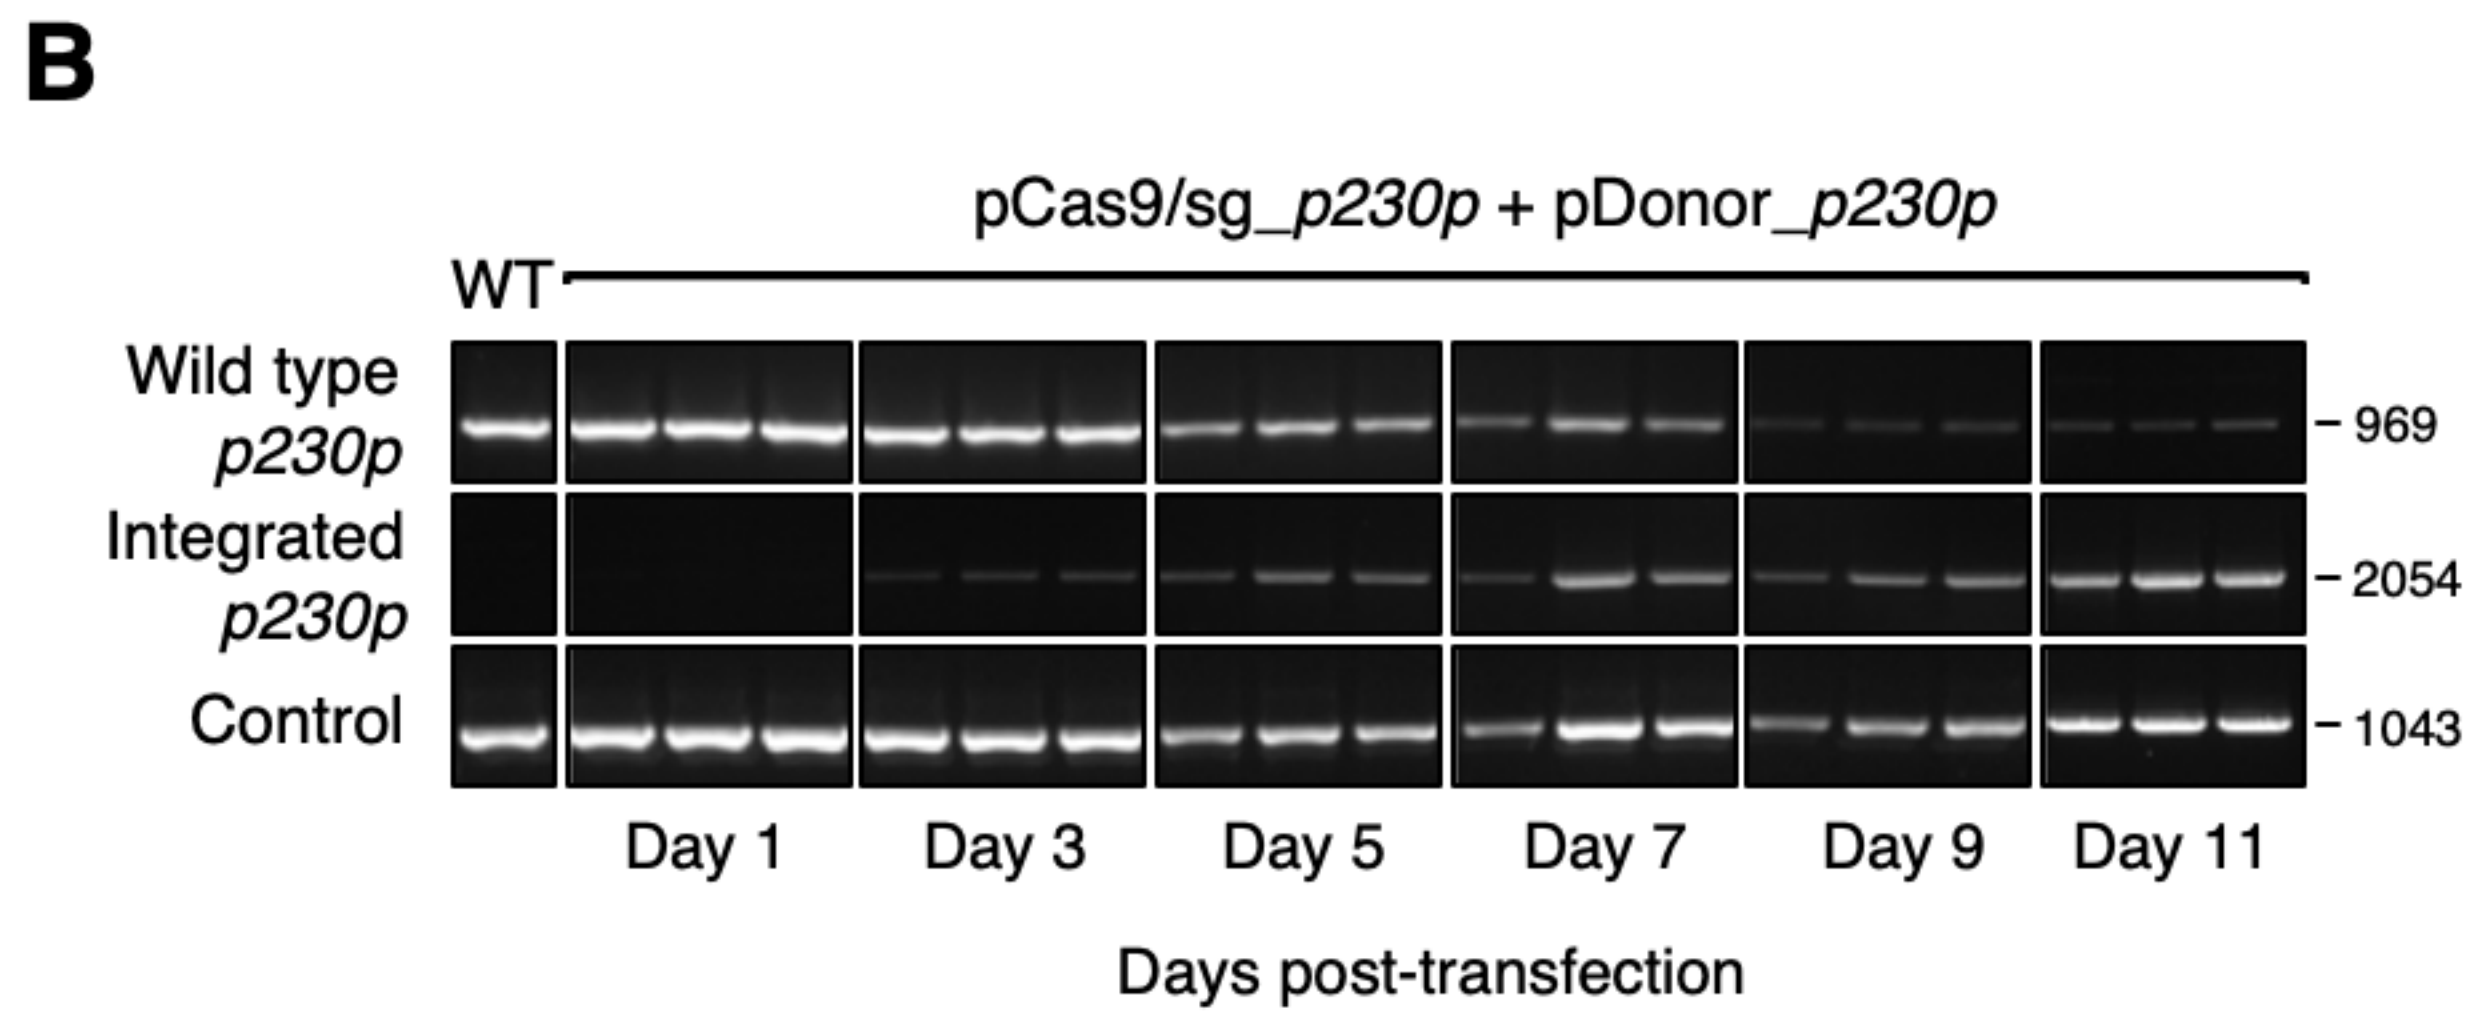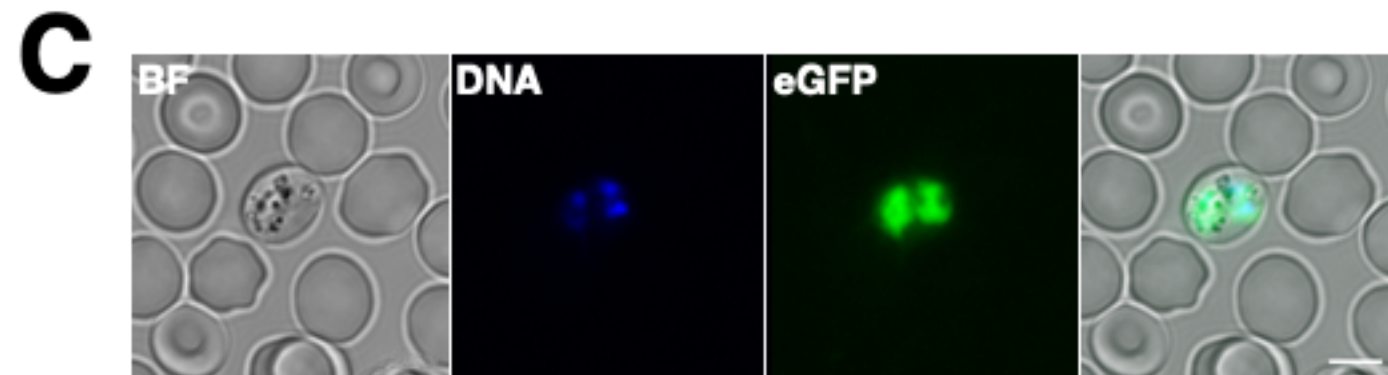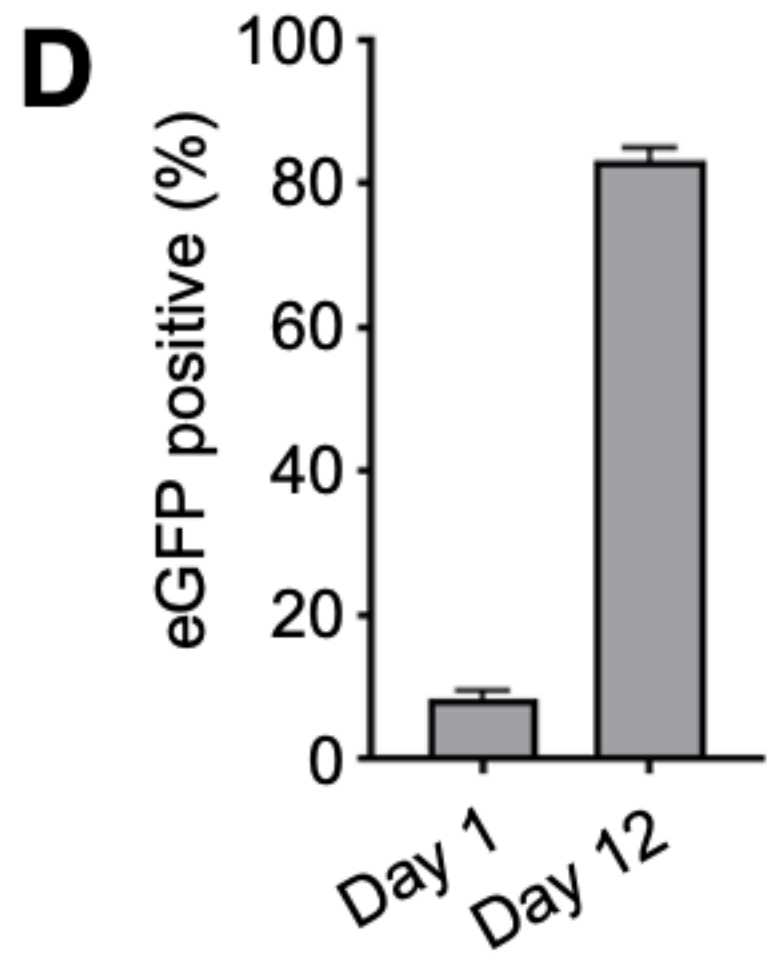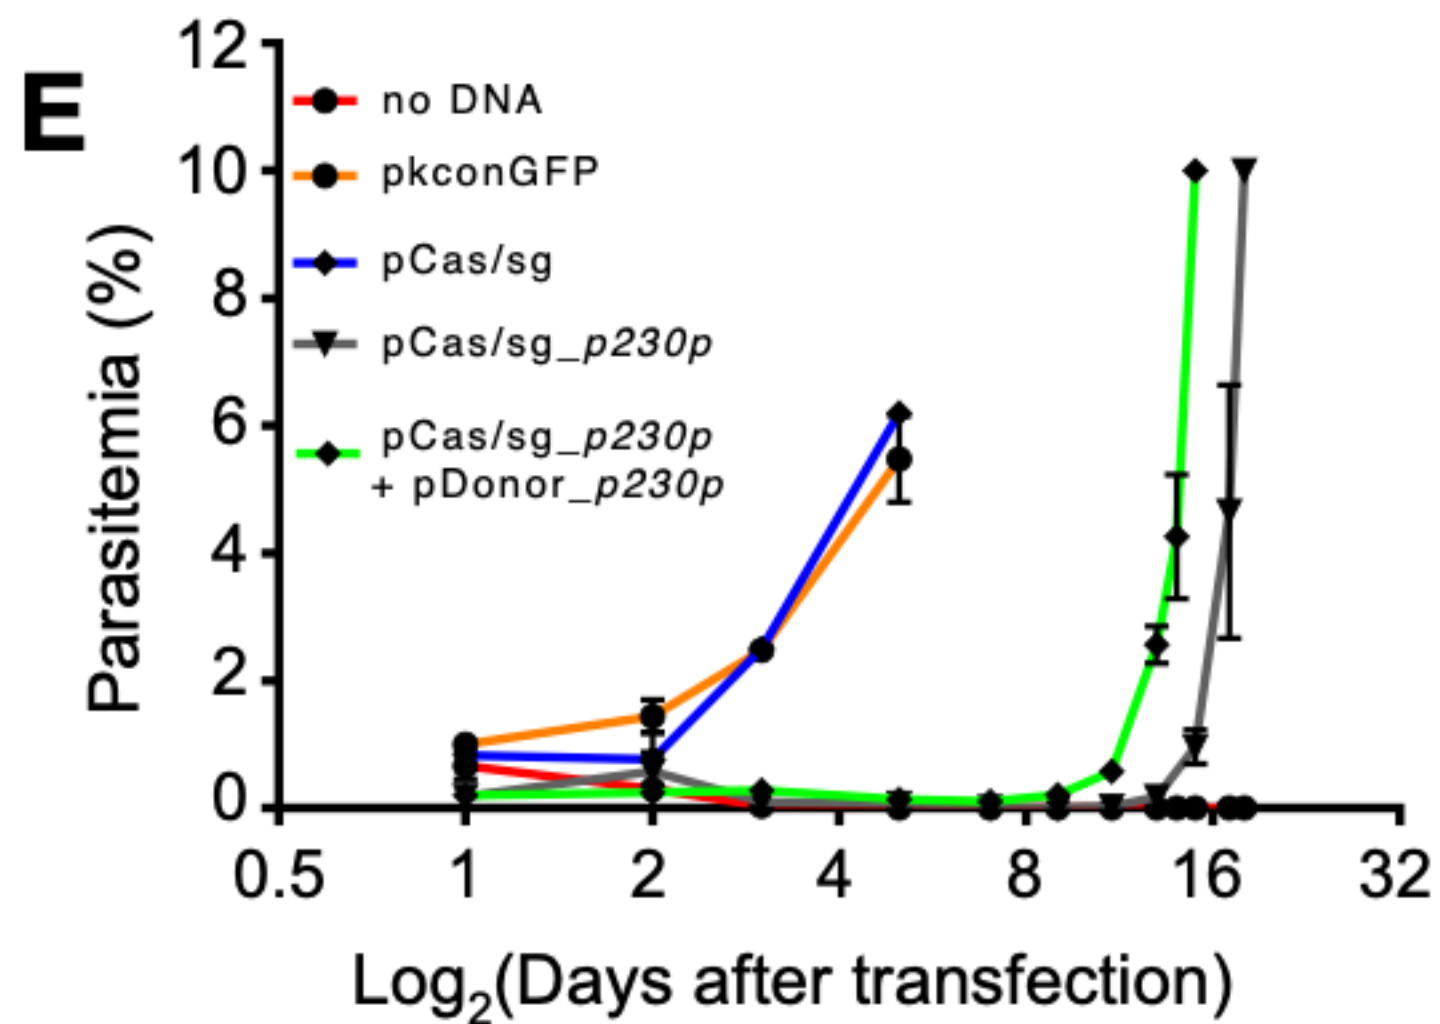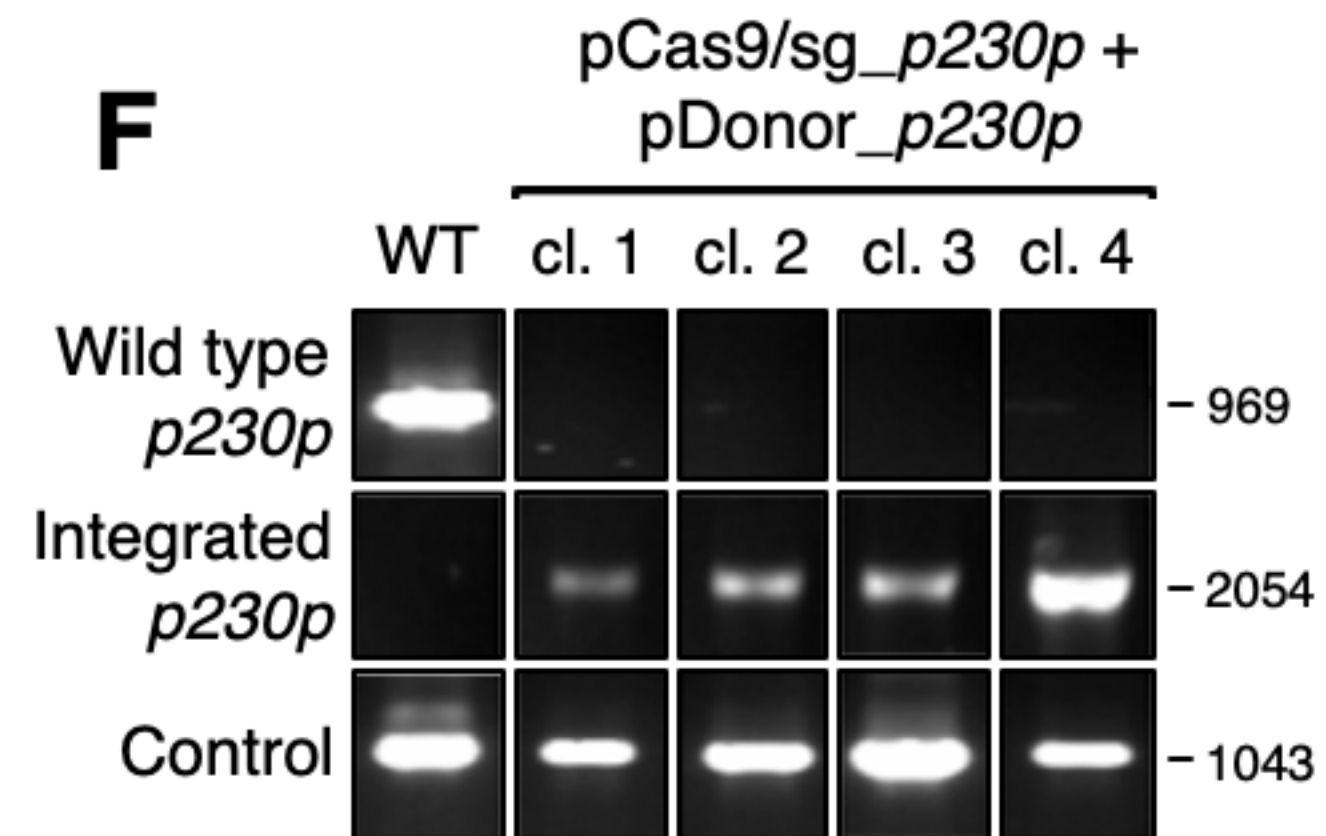

774 **Figure 1: CRISPR-Cas9 genome editing in *P. knowlesi*.**

775 (A) Schematic of CRISPR-Cas9 strategy. Integration of the eGFP expression cassette into the target  
776 *p230p* locus via homologous recombination. Arrows indicating oligo positions for diagnostic PCRs. (B)  
777 Parasites transfected with pCas9/sg\_ *p230p* and pDonor\_ *p230p* plasmids were analysed with diagnostic  
778 PCRs on consecutive days after transfection. PCR reactions detecting the wild type locus (ol49+ol50),  
779 integration locus (ol01+ol50) and a control PCR targeting an unrelated locus (ol75+ol76) using  
780 approximately 3 ng/μl genomic DNA. For each day, three transfections are shown. (C) Representative  
781 live microscopy image of eGFP positive schizont transfected with pCas9/sg\_ *p230p* and pDonor\_ *p230p*  
782 plasmids. Scale bar represents 5 μm. (D) Proportion of eGFP positive parasites (%) counted after  
783 transfection with pCas9/sg\_ *p230p* and pDonor\_ *p230p* plasmids to show transfection efficiency on day  
784 1 and integration efficiency after reaching culture reached 0.5 % parasitemia (day 12) (n=3). Error bars  
785 denote ± 1 SD. (E) Graph shows change in parasitemia (%) over time for parasite lines transfected with  
786 the dual plasmid Cas9 targeting vectors (pCas9/sg\_ *p230p* and pDonor\_ *p230p*), controls without an  
787 sgRNA (pCas9/sg), without homology repair template DNA (pCas9/sg\_ *p230p*) or with no DNA. A fifth  
788 control reaction shows outgrowth of an episomal control plasmid (pkconGFP) (n=3). Parasites were  
789 placed under drug selection on day 1. Error bars denote ± 1 SD (F) Parasites transfected with  
790 pCas9/sg\_ *p230p* and pDonor\_ *p230p* plasmids were cloned by limiting dilution and four clones  
791 analysed by diagnostic PCR.  
792



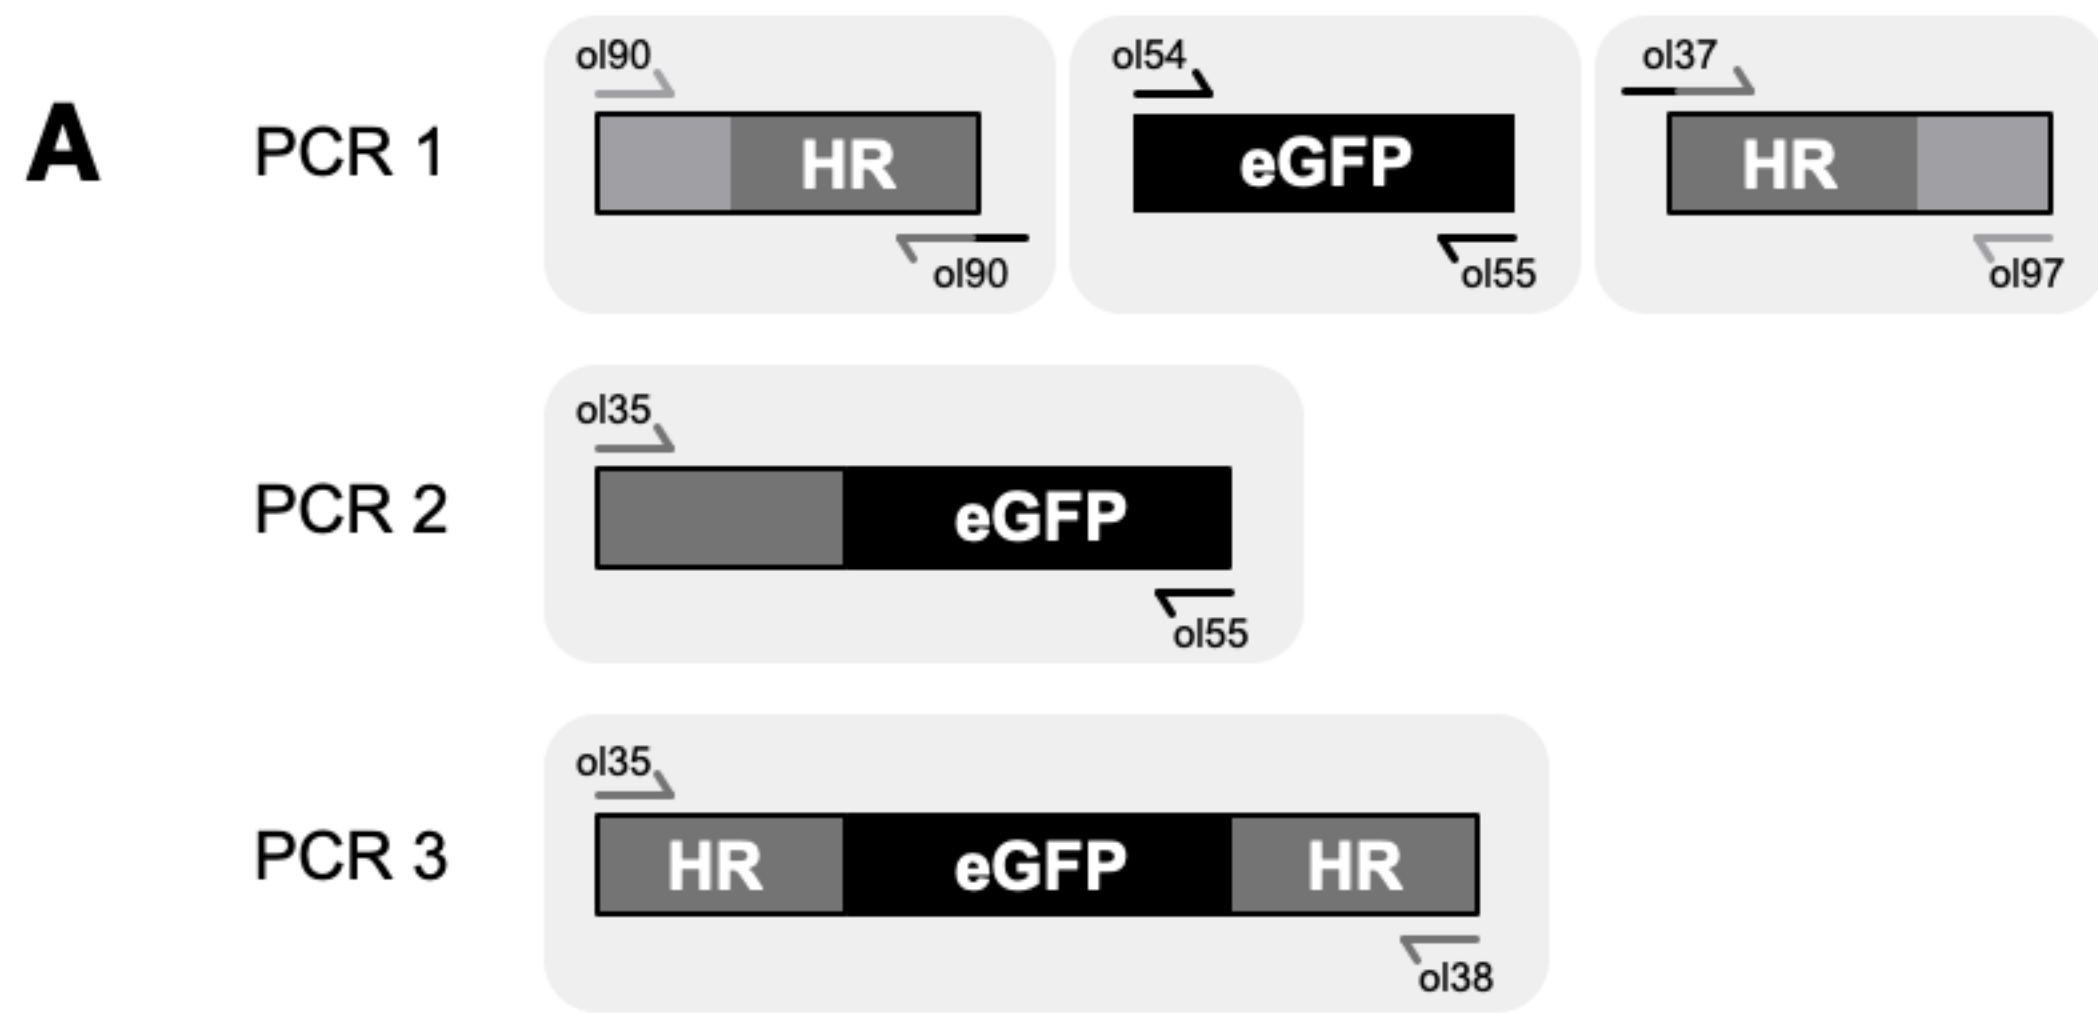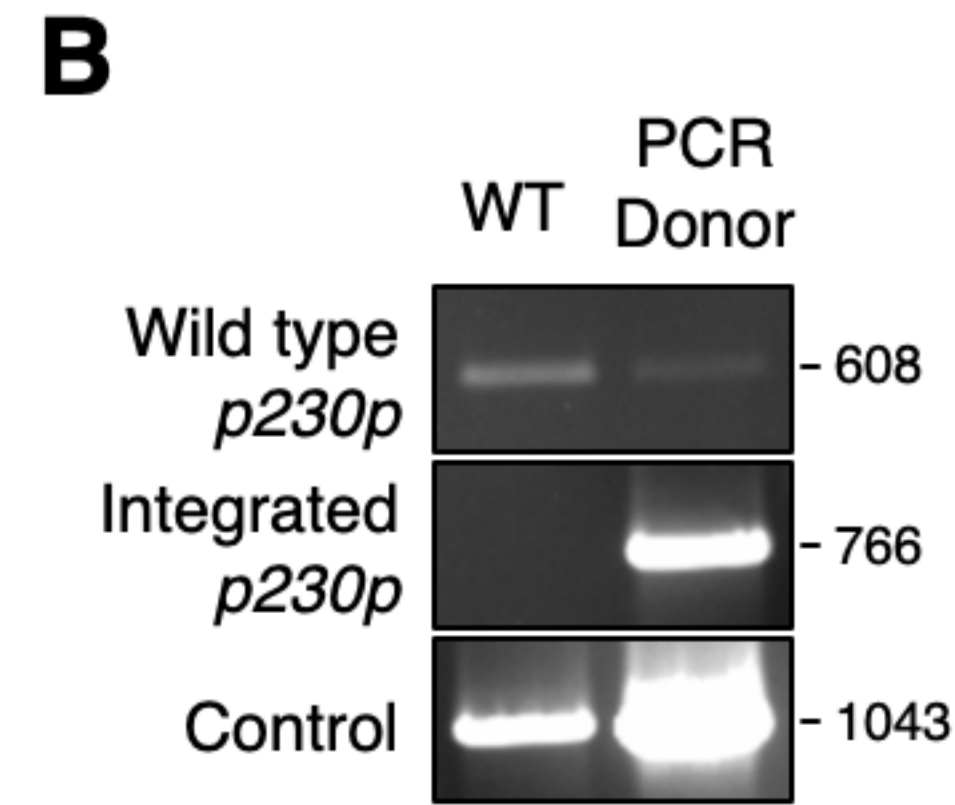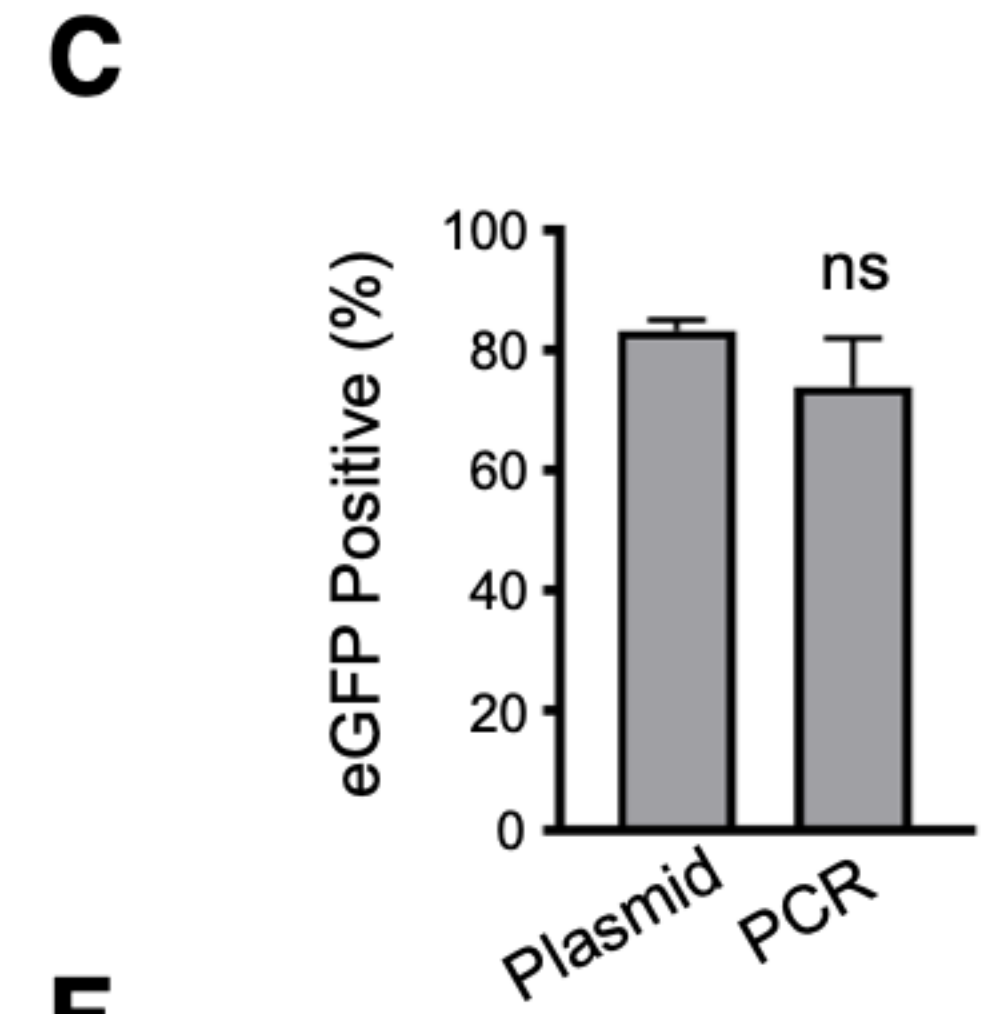

**D**

bioRxiv preprint doi: <https://doi.org/10.1101/590976>; this version posted March 28, 2019. The copyright holder for this preprint (which was not certified by peer review) is the author/funder, who has granted bioRxiv a license to display the preprint in perpetuity. It is made available under aCC-BY 4.0 International license.

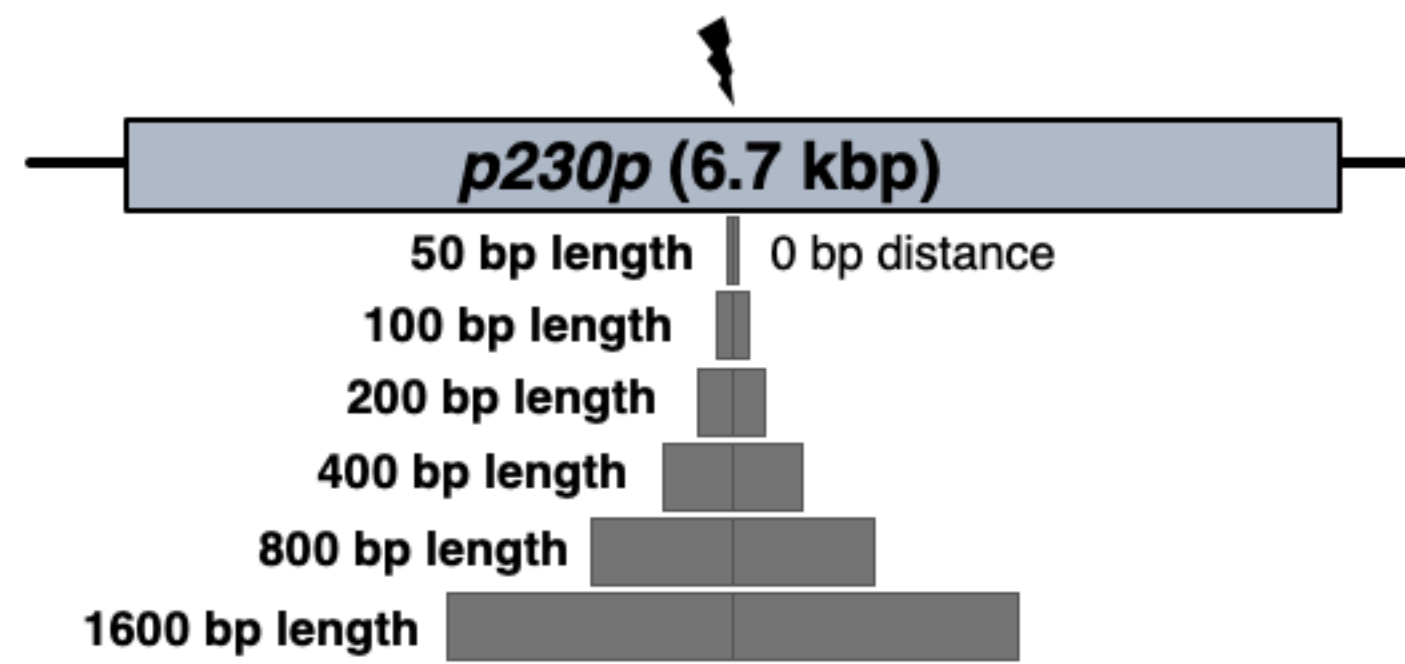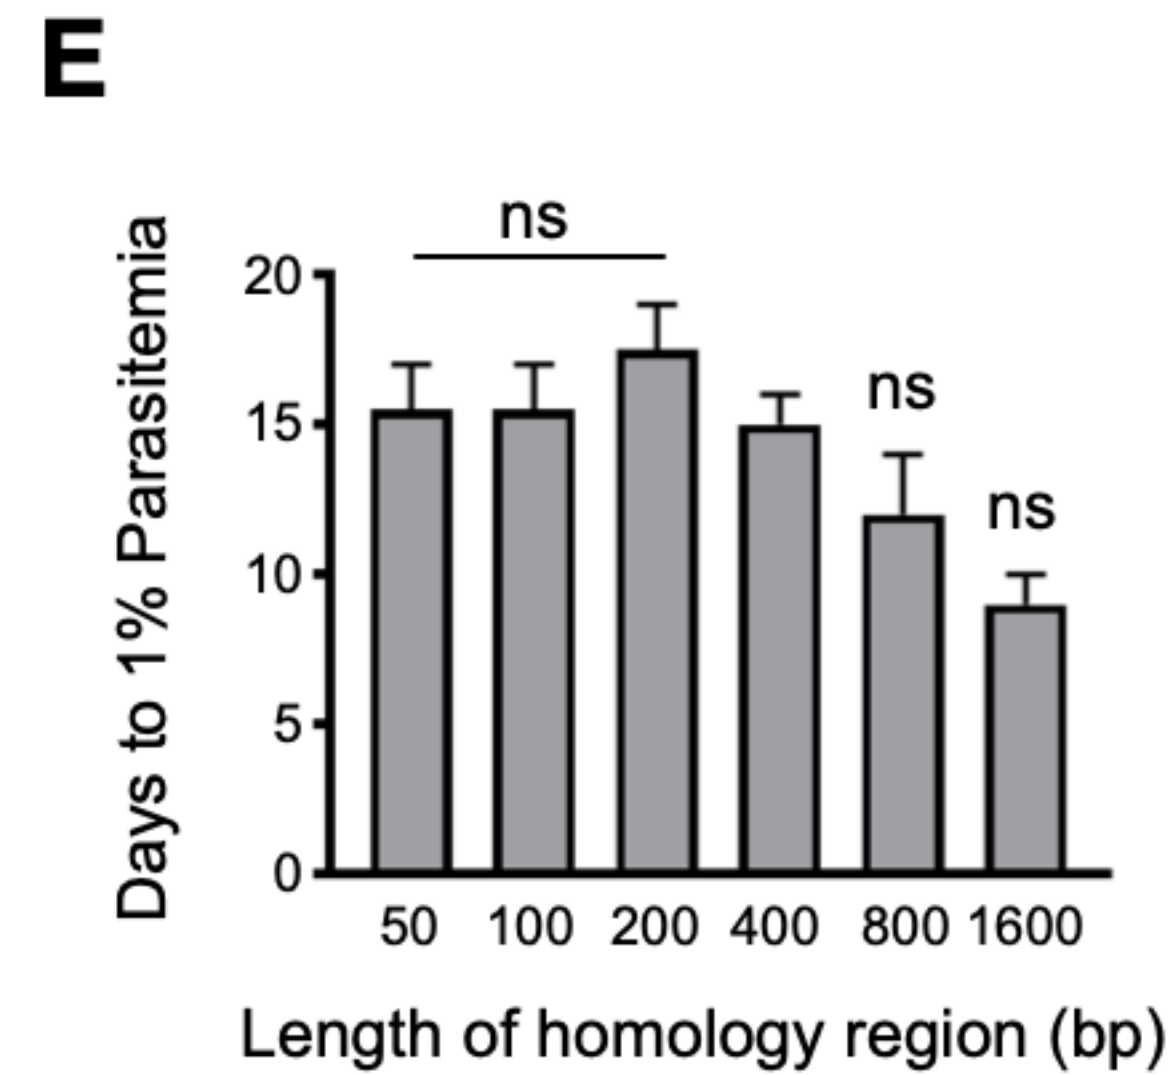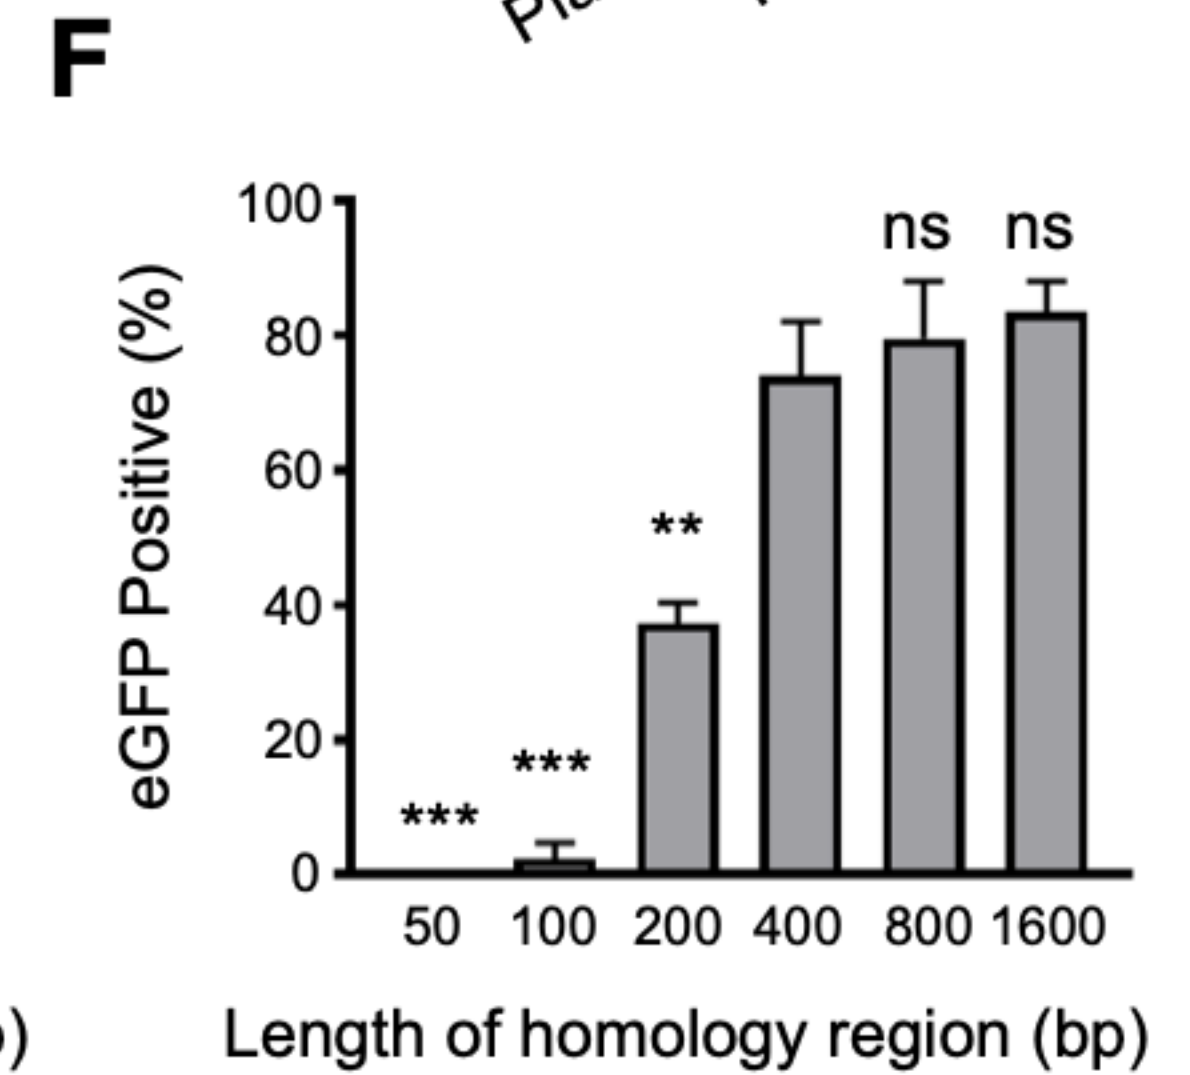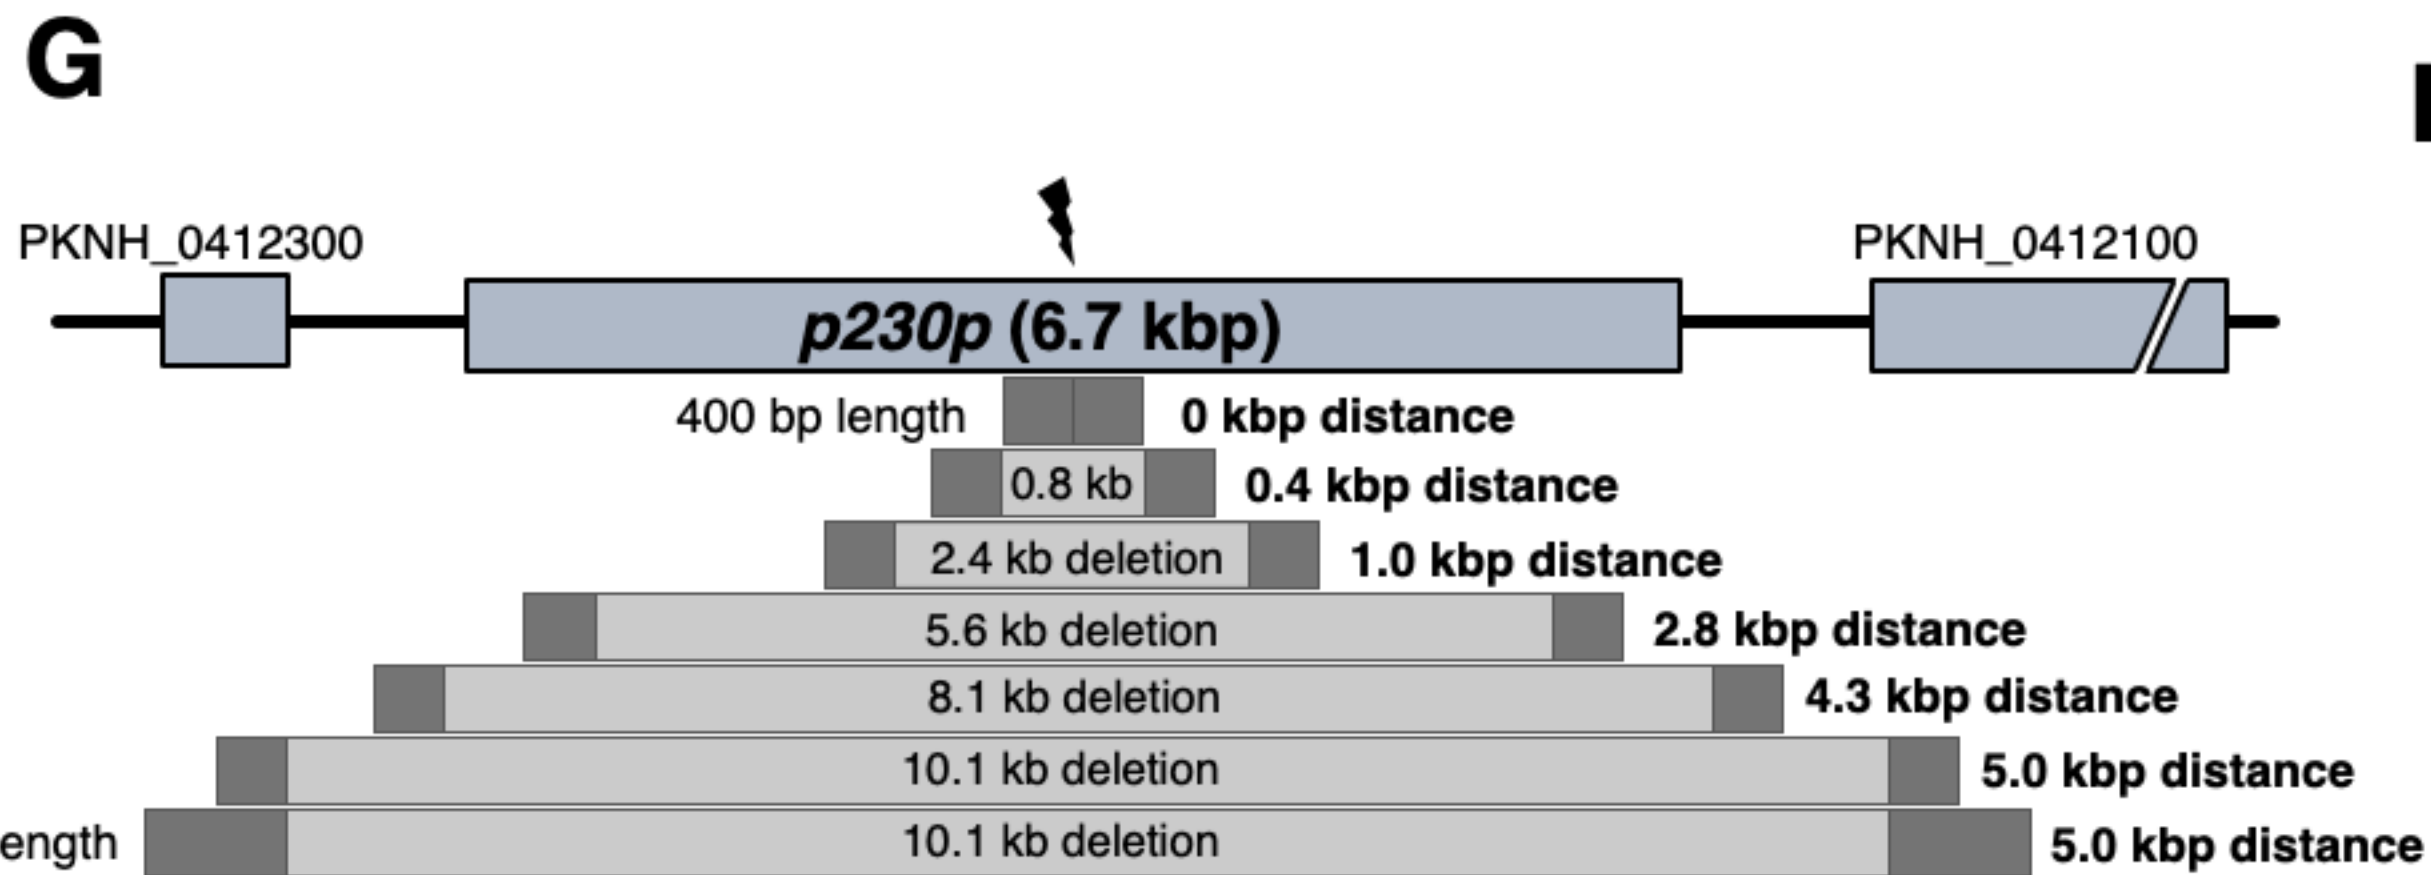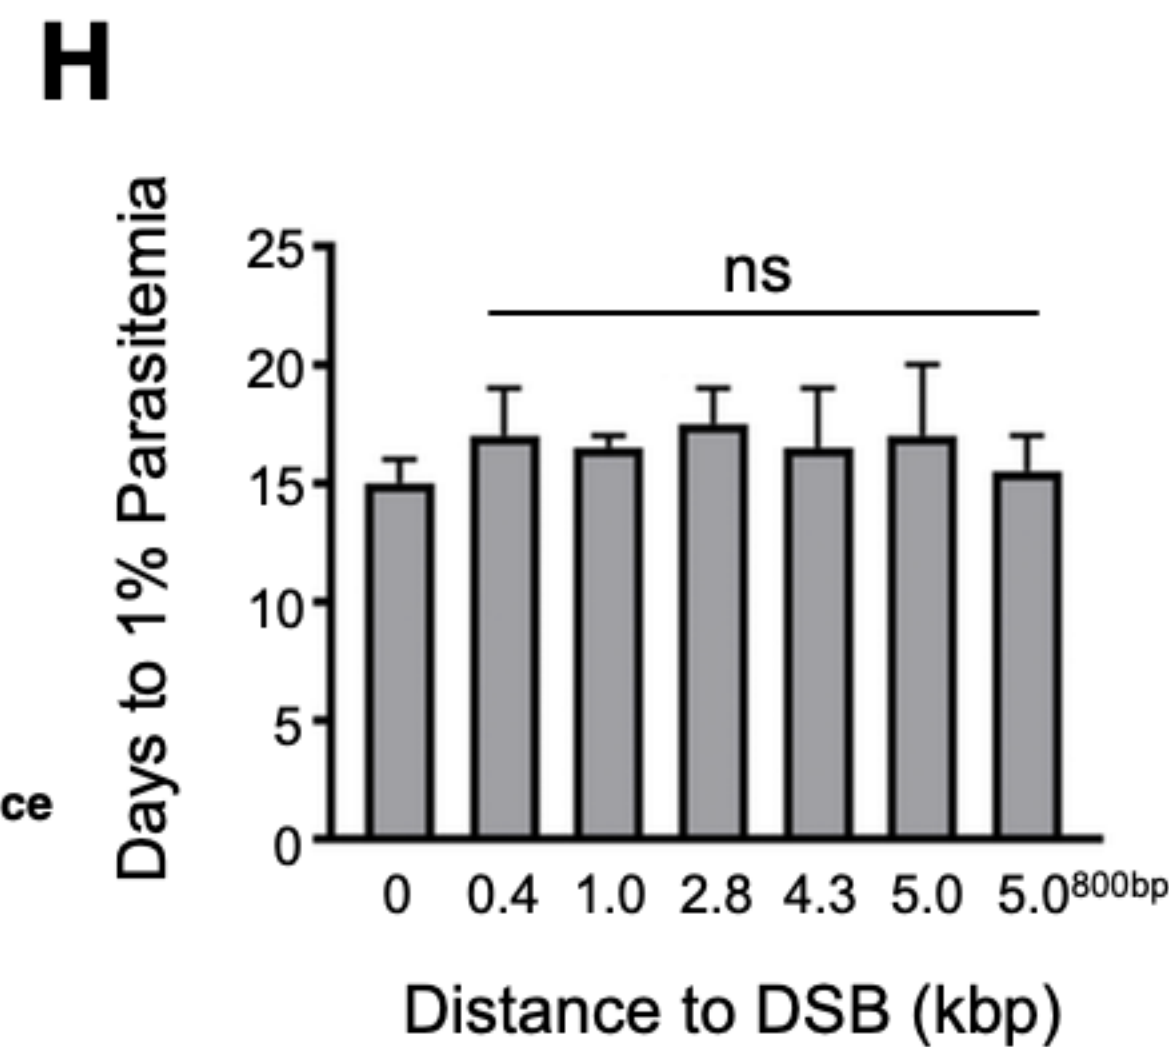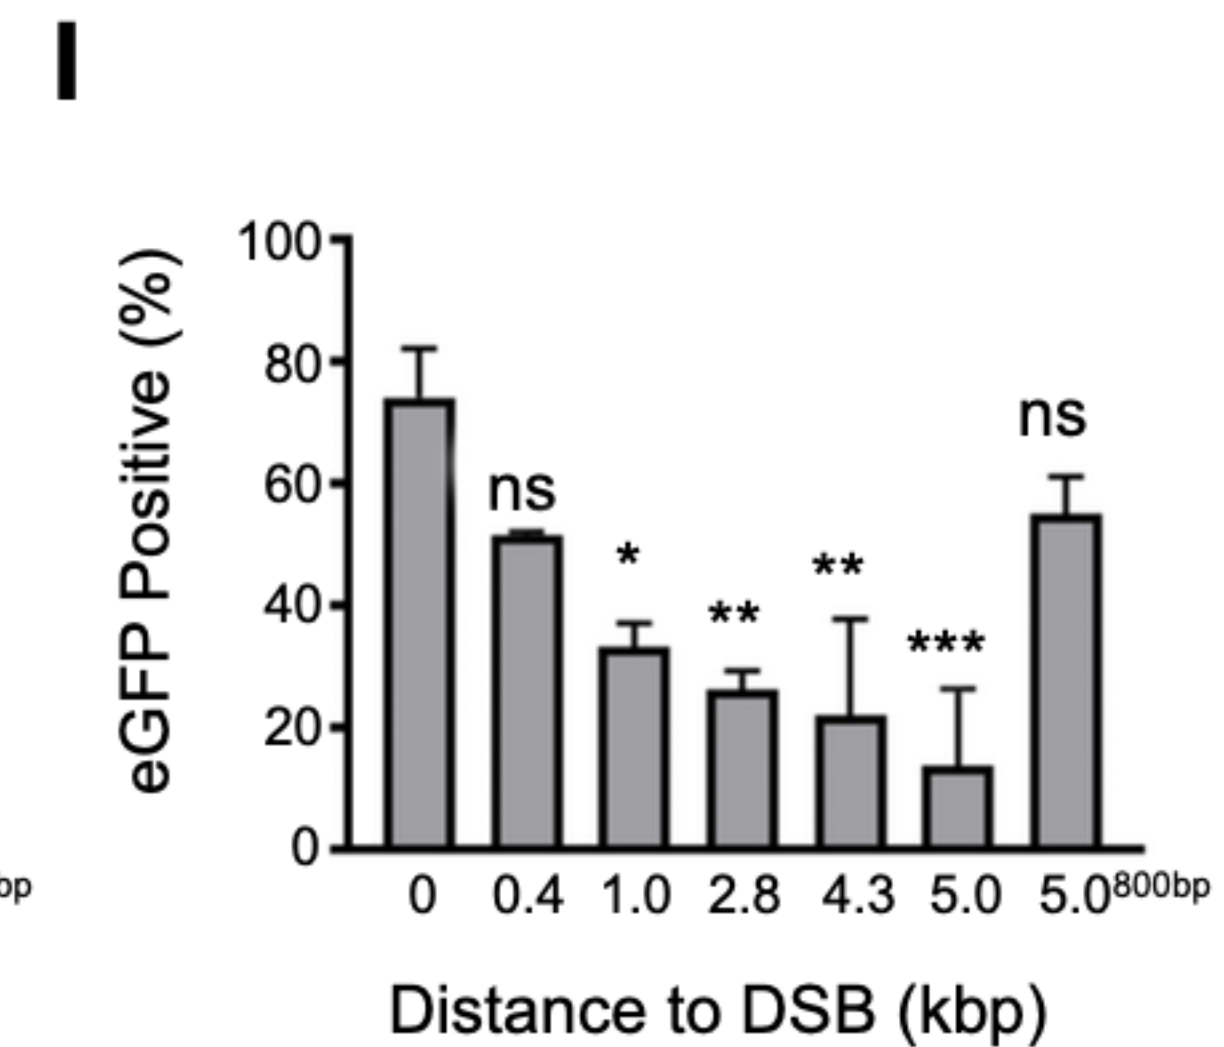

793 **Figure 2: Fusion PCR based approach enables cloning-free production of homology repair**  
794 **templates and evaluation of key parameters for efficient homology-driven repair**

795 (A) Schematic of the nested PCR method to generate linear donor constructs for transfection. First,  
796 homology regions (HRs) and eGFP cassette were amplified by PCR with 20 bp overhangs and gel  
797 extracted. In a second nested step HR1 and eGFP cassette were fused and again in the third step the  
798 HR1-eGFP product was fused with HR2. (B) Parasites transfected with pCas9/sg\_ *p230p* and PCR  
799 repair template (PCR donor), comprised of an eGFP cassette and 400bp HRs, were analysed with  
800 diagnostic PCRs amplifying the wild type *p230p* locus (ol49+ol50), integration locus (ol01+ol50) and a  
801 control targeting an unrelated locus (ol75+ol76). (C) After selection for integration, the proportion of  
802 eGFP positive parasites (%) was determined by fluorescent microscopy and compared between Cas9  
803 transfections made with 400 bp HR plasmid (pDonor\_ *p230p*) or 400 bp HR PCR donor DNA. Data  
804 points represent the mean and error bars indicate  $\pm 1$  SD of two independent experiments (n=2).  
805 (D) The *p230p* locus was targeted using PCR donor DNA constructs using HRs with 50-1600 bp  
806 length. The bar chart shows, for each of the constructs with HRs of 50 to 1600 bp length, (E) the  
807 number of days for transfections to reach 1 % parasitemia and (F) proportion of eGFP positive parasites  
808 (%) after selection. All transfections were carried out in two independent experiments. (G) The *p230p*  
809 locus was targeted using PCR donor DNA constructs with HRs placed at varying distance from the  
810 Cas9 induced double strand break (DSB). For each construct based on distance to the DSB, the bar  
811 chart shows, (H) the number of days for transfections to reach 1 % parasitemia and (I) proportion of  
812 eGFP positive parasites (%) after selection. Data points represent the mean and error bars indicate  $\pm 1$   
813 SD of two independent experiments (n=2). Results were all compared to the 400 bp HR construct at 0  
814 kb from DSB using a one-way ANOVA with Dunnett's multiple comparison of means. ns > 0.05, \* <  
815 0.05, \*\* < 0.01, \*\*\* < 0.001.

816



**A**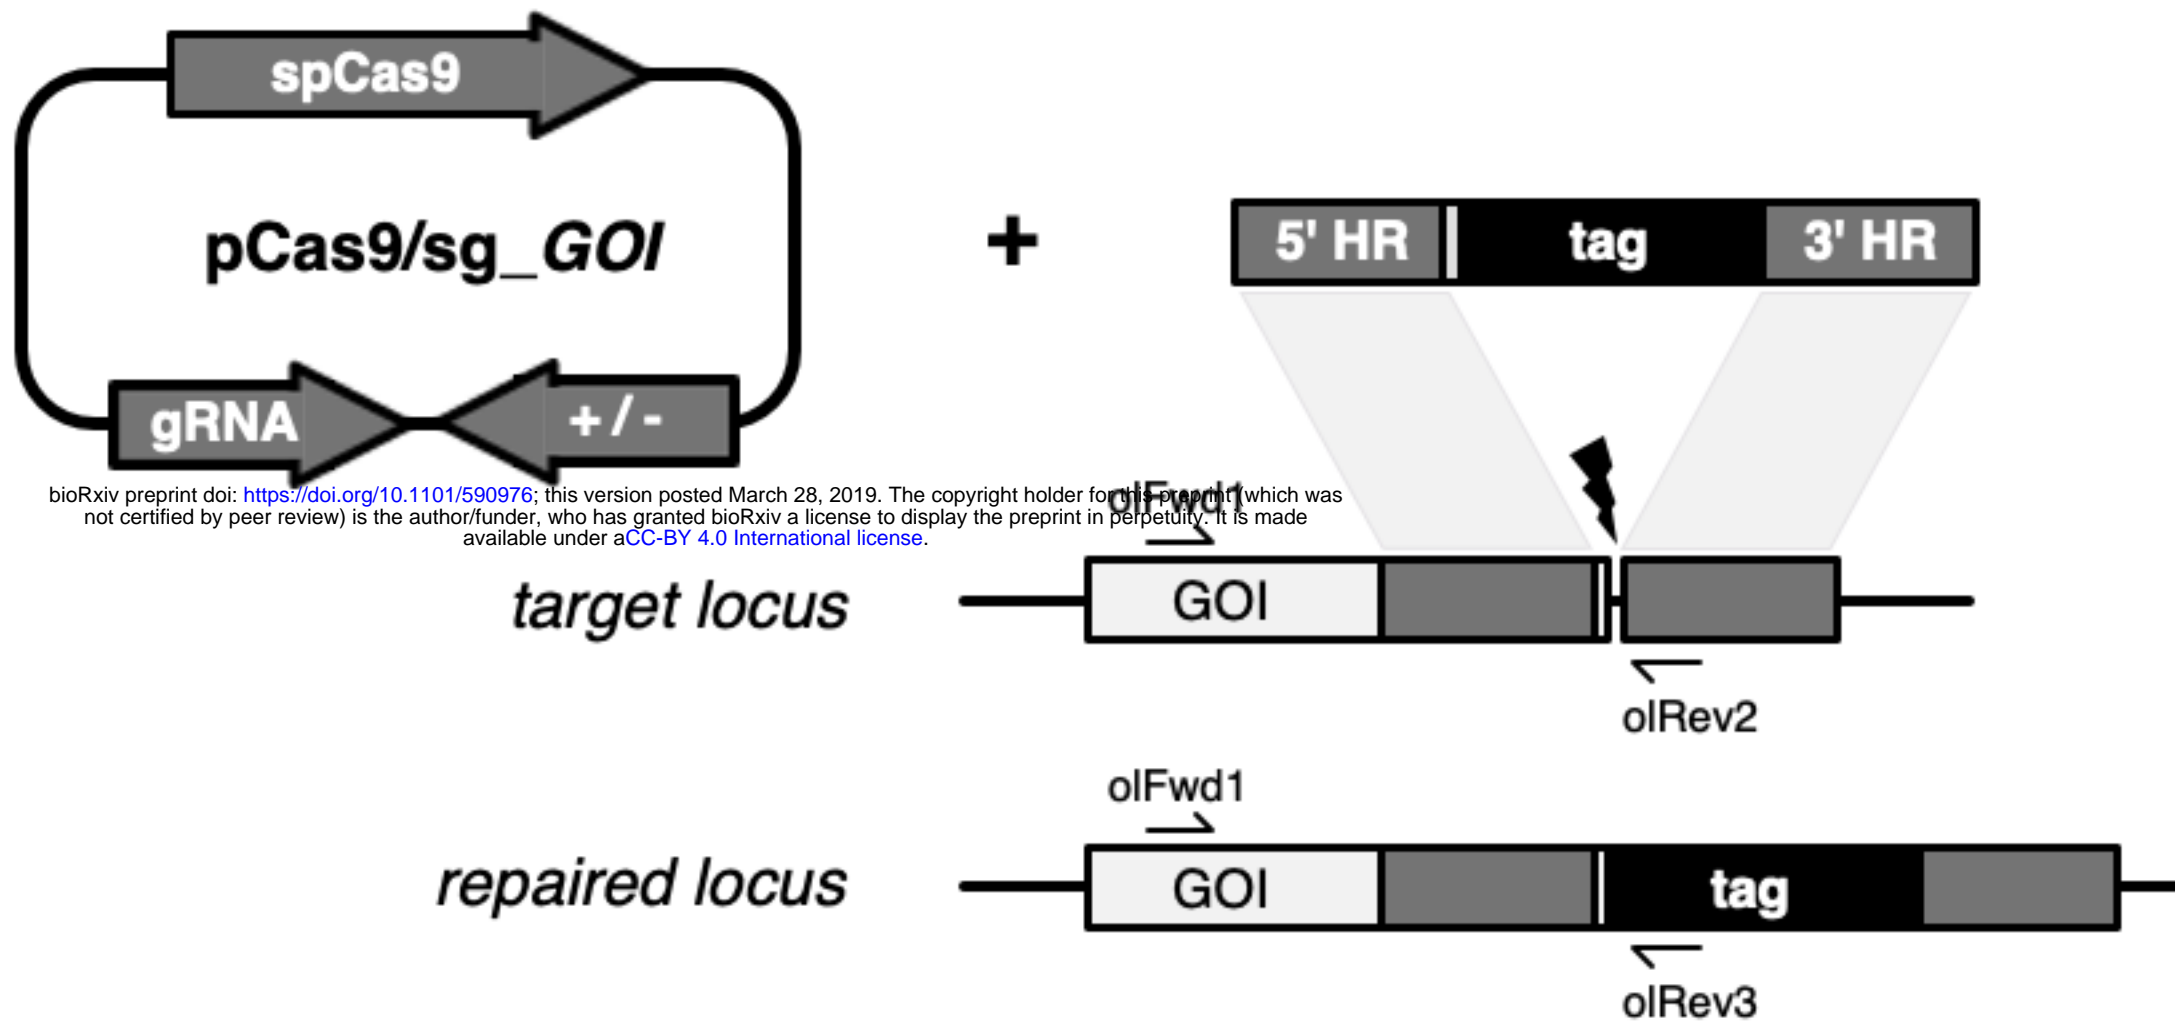**B**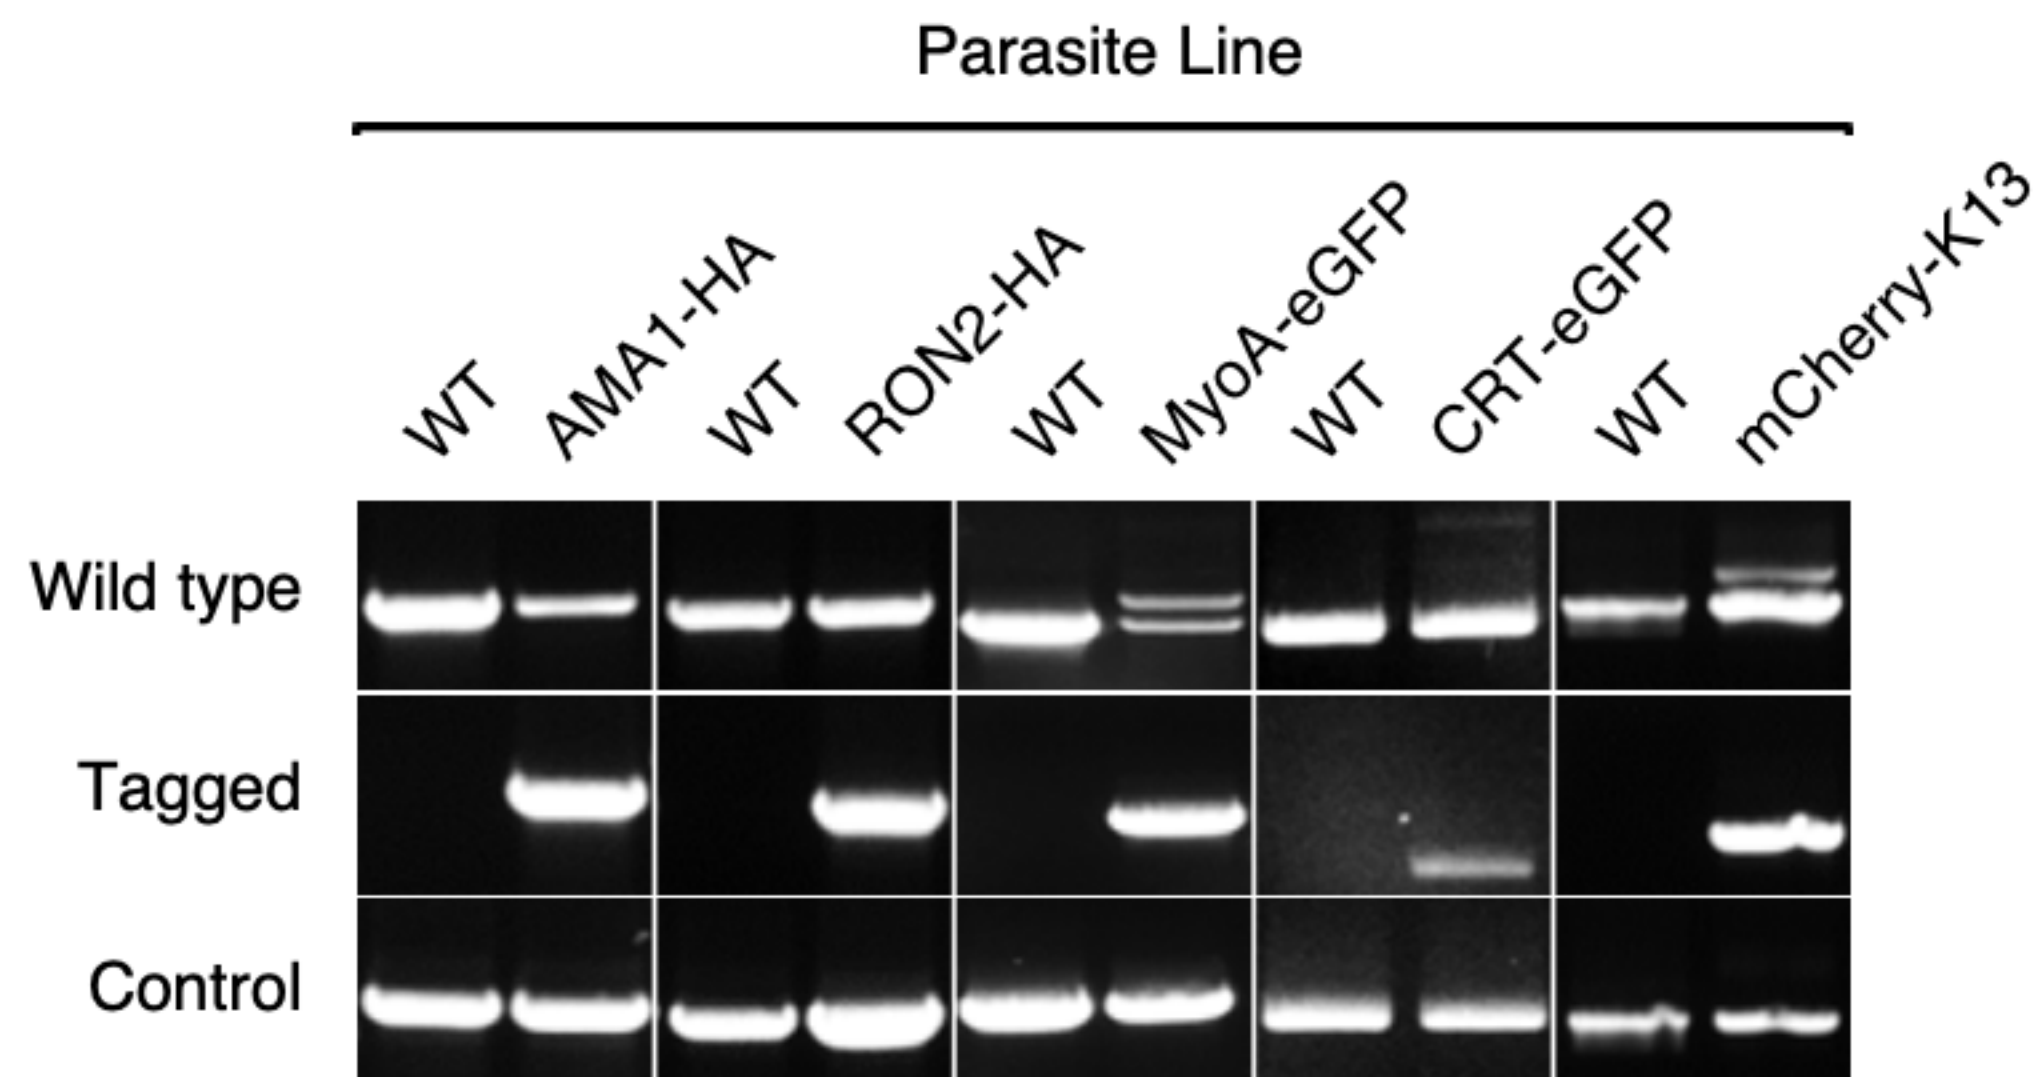**C**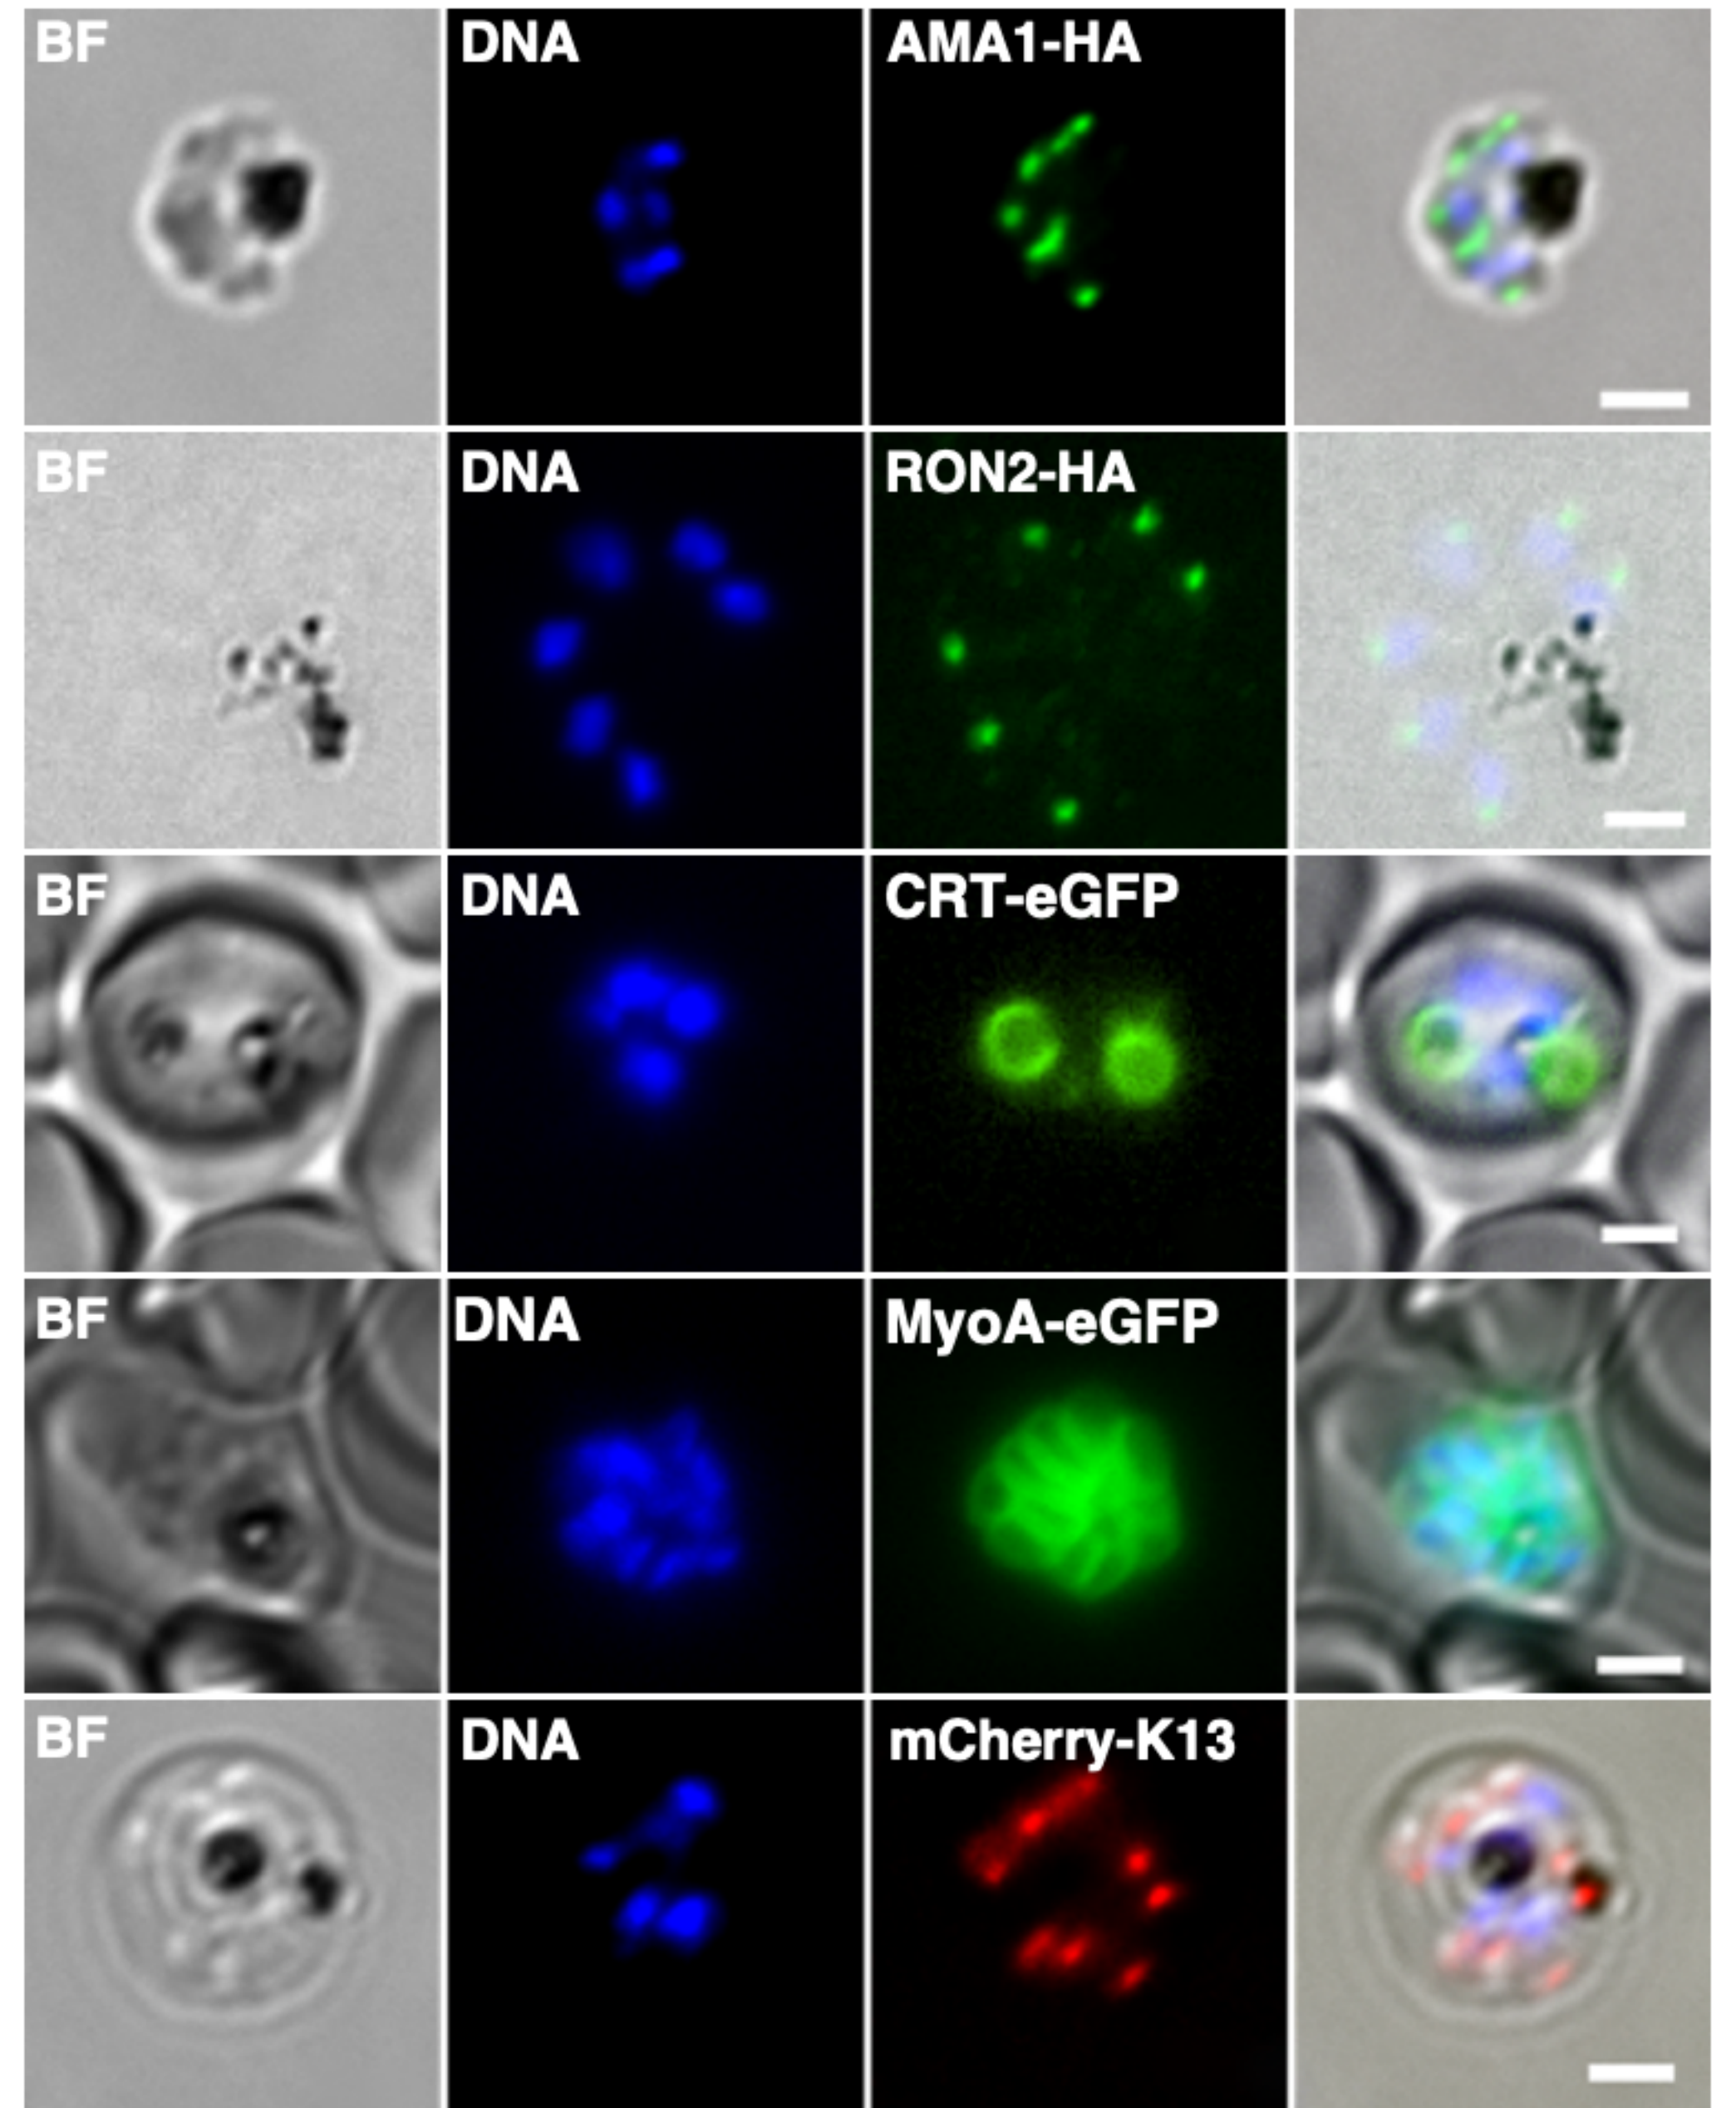



817 **Figure 3: CRISPR Cas9 PCR repair templates enable rapid and flexible tagging of parasite**  
818 **proteins**

819 (A) Schematic of CRISPR-Cas9 system for tagging. pCas9/sg plasmid with gene of interest (GOI)  
820 specific sgRNA, is combined with repair template generated by fusion PCR. Lightning bolt indicates  
821 Cas9 induced double strand break, which is repaired by insertion of the desired tag. (B) Diagnostic  
822 PCRs specific to each GOI locus were carried out to amplify the wild type locus (schematic positions  
823 olFwd1 +olRev2), integration locus (schematic positions olFwd1 +olRev3) and a control targeting an  
824 unrelated locus (ol75+ol76). List of specific primers used for each GOI is shown in Table S2. As no  
825 DNA is removed in this process, the wild type specific locus primers also generate slightly larger  
826 amplicons in tagged lines, which can be seen as double bands for both the Myosin A and K13 PCRs.(C)  
827 Representative immunofluorescence images of HA-tagged Apical membrane antigen-1 (AMA1-HA)  
828 and Rhoptry neck protein 2 (RON2-HA) parasite lines, and live cell imaging of Chloroquine Resistance  
829 Transporter-eGFP (CRT-eGFP), Myosin A-eGFP (MyoA-eGFP) and mCherry-Kelch13 (K13). Panels  
830 shows brightfield (BF), DNA stain (blue) and anti-tag antibodies/live fluorescence (green or red) of  
831 schizonts stage parasites from each line. Scale bars represent 2  $\mu$ m.

832

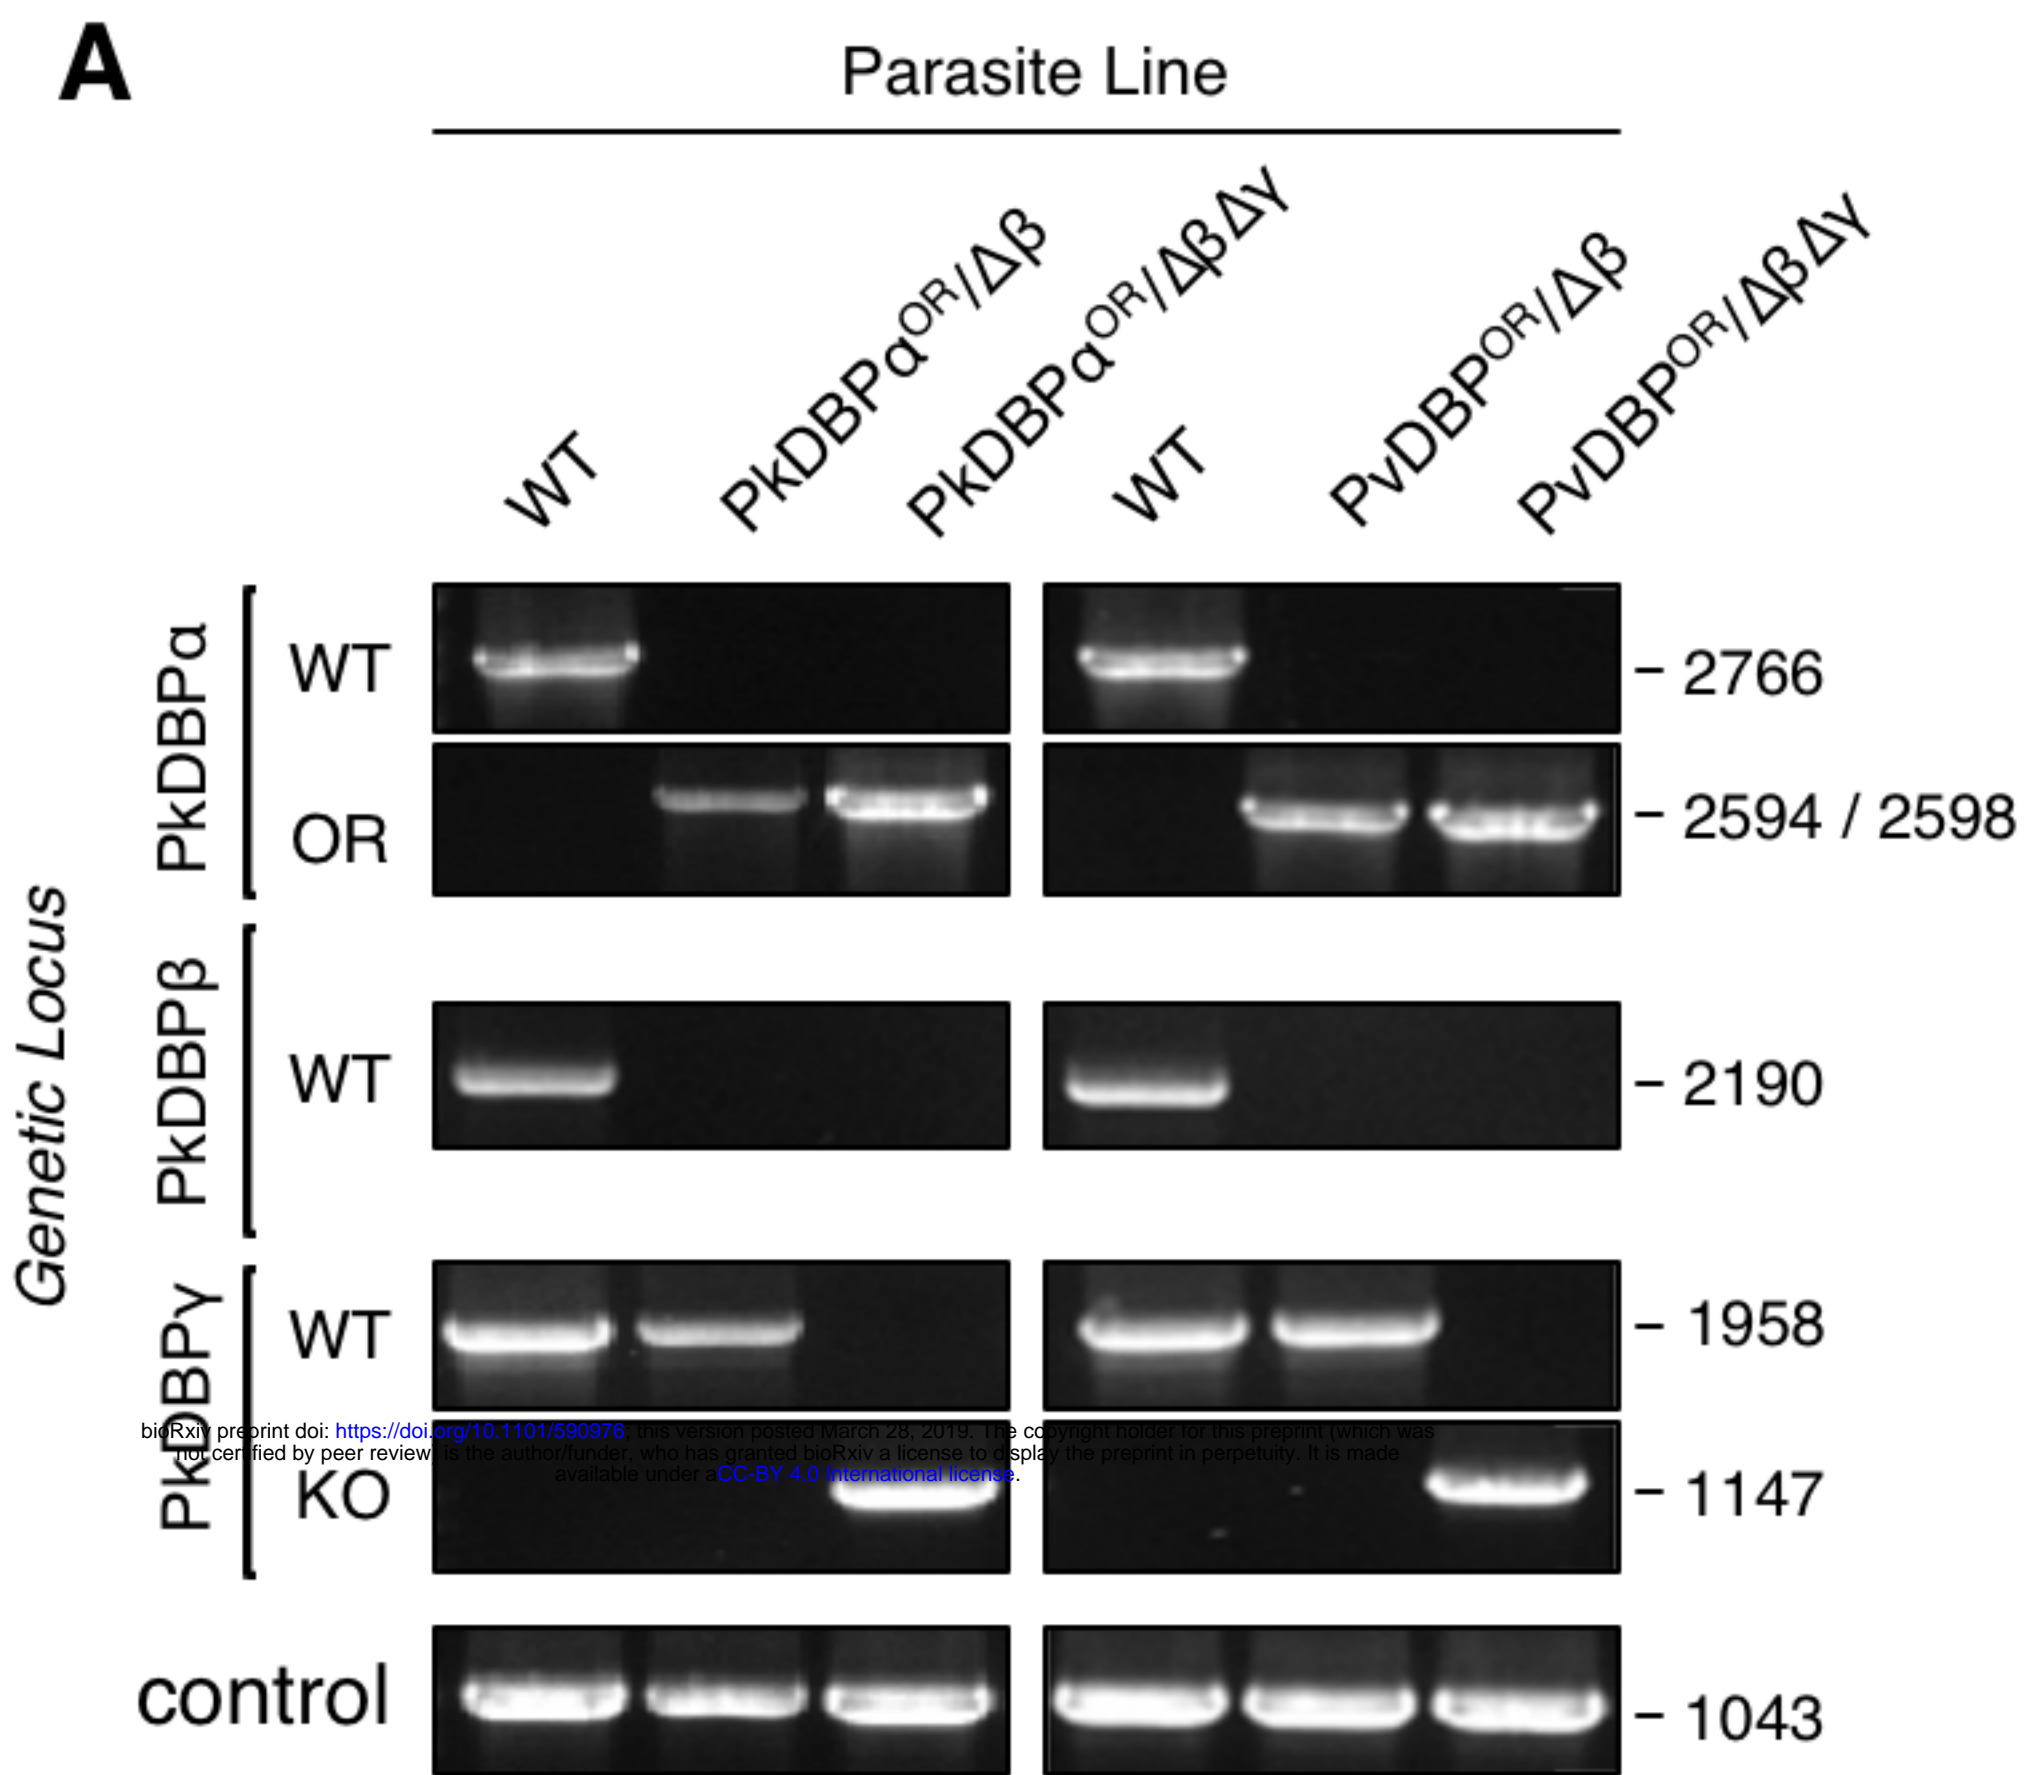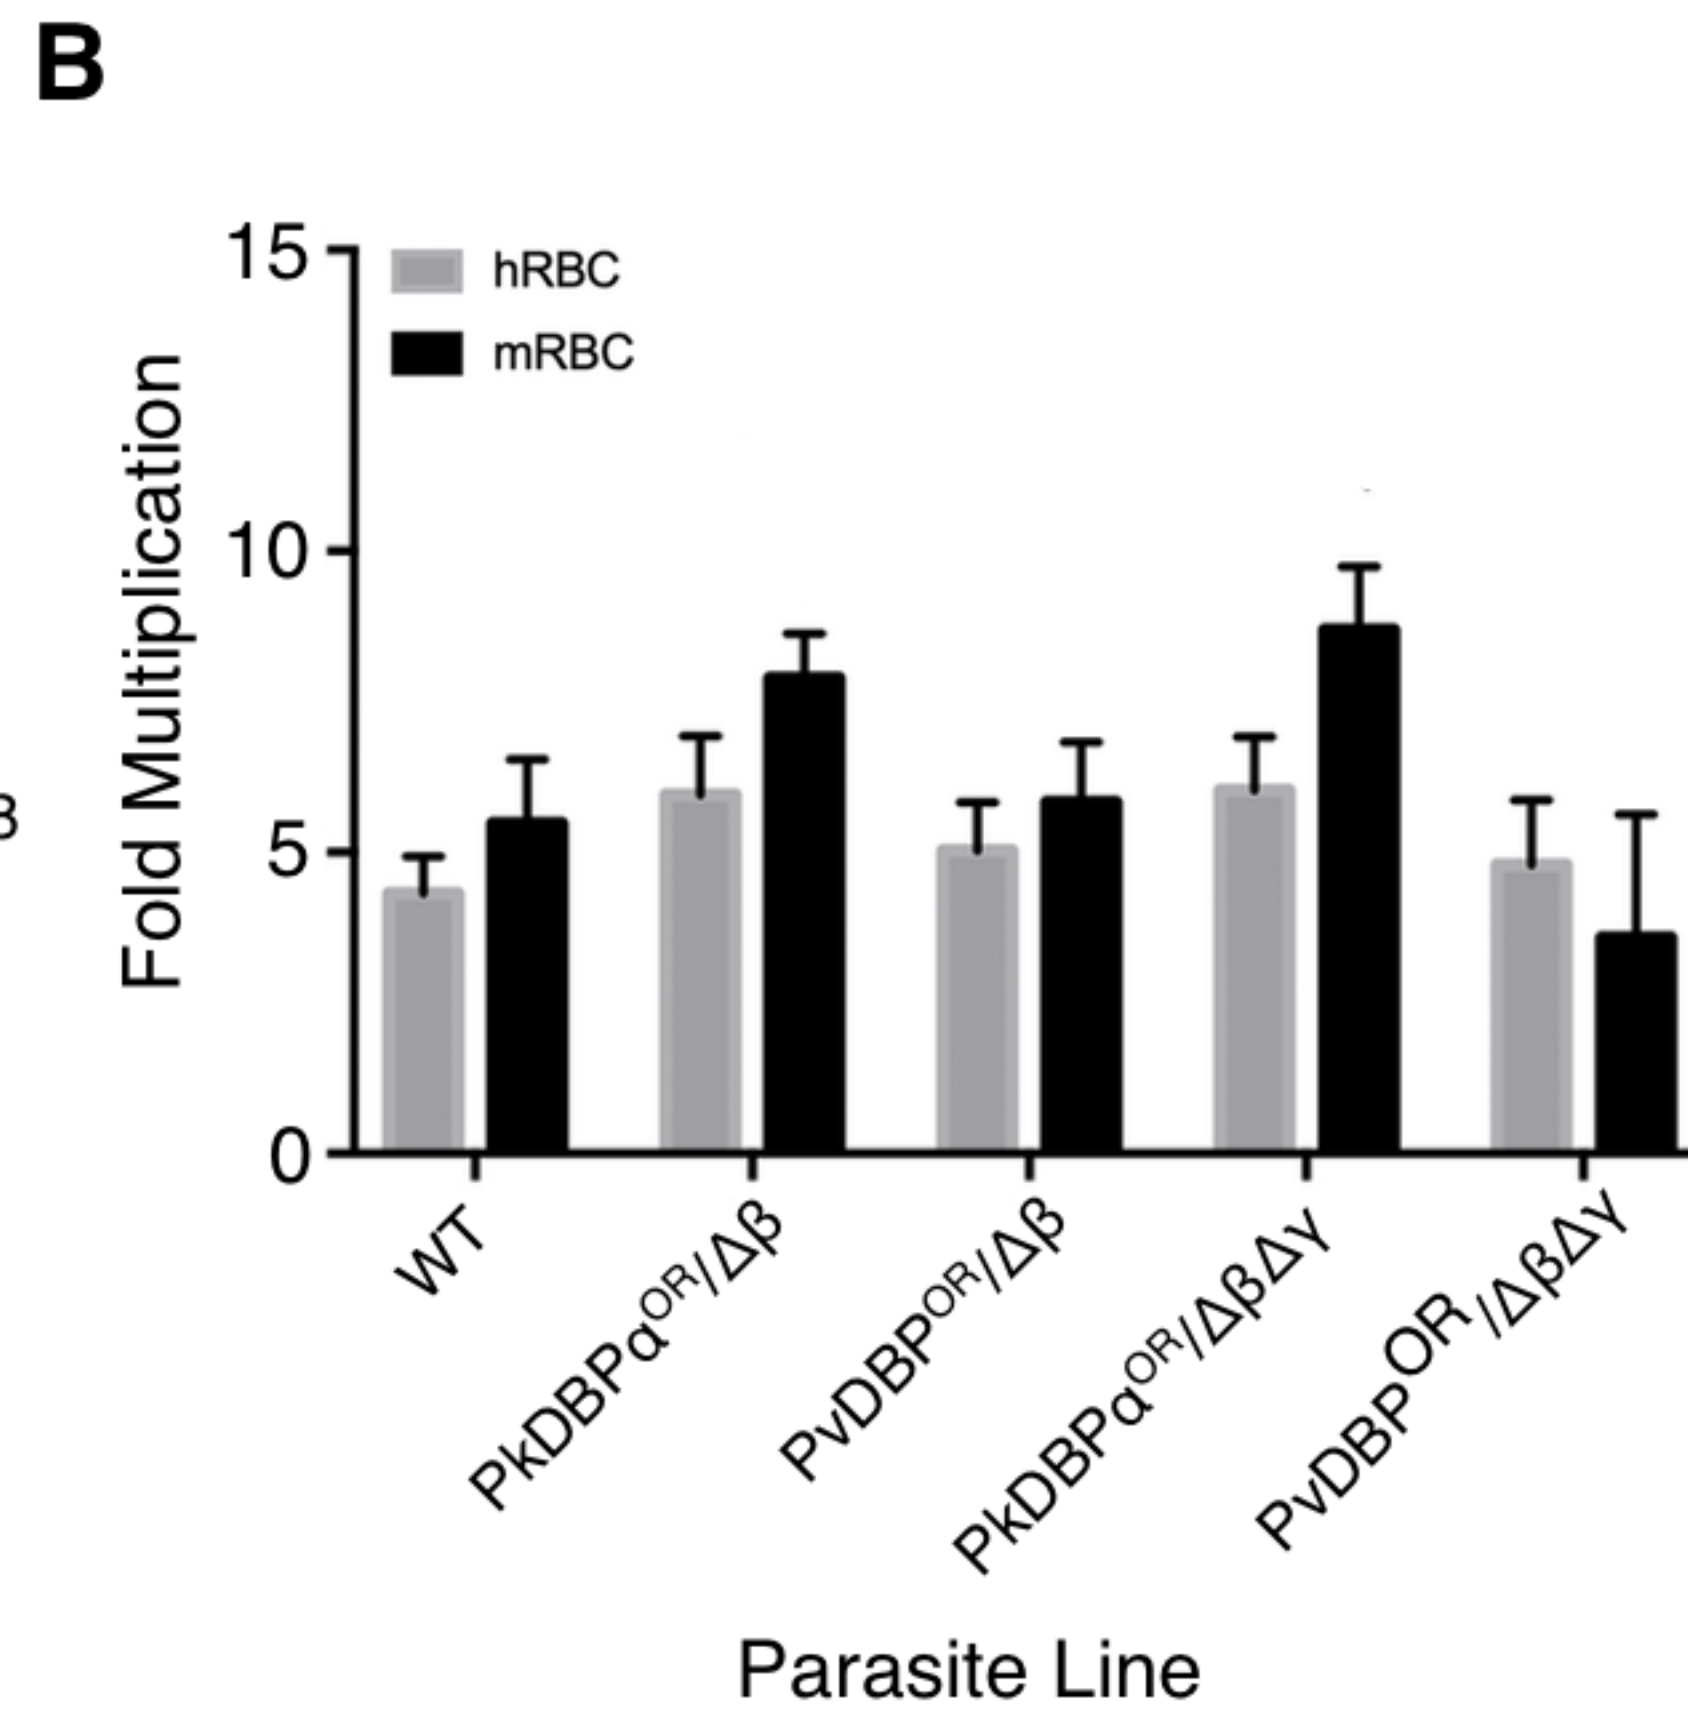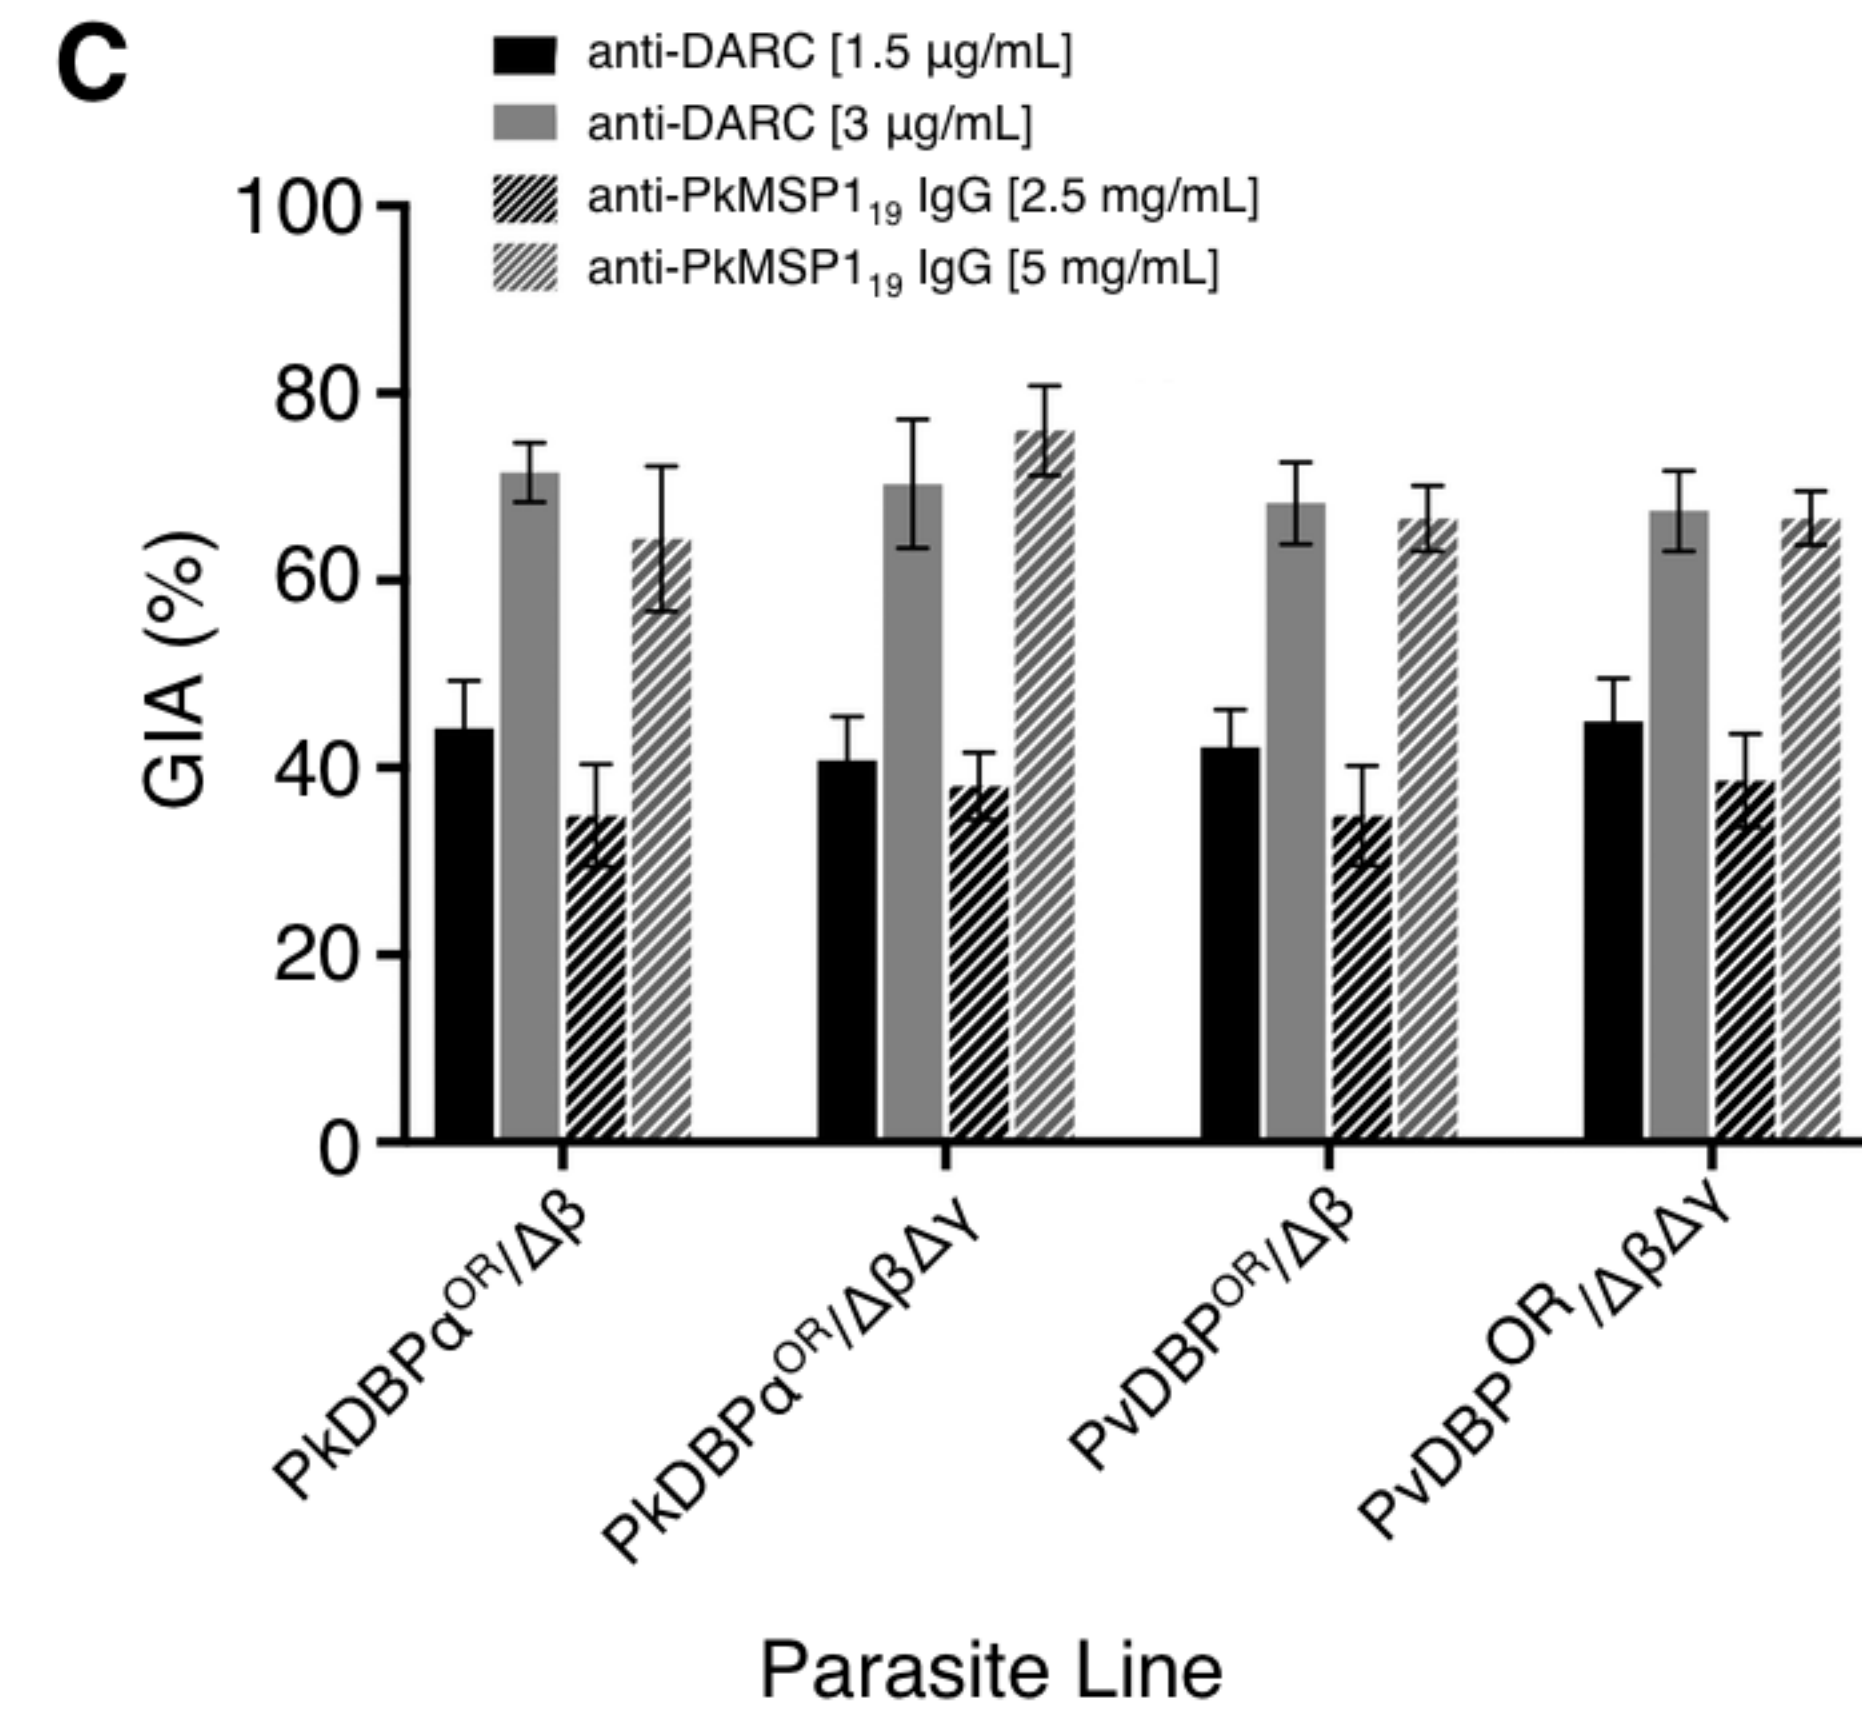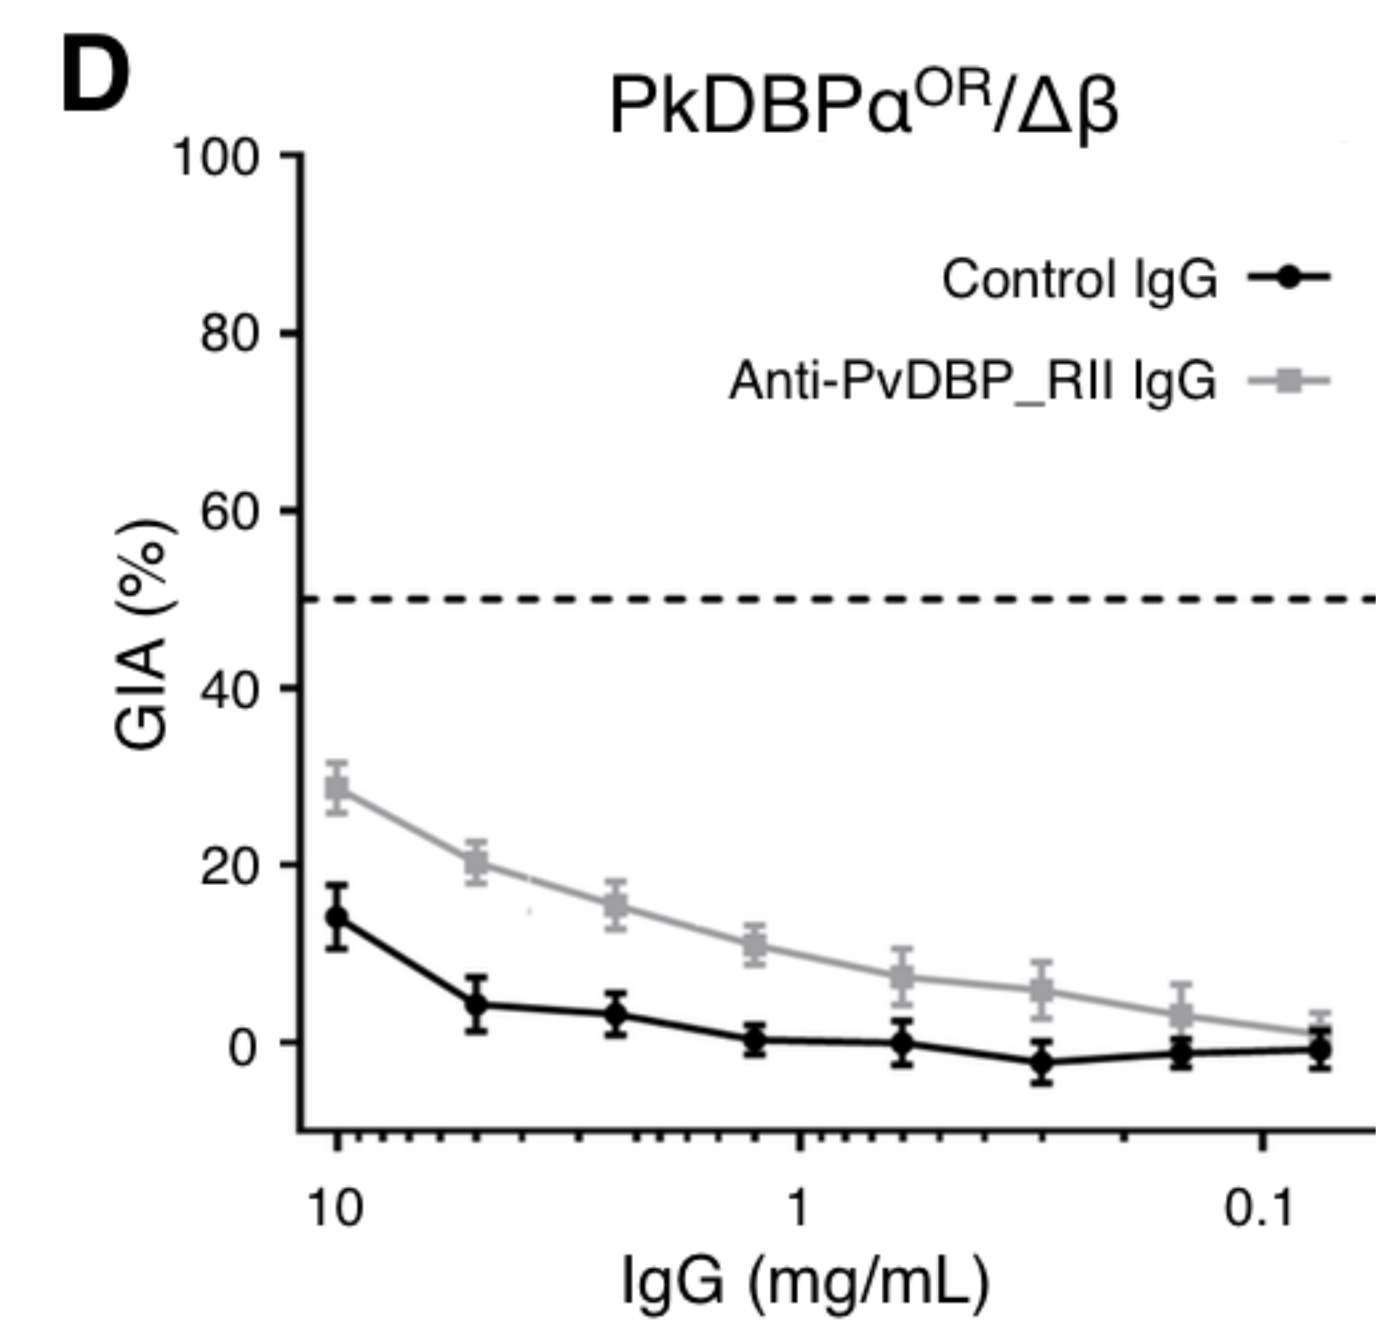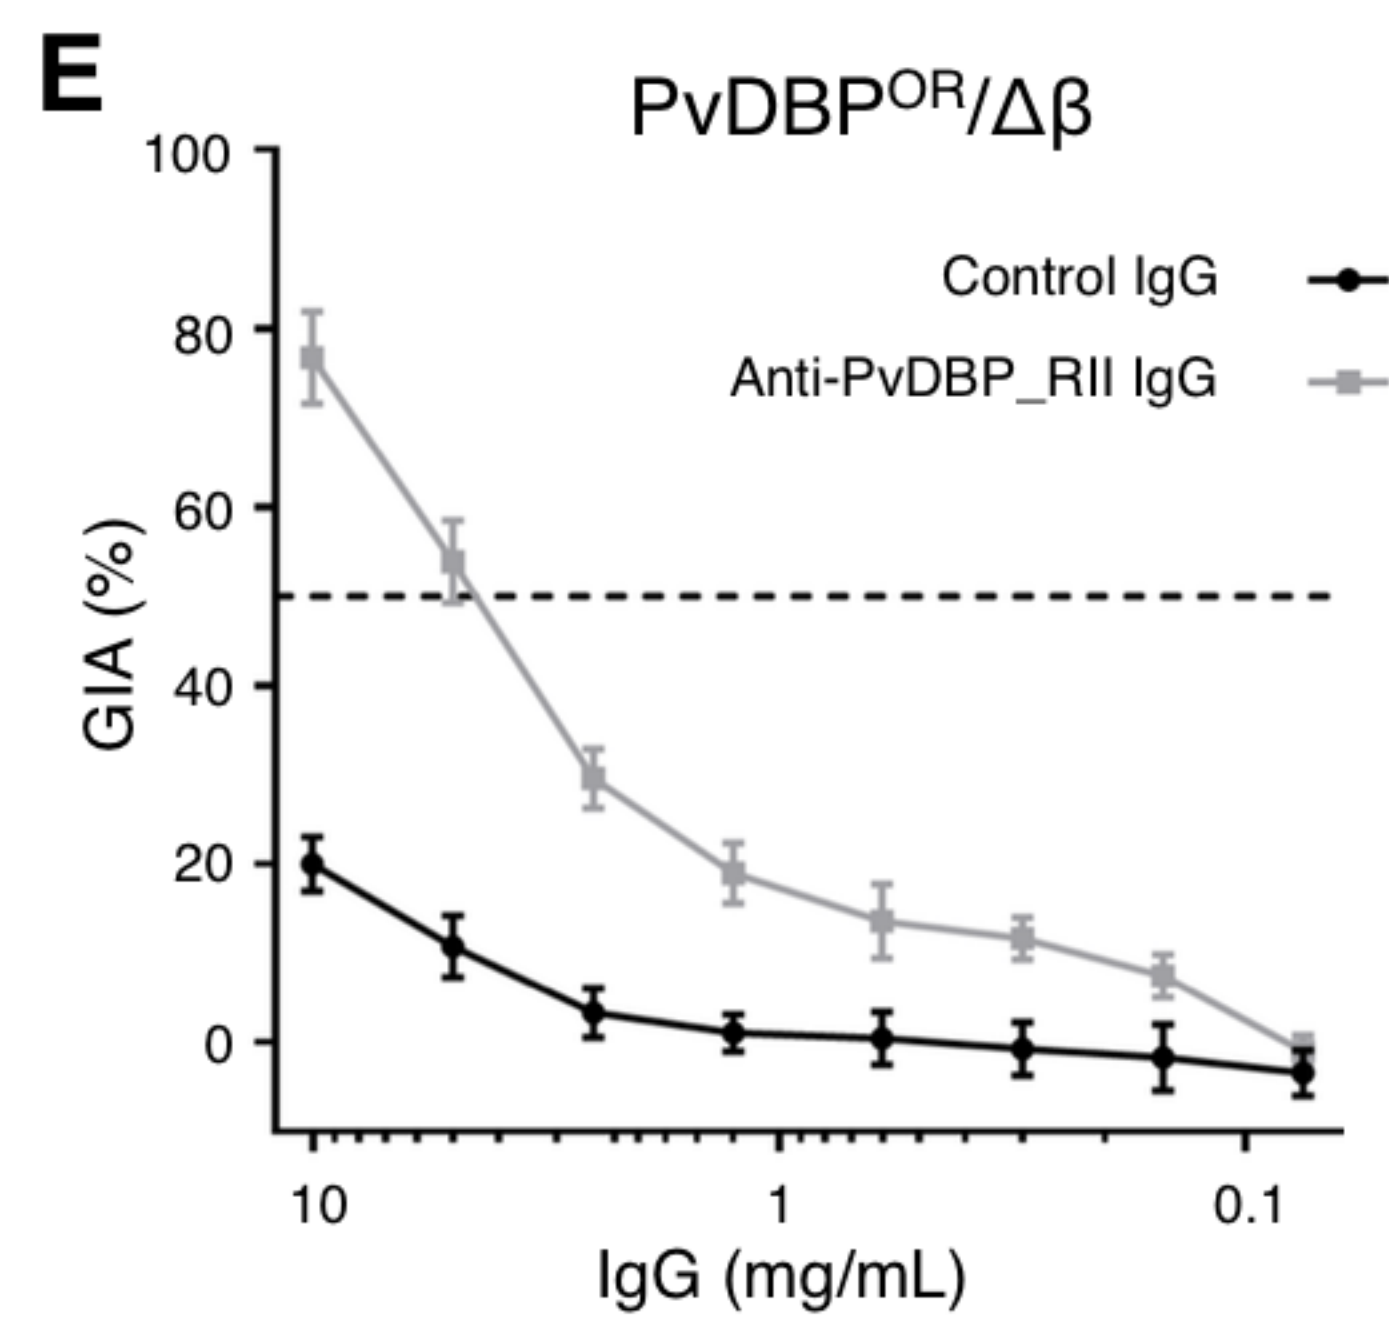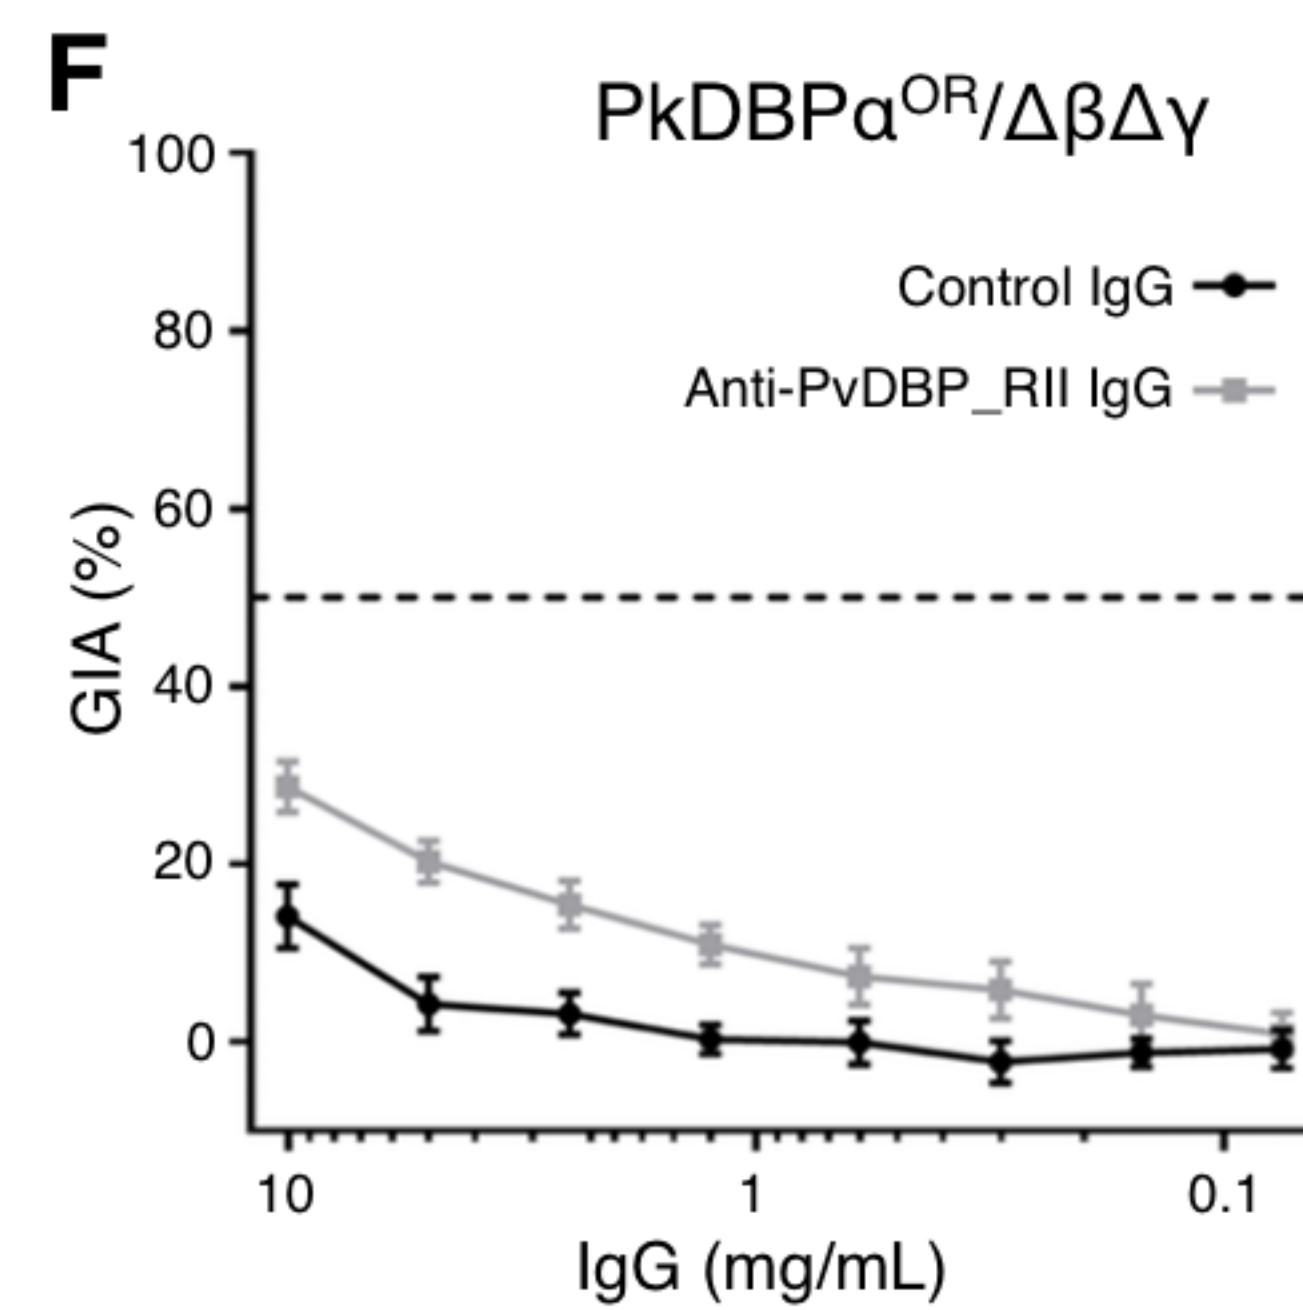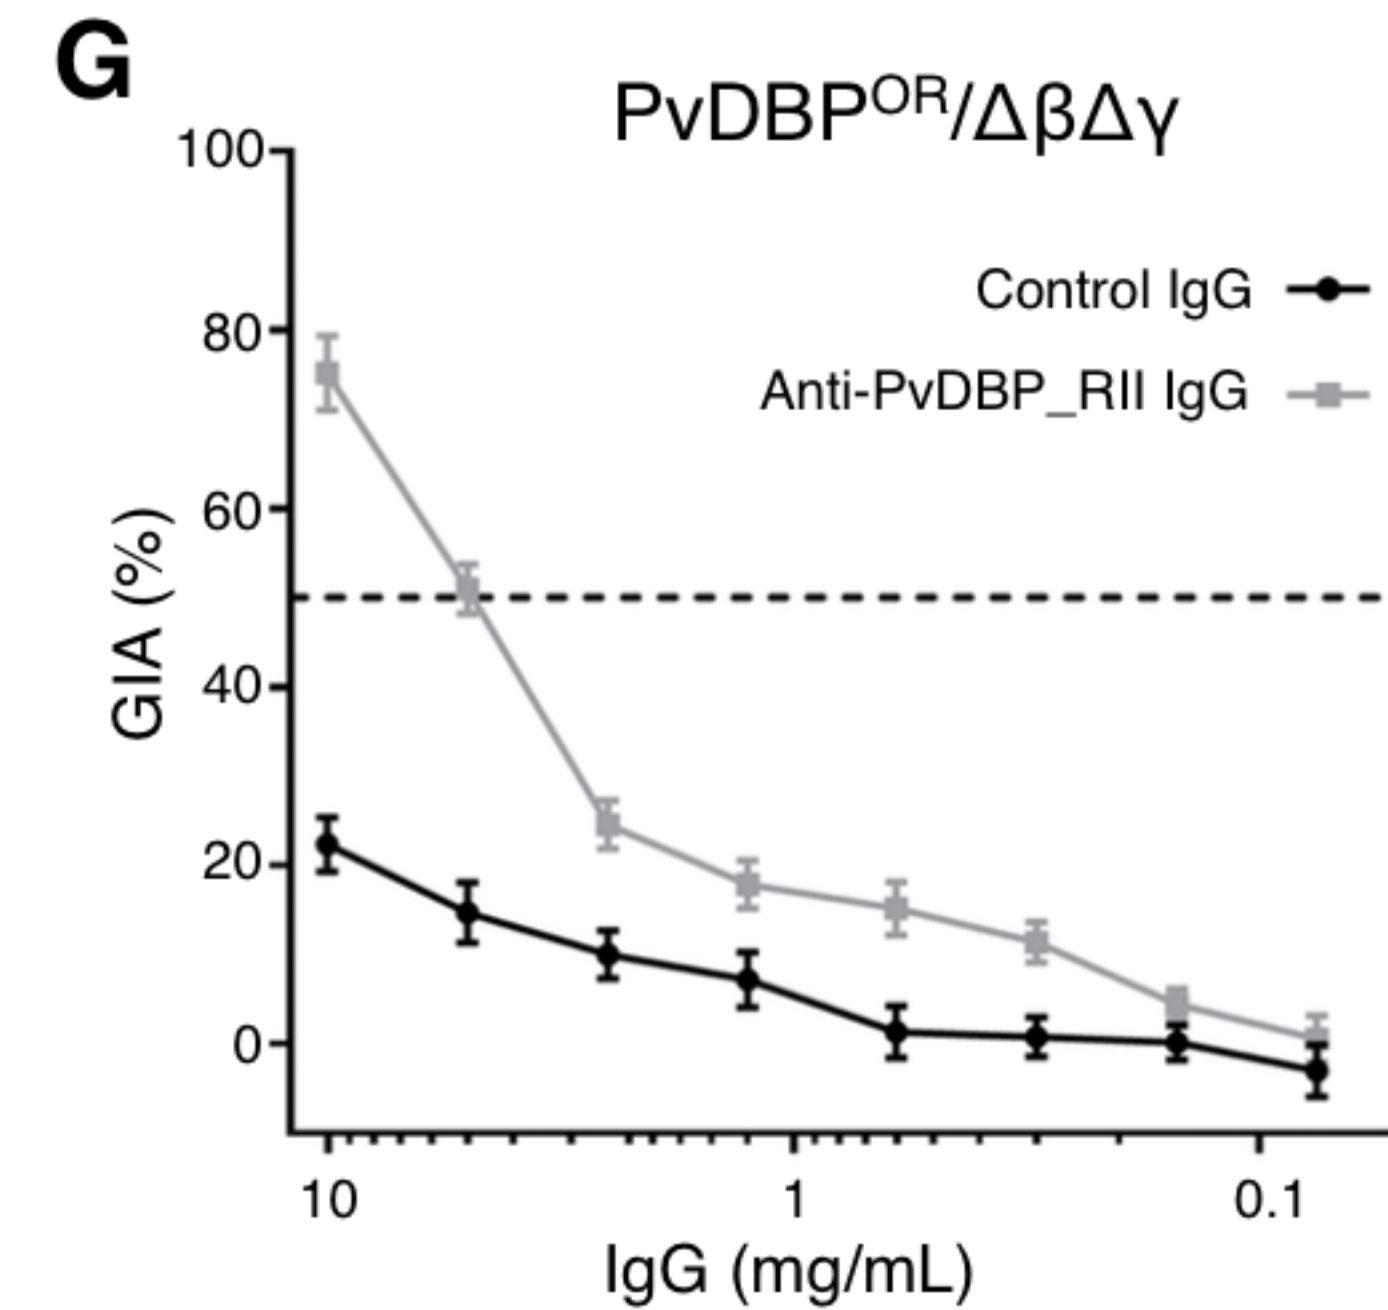

833 **Figure 4: Transgenic *P. knowlesi* orthologue replacement lines provide surrogates for *P. vivax***  
834 **vaccine development**

835 (A) The *P. knowlesi* Duffy binding protein  $\alpha$  (DBP $\alpha$ ) gene was targeted for replacement with either a  
836 recodonised PkDBP $\alpha$  or *P. vivax* DBP repair template. Sequencing revealed a loss of ~44 kb in  
837 chromosome 14, that includes loss of PkDBP $\beta$  (PkDBP $\alpha^{OR}/\Delta\beta$  and PvDBP $^{OR}/\Delta\beta$ ). These lines were  
838 then subsequently modified to knockout PkDBP $\gamma$  (PkDBP $\alpha^{OR}/\Delta\beta\Delta\gamma$  and PvDBP $^{OR}/\Delta\beta\Delta\gamma$ ). Parasite lines  
839 were analysed using PCR reactions detecting the wild type (WT) locus PkDBP $\alpha$  (ol186+ol188),  
840 orthologue replacement (OR) locus of PkDBP $\alpha^{OR}$  (ol186+ol189) or PvDBP $^{OR}$  (ol186+ol187), WT  
841 PkDBP $\beta$  locus (ol480+481), WT locus of PkDBP $\gamma$  (ol483+ol484), KO locus of PkDBP $\gamma$  (ol483+ol258)  
842 and a control PCR targeting an unrelated locus (ol75+ol76). (B) Bar chart showing mean fold  
843 replication of parasites lines in a FACS-based invasion assays over one growth cycle (24 h). Assays  
844 were carried out in eight independent experiments for human blood (hRBC) and three independent  
845 experiments for *Macaca fascicularis* blood (mRBC). Error bars indicate  $\pm 1$  SD. Data points represent  
846 the mean single cycle growth rate. Replication rates of the parasites lines were compared by using  
847 unpaired t-tests comparing means. There are significant differences in fold multiplication rates of  
848 PkDBP $\alpha^{OR}/\Delta\beta$  against PvDBP $^{OR}/\Delta\beta$  in mRBCs ( $p < 0.05$ ), and PkDBP $\alpha^{OR}/\Delta\beta\Delta\gamma$  against PvDBP $^{OR}/\Delta\beta\Delta\gamma$   
849 in hRBCs ( $p < 0.05$ ) and mRBCs ( $p < 0.05$ ). (C) Graph showing growth inhibition activity (GIA, %) of  
850 anti-DARC nanobody at 1.5 and 3  $\mu\text{g/ml}$  and anti-MSP1 $_{19}$  purified total rabbit IgG at 2.5 and 5  $\text{mg/ml}$   
851 on the parasite lines. Data points represent the mean and error bars indicated  $\pm 1$  SD of triplicate test  
852 wells ( $n=3$ ). (D-G) Graphs showing % GIA of anti-PvDBP-RII IgG purified from rabbit serum against  
853 transgenic *P. knowlesi* lines. Each panel shows the % GIA of a dilution series of total IgG purified from  
854 sera of PvDBP\_RII (SalI)-immunized rabbits as well as control IgG from the pre-immunisation sera of  
855 the same rabbits on (D) PkDBP $\alpha^{OR}/\Delta\beta$  (E) PvDBP $^{OR}/\Delta\beta$ , (F) PkDBP $\alpha^{OR}/\Delta\beta\Delta\gamma$  line, (G) PvDBP $^{OR}/$   
856  $\Delta\beta\Delta\gamma$  line. Data points represent the mean and error bars indicate  $\pm 1$  SD of 6 replicates.

857

**A**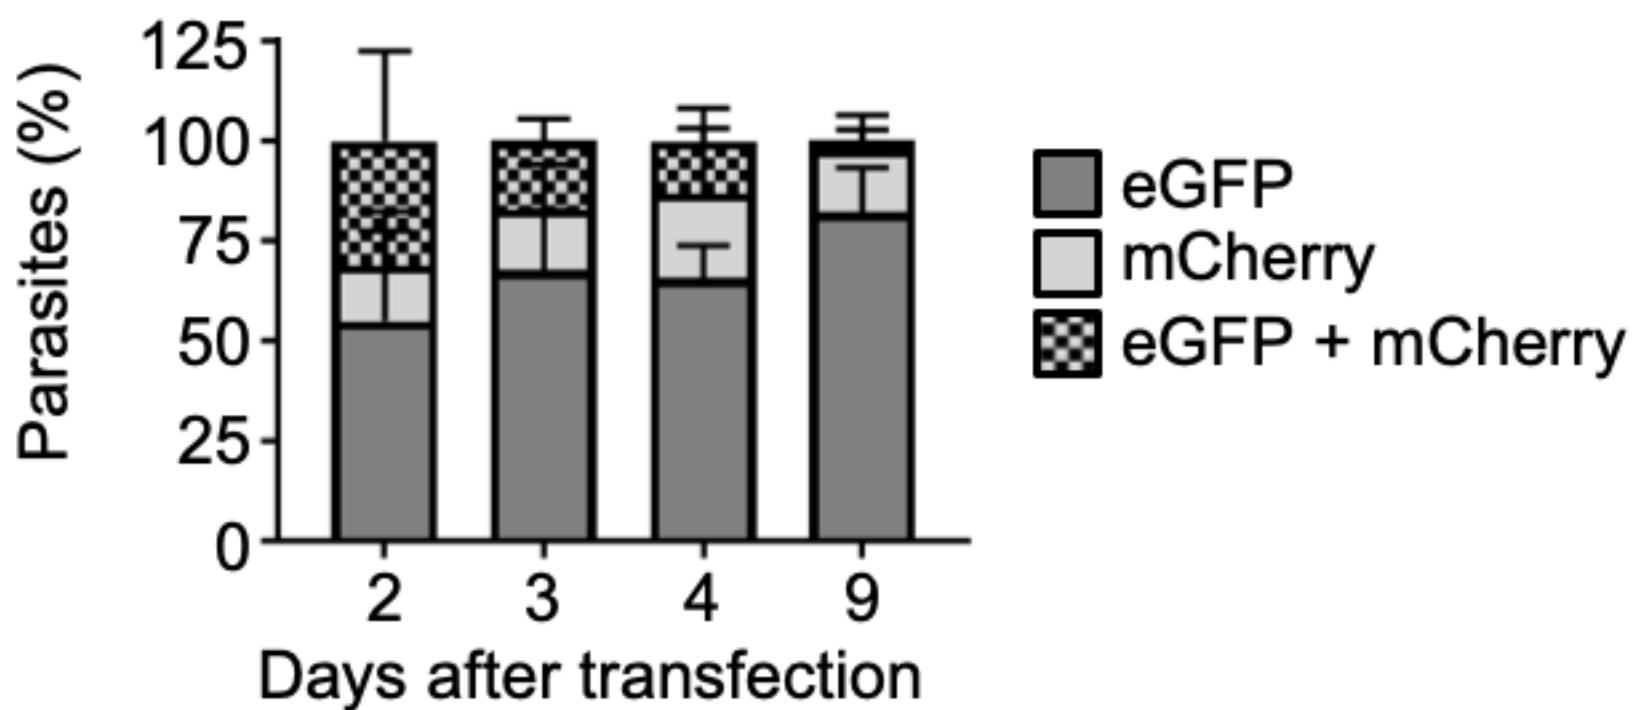**B**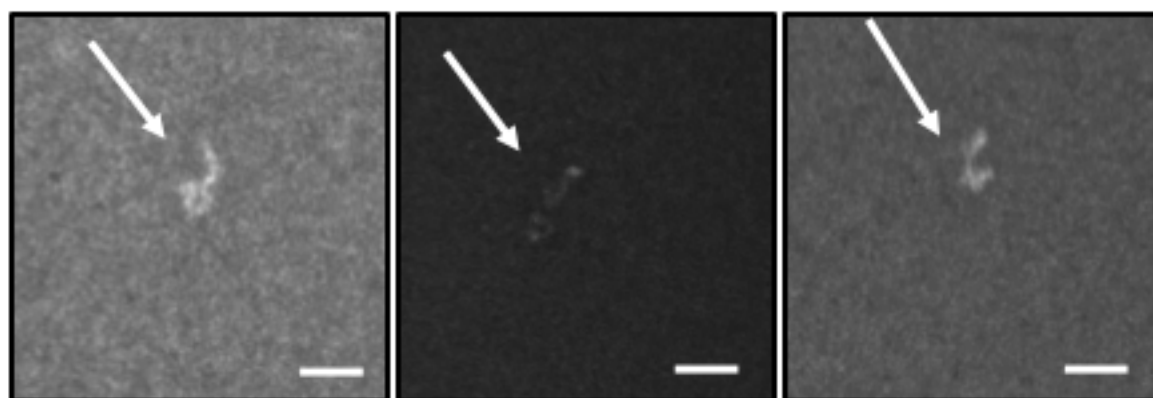

858 **Supplemental Figure legends**

859 **Figure S1: *P. knowlesi* dual plasmid uptake and plaque assay**

860 (A) *P. knowlesi* parasites were co-transfected with 20 µg of plasmid containing an eGFP expression  
861 cassette (PkconGFP) and 20 µg of plasmid containing an mCherry expression cassette (PkconmCherry)  
862 and the proportion of parasites expressing each fluorescent protein monitored on consecutive days after  
863 transfection. Graph shows mean proportion of parasites expressing eGFP, mCherry or both across three  
864 independent experiments. Error bars denote  $\pm 1$  SD. (B) *P. knowlesi* parasites modified using CRISPR  
865 Cas9 were cloned by limiting dilution in 96 well plates. Infected wells were identified by scanning for  
866 parasite “plaques” 10 days after initiating cloning plates. Images show three representative images of  
867 parasite plaques visualised using 4X objective of an inverted microscope. Scale bars indicate 200 µm.

868



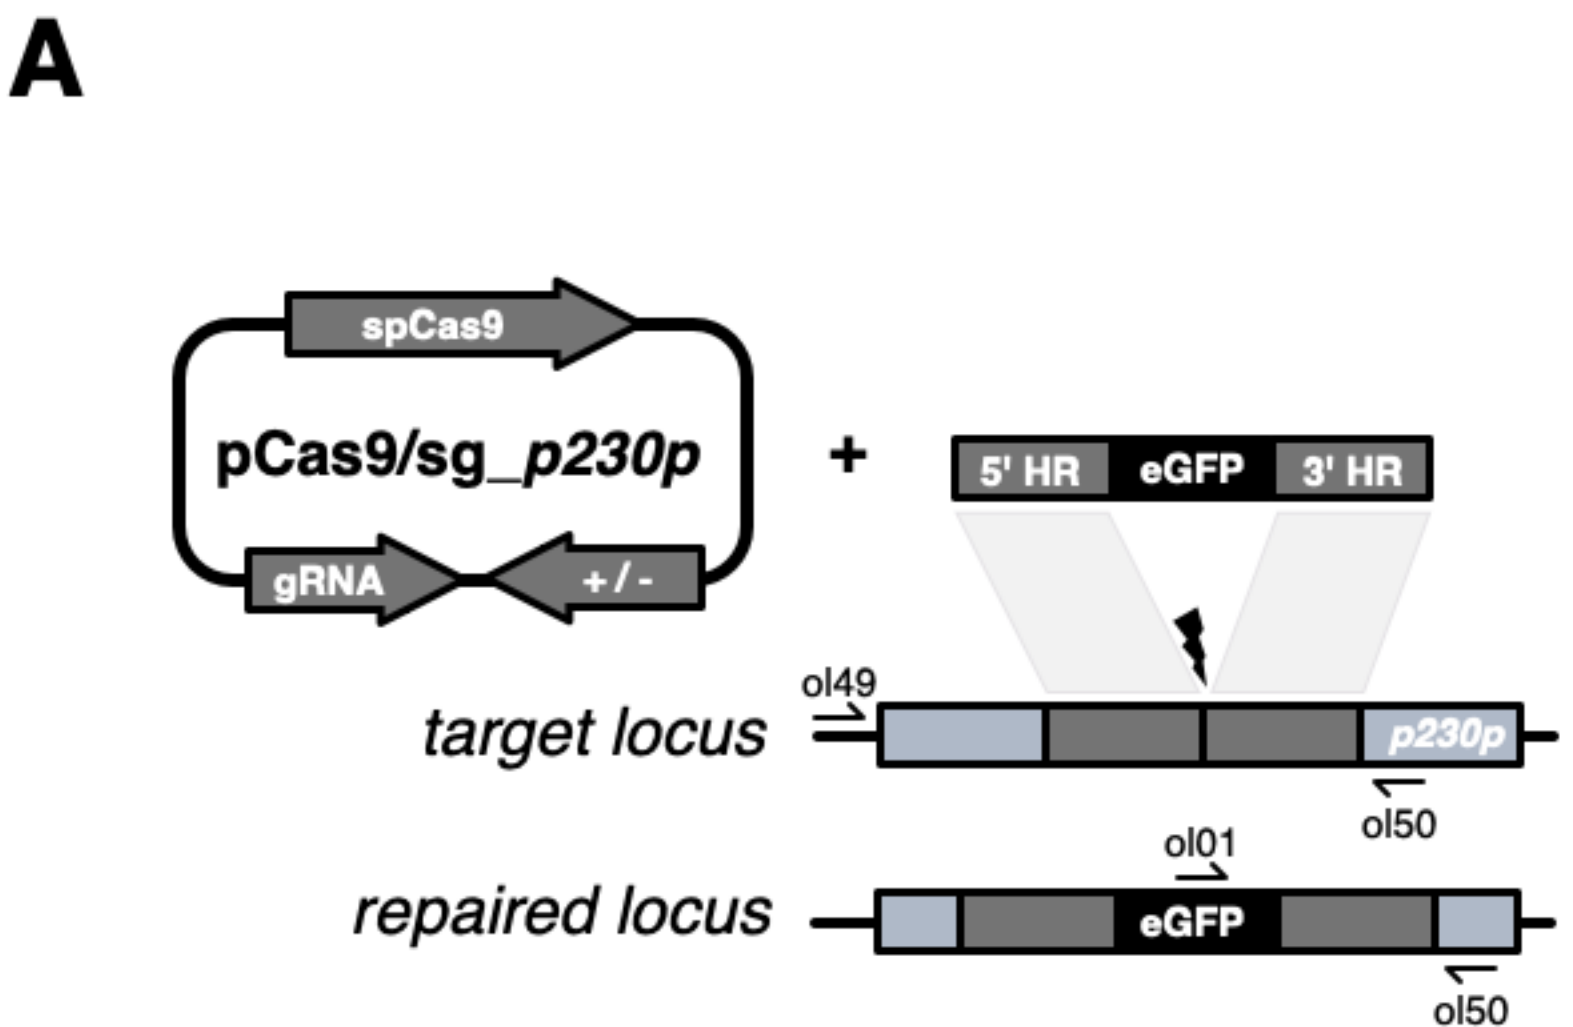

bioRxiv preprint doi: <https://doi.org/10.1101/590976>; this version posted March 28, 2019. The copyright holder for this preprint (which was not certified by peer review) is the author/funder, who has granted bioRxiv a license to display the preprint in perpetuity. It is made available under aCC-BY 4.0 International license.

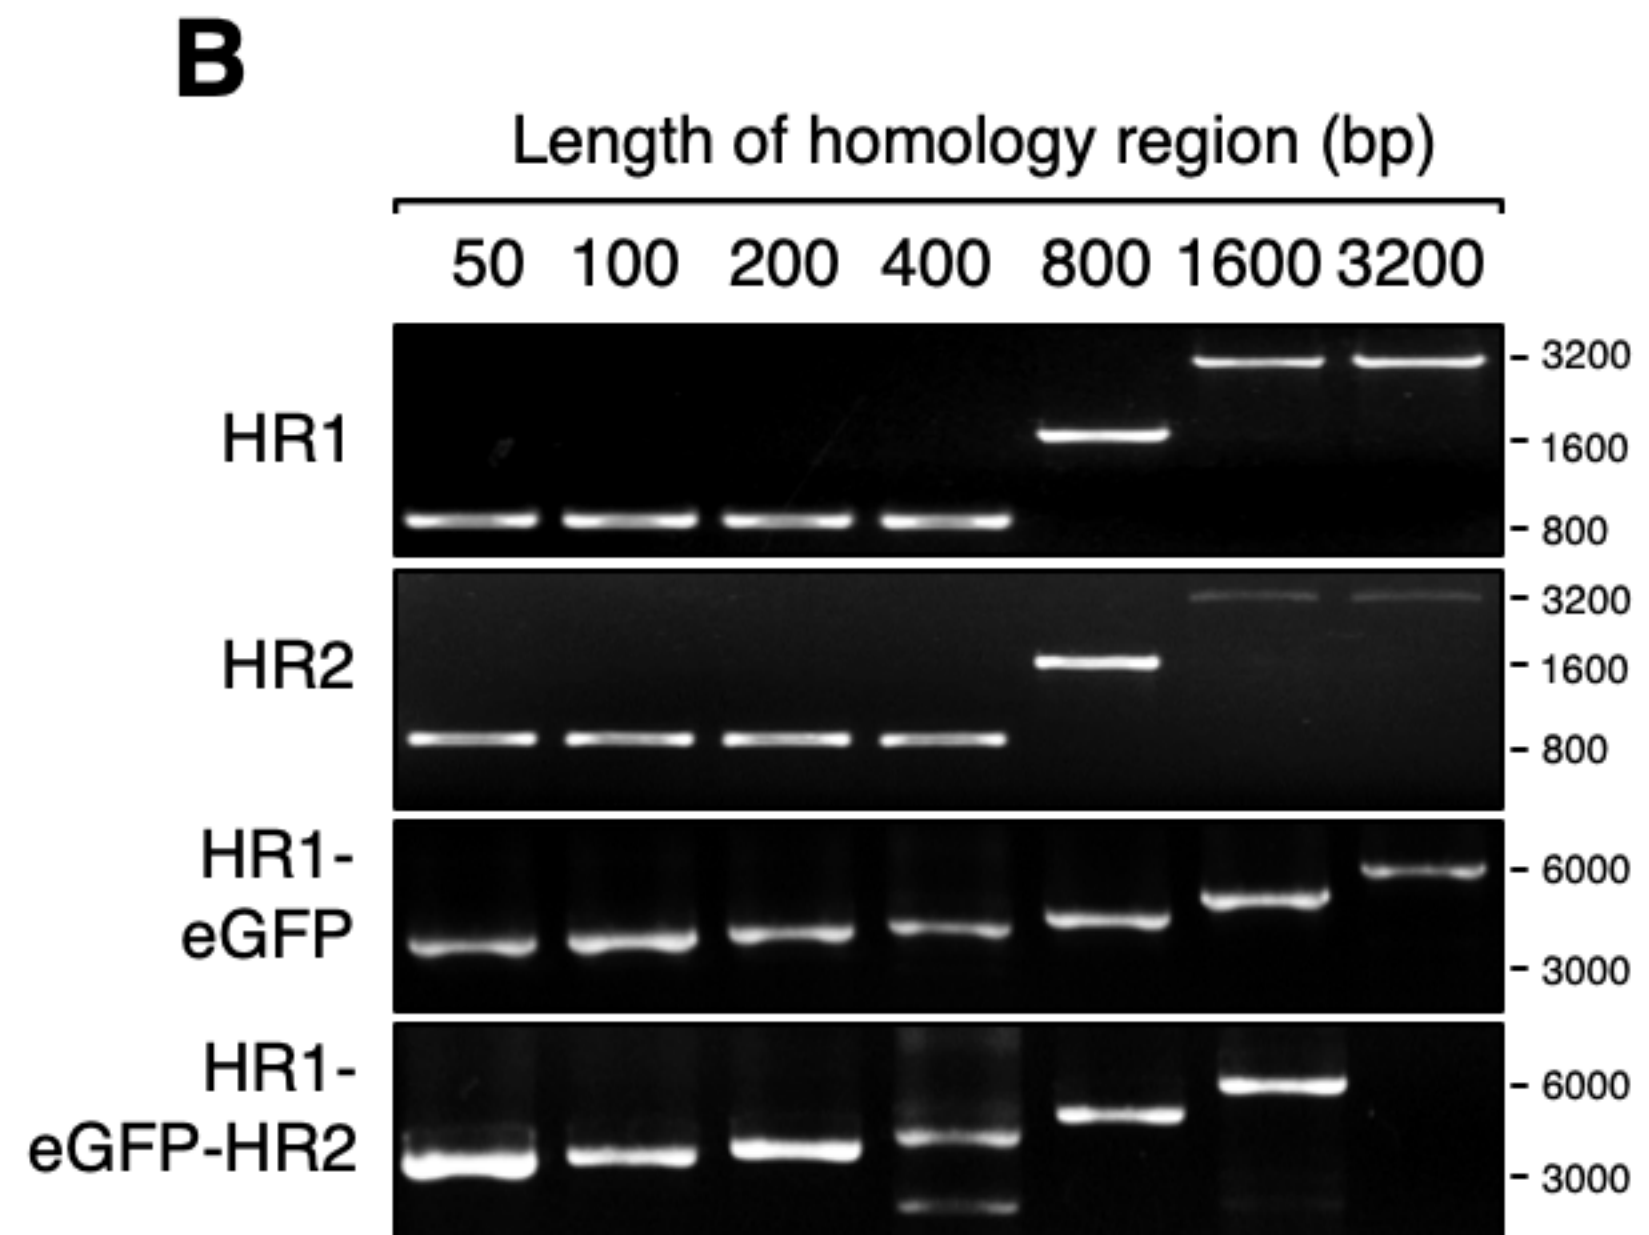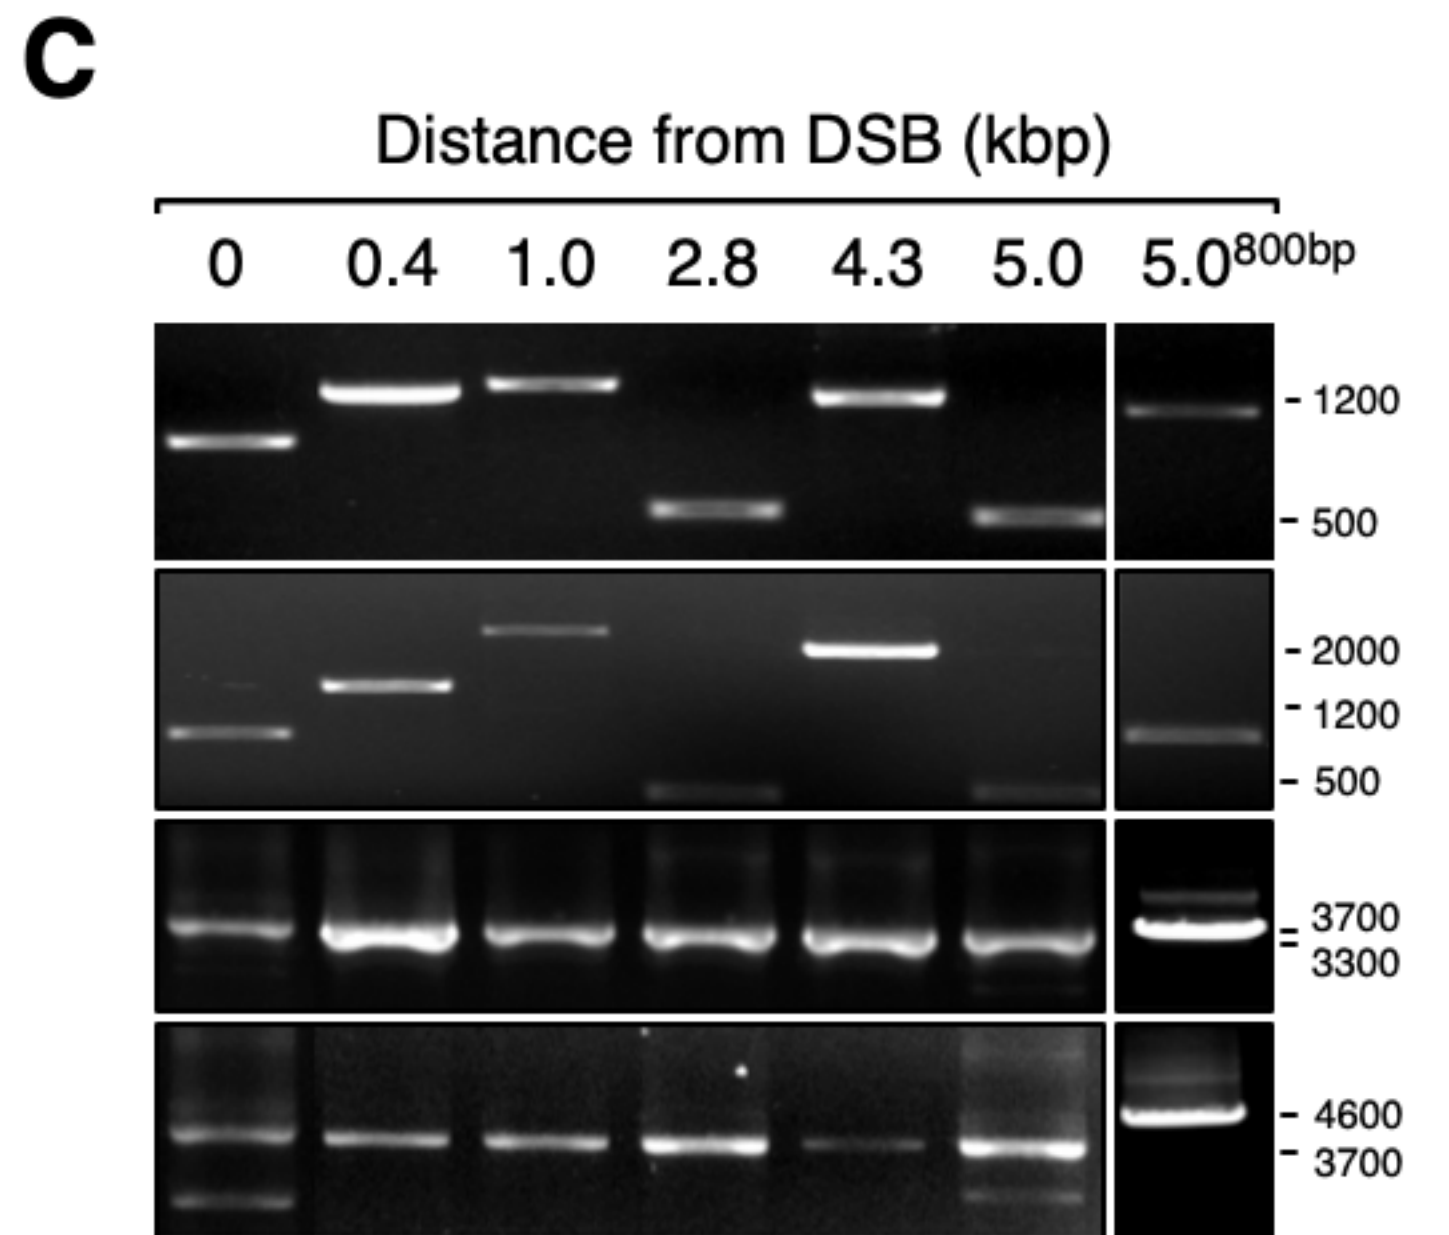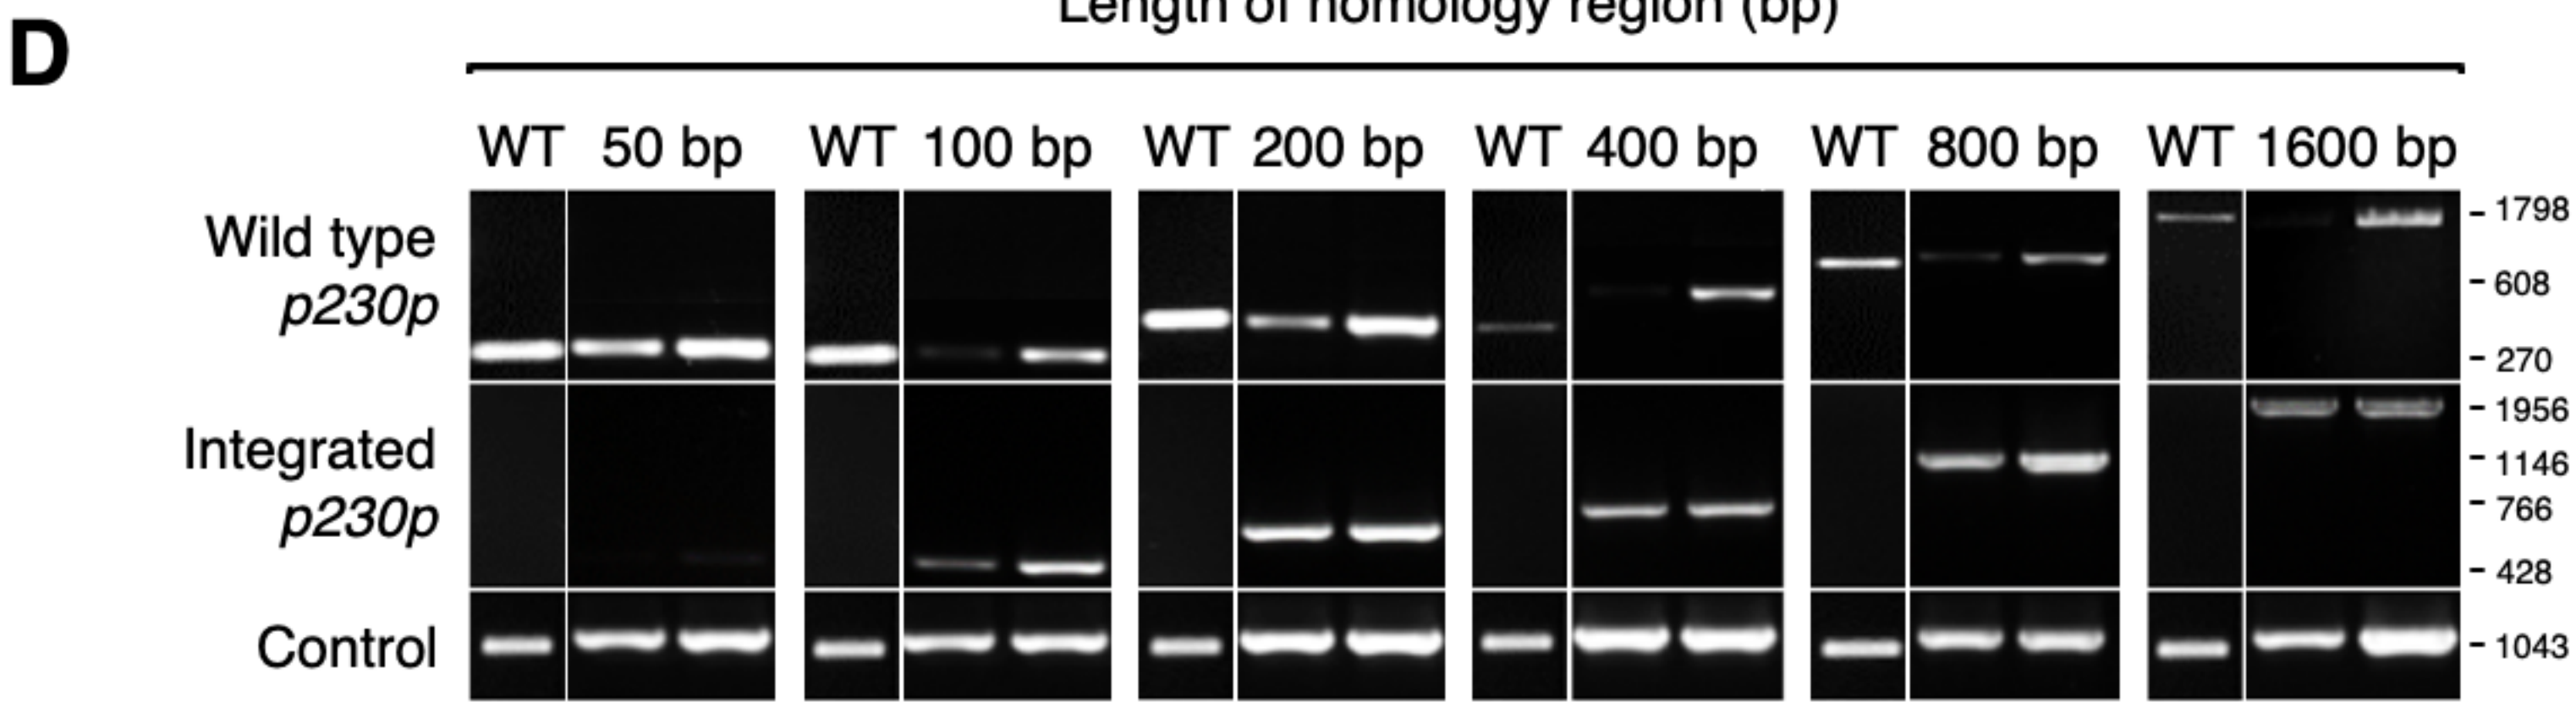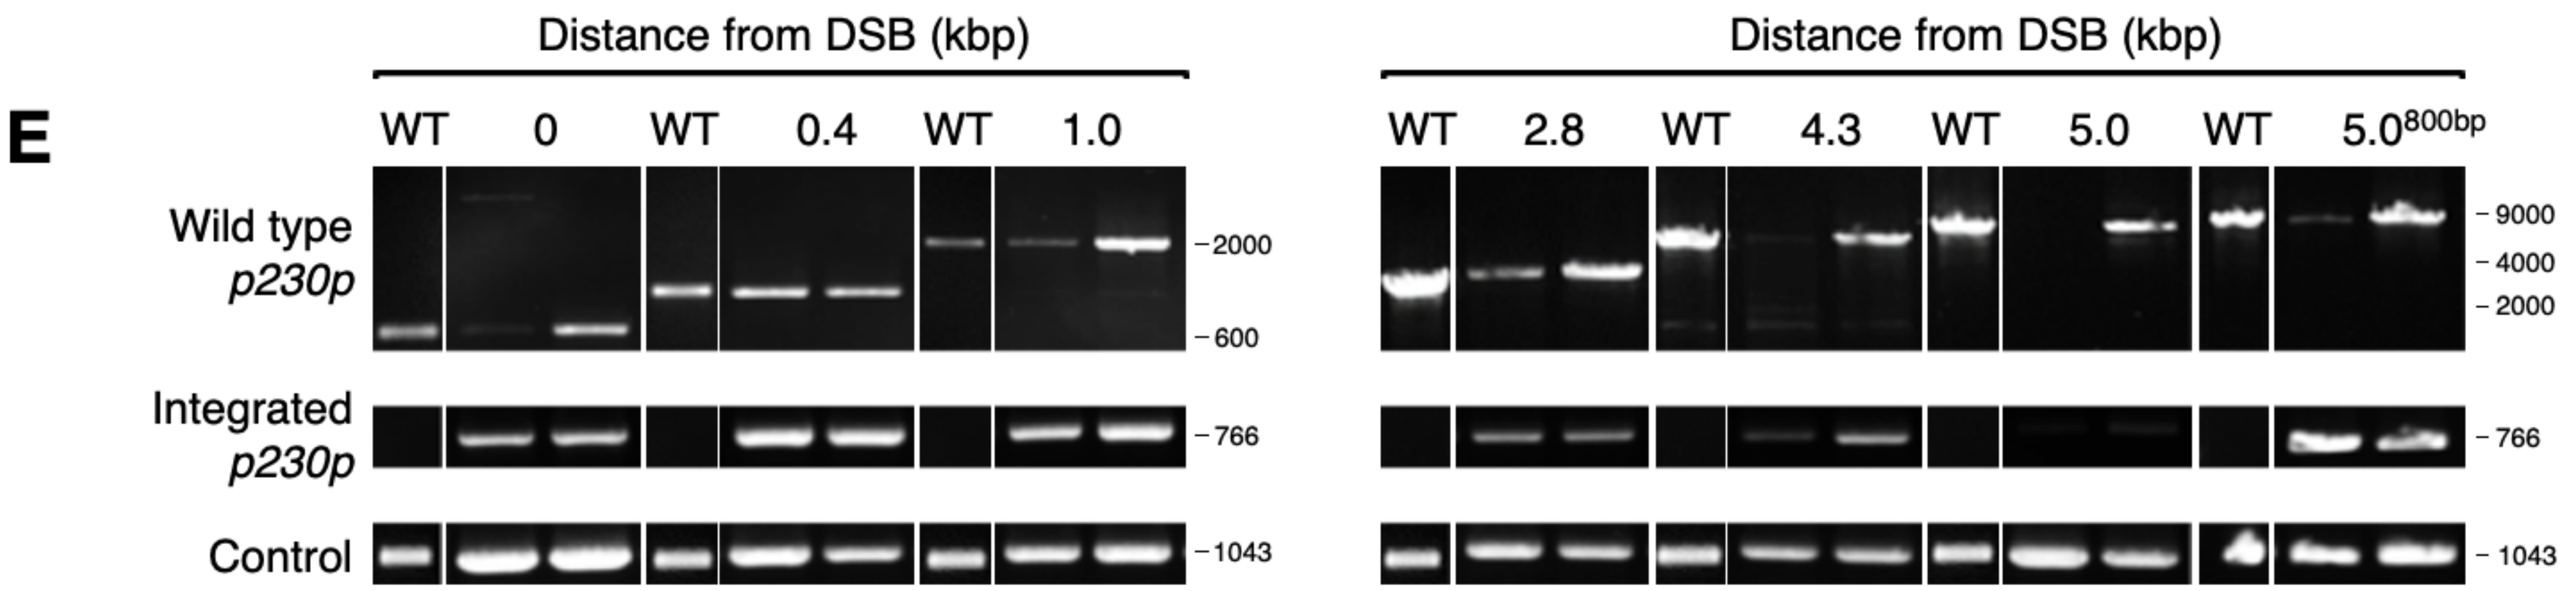

869 **Figure S2: Schematic and genotypic analysis of fusion PCR repair template integration into**

870 ***p230p* locus**

871 (A) Schematic of CRISPR-Cas9 strategy. Integration of the eGFP expression cassette into the target  
872 *p230p* locus via homologous recombination using PCR repair template. Arrows indicating oligo  
873 positions for diagnostic PCRs. (B) Three-step nested PCR products to generate CRISPR-Cas9 repair  
874 templates. In the first step Homology region 1 (HR1) and HR2 are generated individually with eGFP  
875 cassette adaptors. Varying band sizes (e.g. for 50 to 400 bp HRs the same 800 bp product was  
876 generated) reflect different length of overhangs to allow a subsequent nested PCR step. In the second  
877 step HR1 and eGFP cassette are fused followed by the third and final step of fusing HR2 to the previous  
878 generated HR1-eGFP product. (C) Parasites transfected with pCas9/sg\_ *p230p* and PCR repair templates  
879 with HRs ranging from 50 to 1600 bp were analysed with diagnostic PCRs. PCRs of two transfections  
880 are shown. PCR reactions detecting the wild type locus, integration locus and a control PCR targeting  
881 an unrelated locus (ol75+ol76) using approximately 3 ng/μl genomic DNA for each reaction. (D)  
882 Parasites transfected with pCas9/sg\_ *p230p* and PCR repair templates with HRs of 400 bp or 800 bp of  
883 varying distances to the DSB were analysed with diagnostic PCRs. PCRs of two transfections are  
884 shown. PCR reactions detecting the wild type locus, integration locus and a control PCR targeting an  
885 unrelated locus (ol75+ol76) using approximately 3 ng/μl genomic DNA. Primers are listed in Table S4.  
886  
887



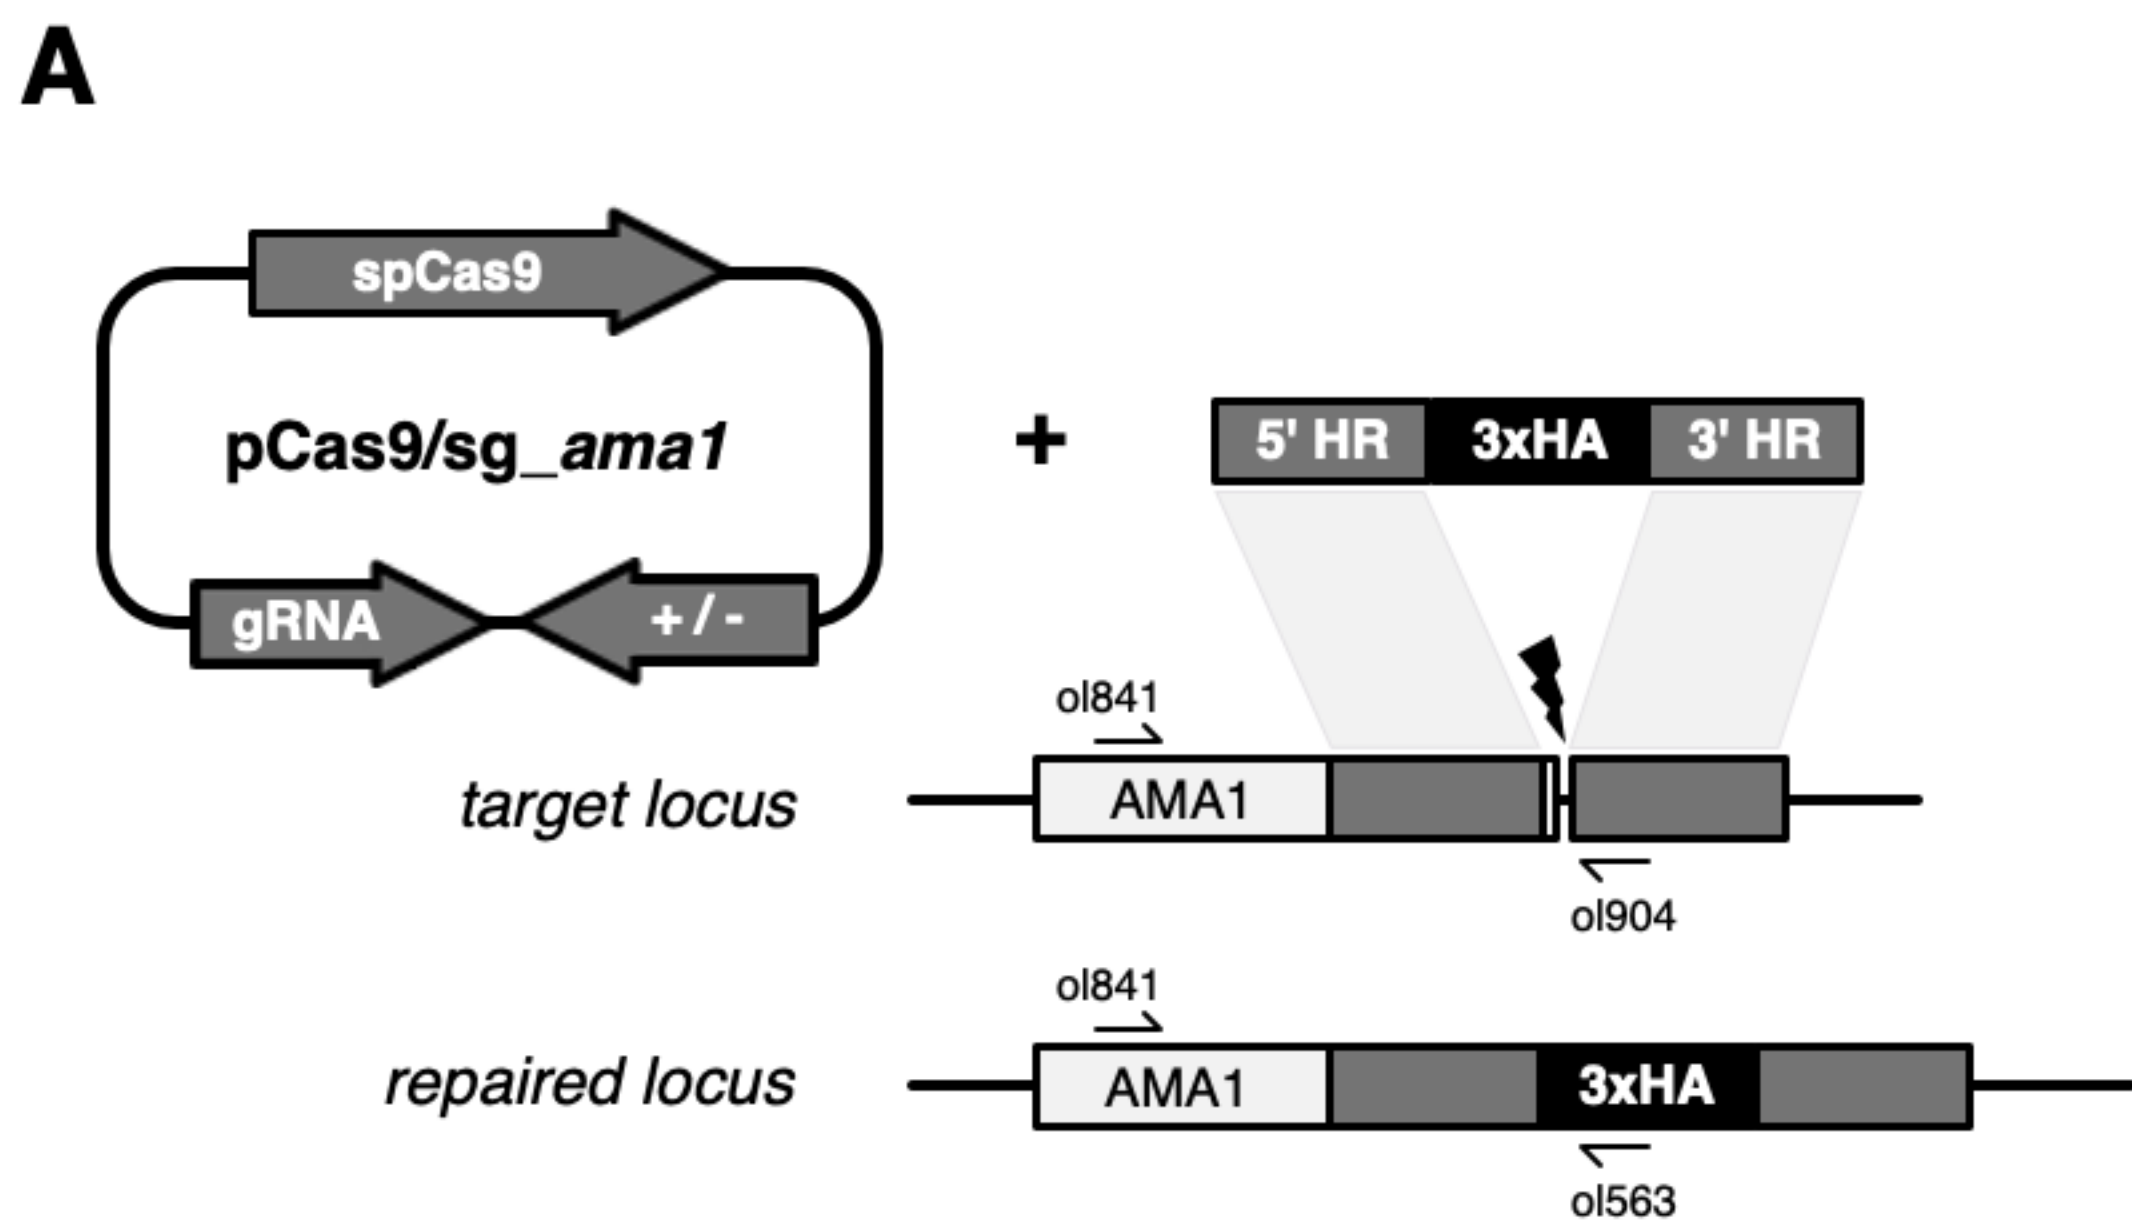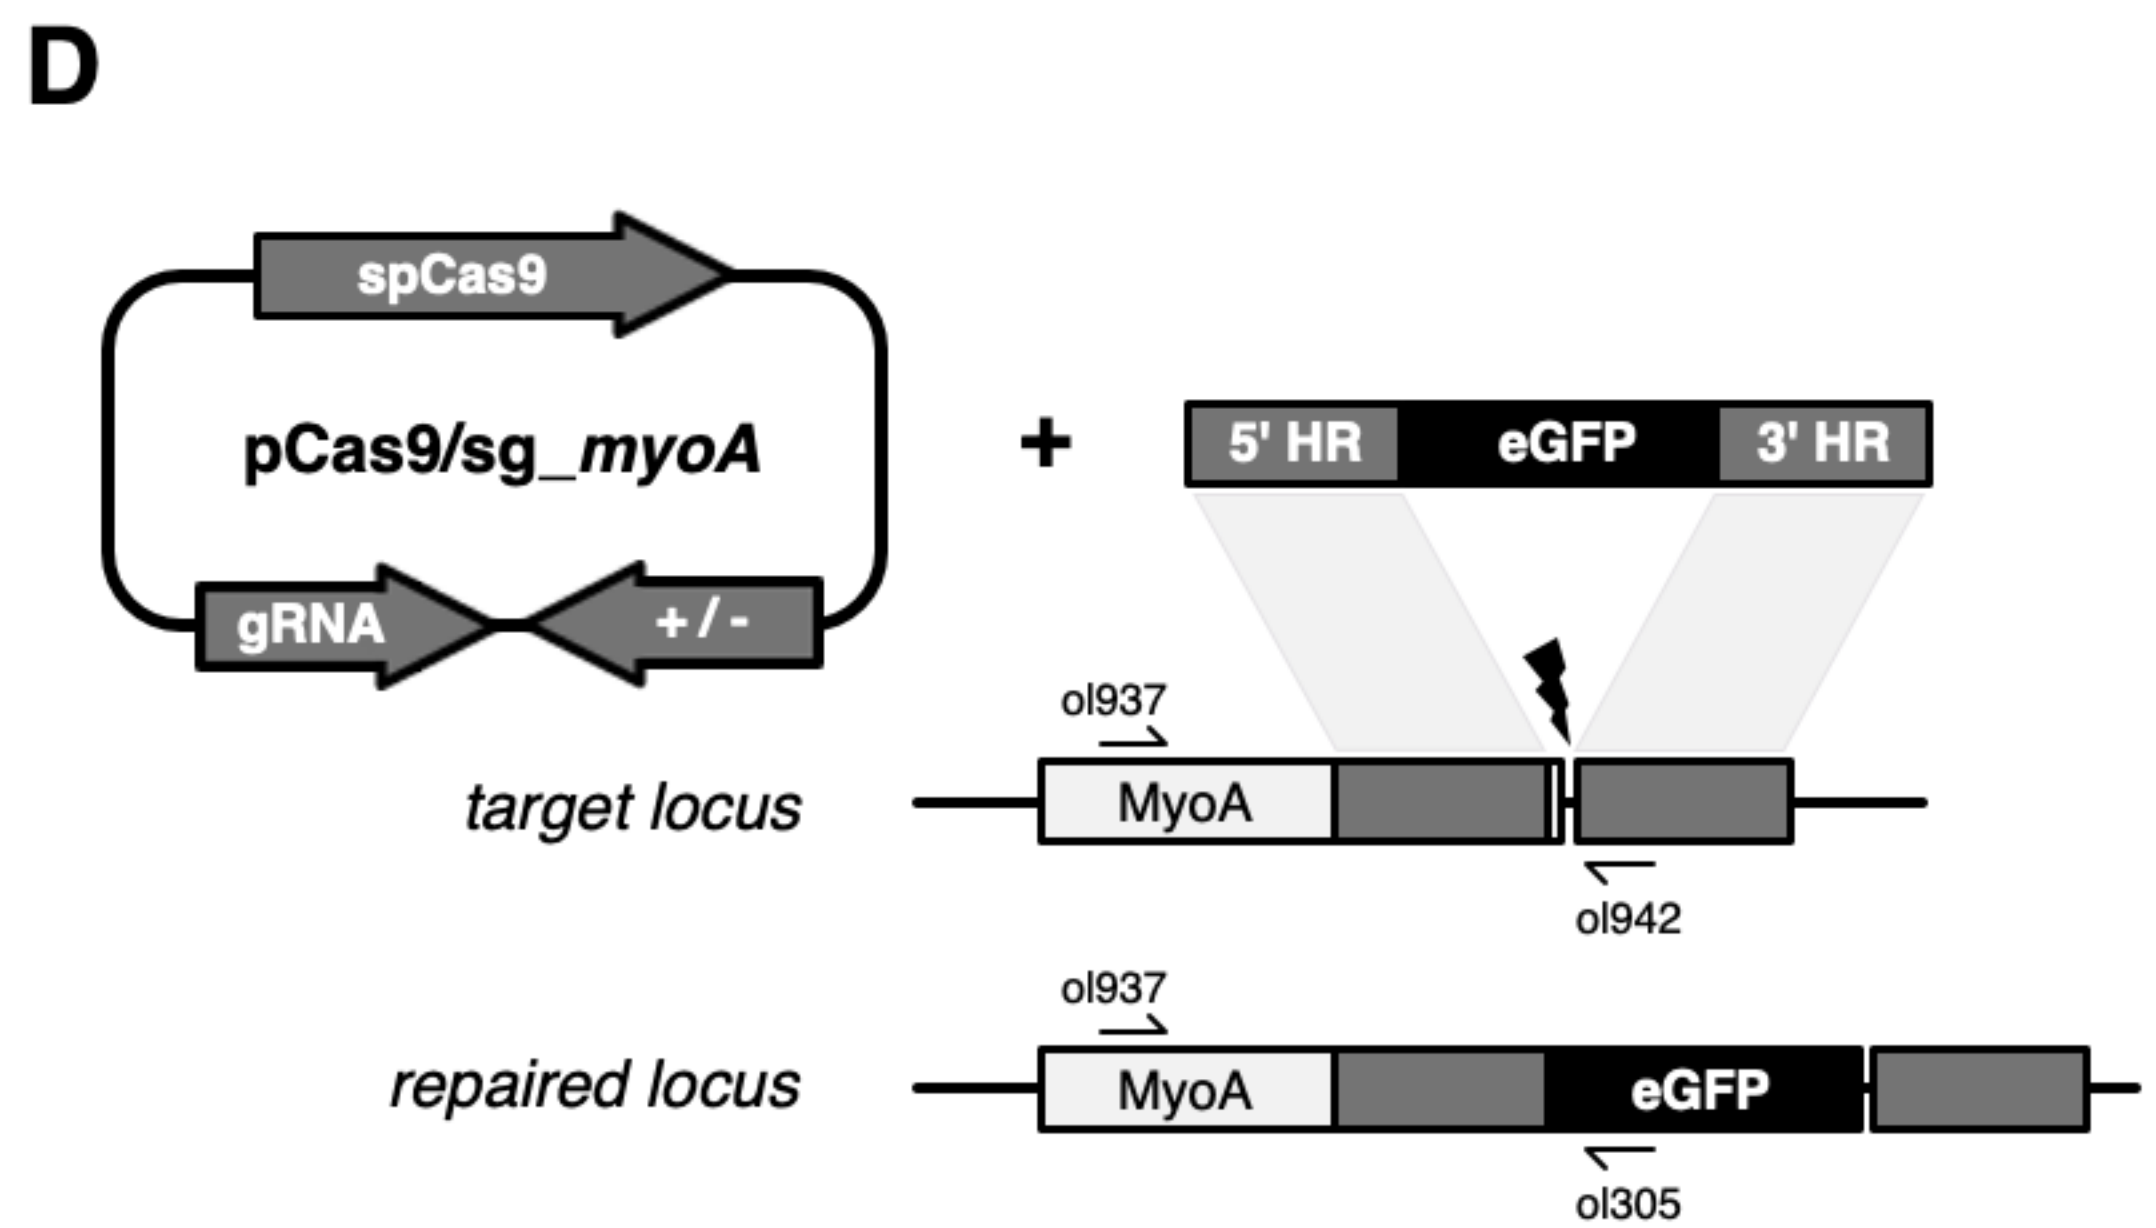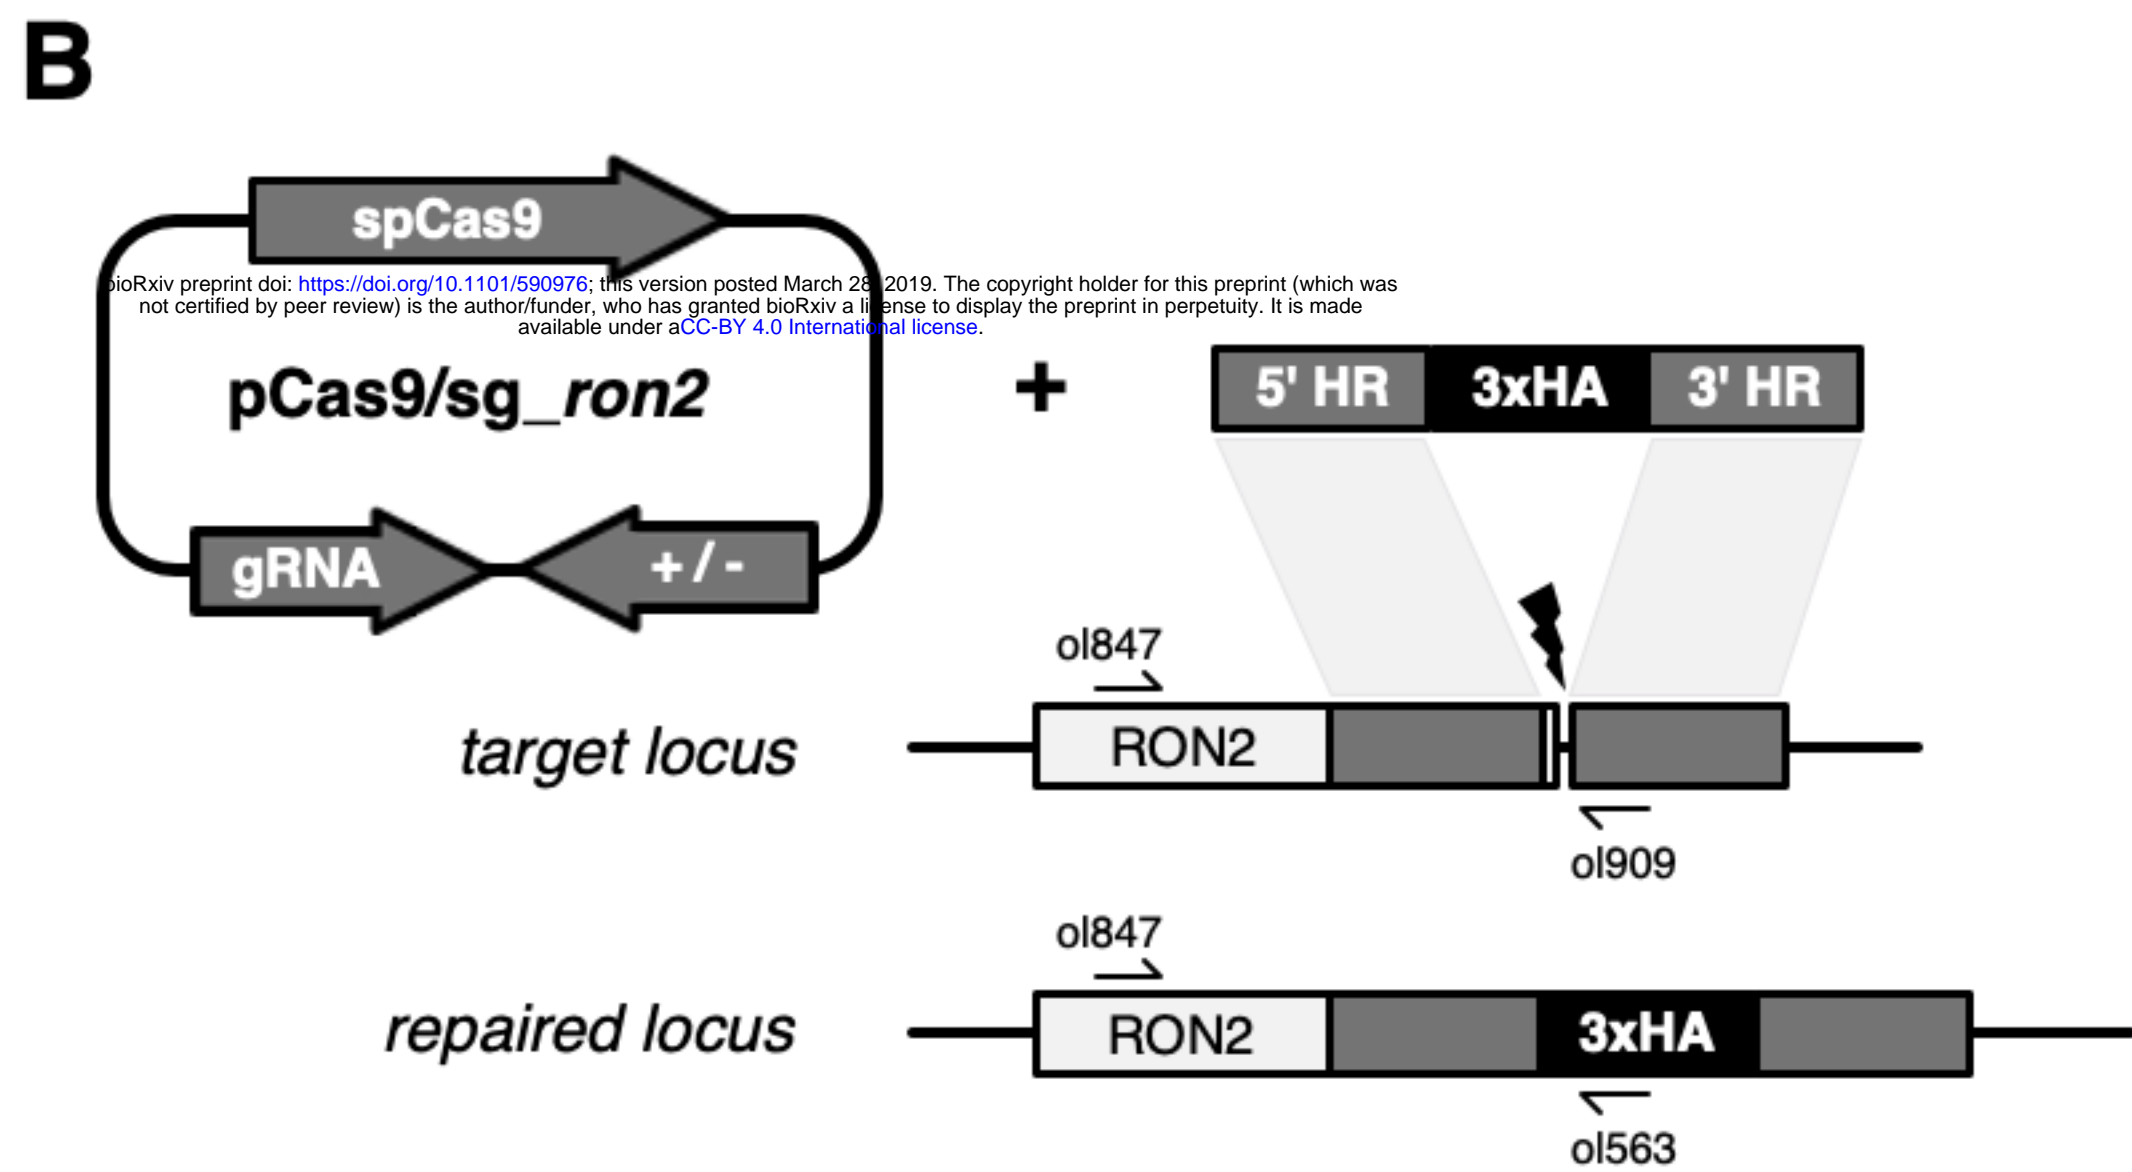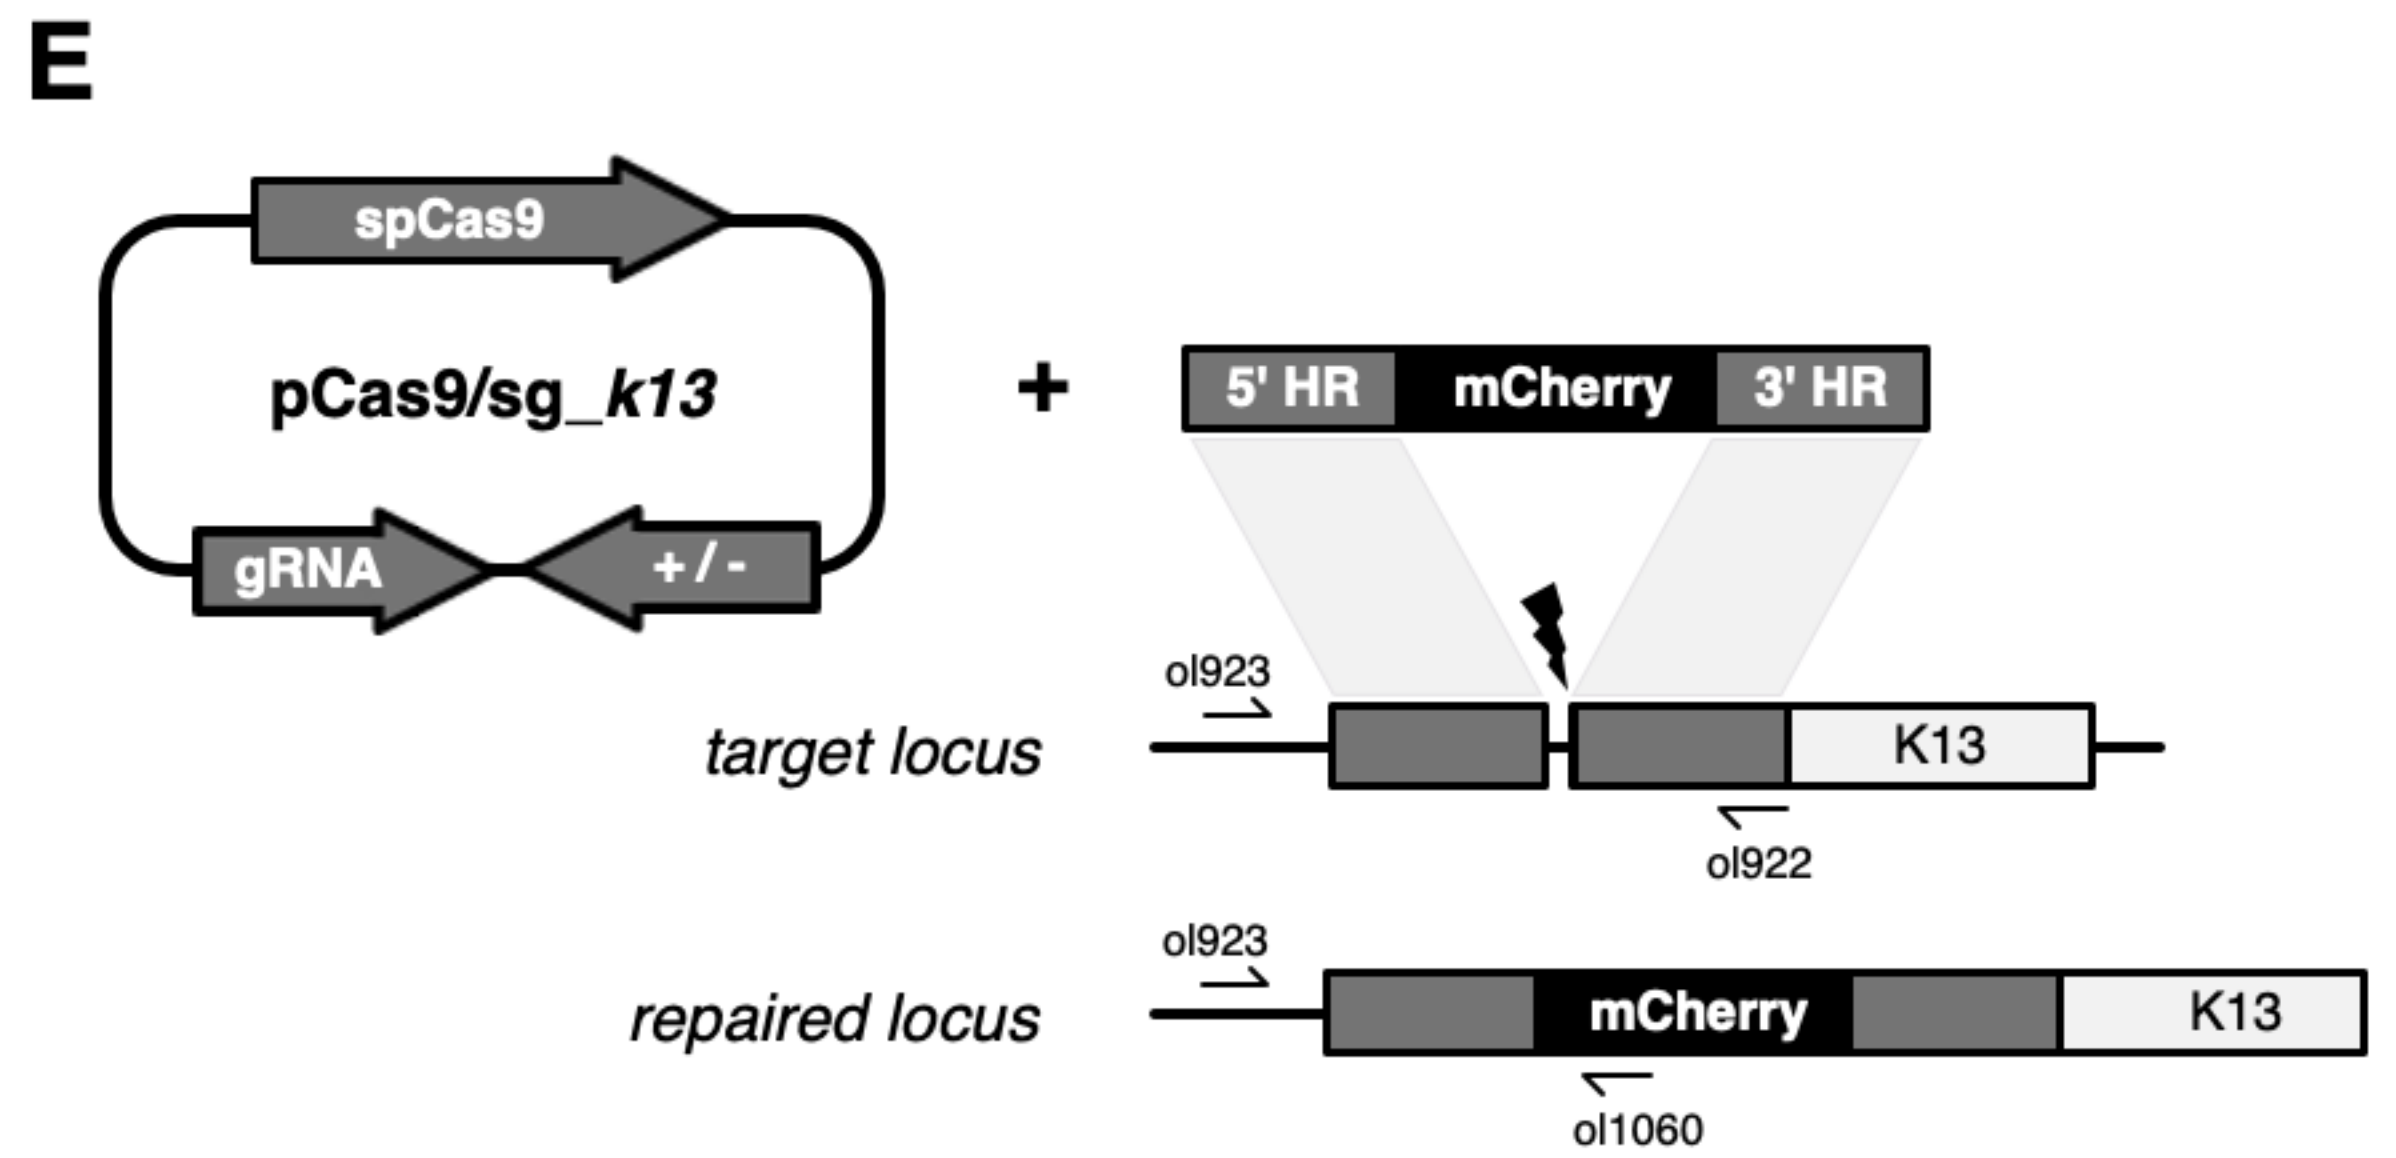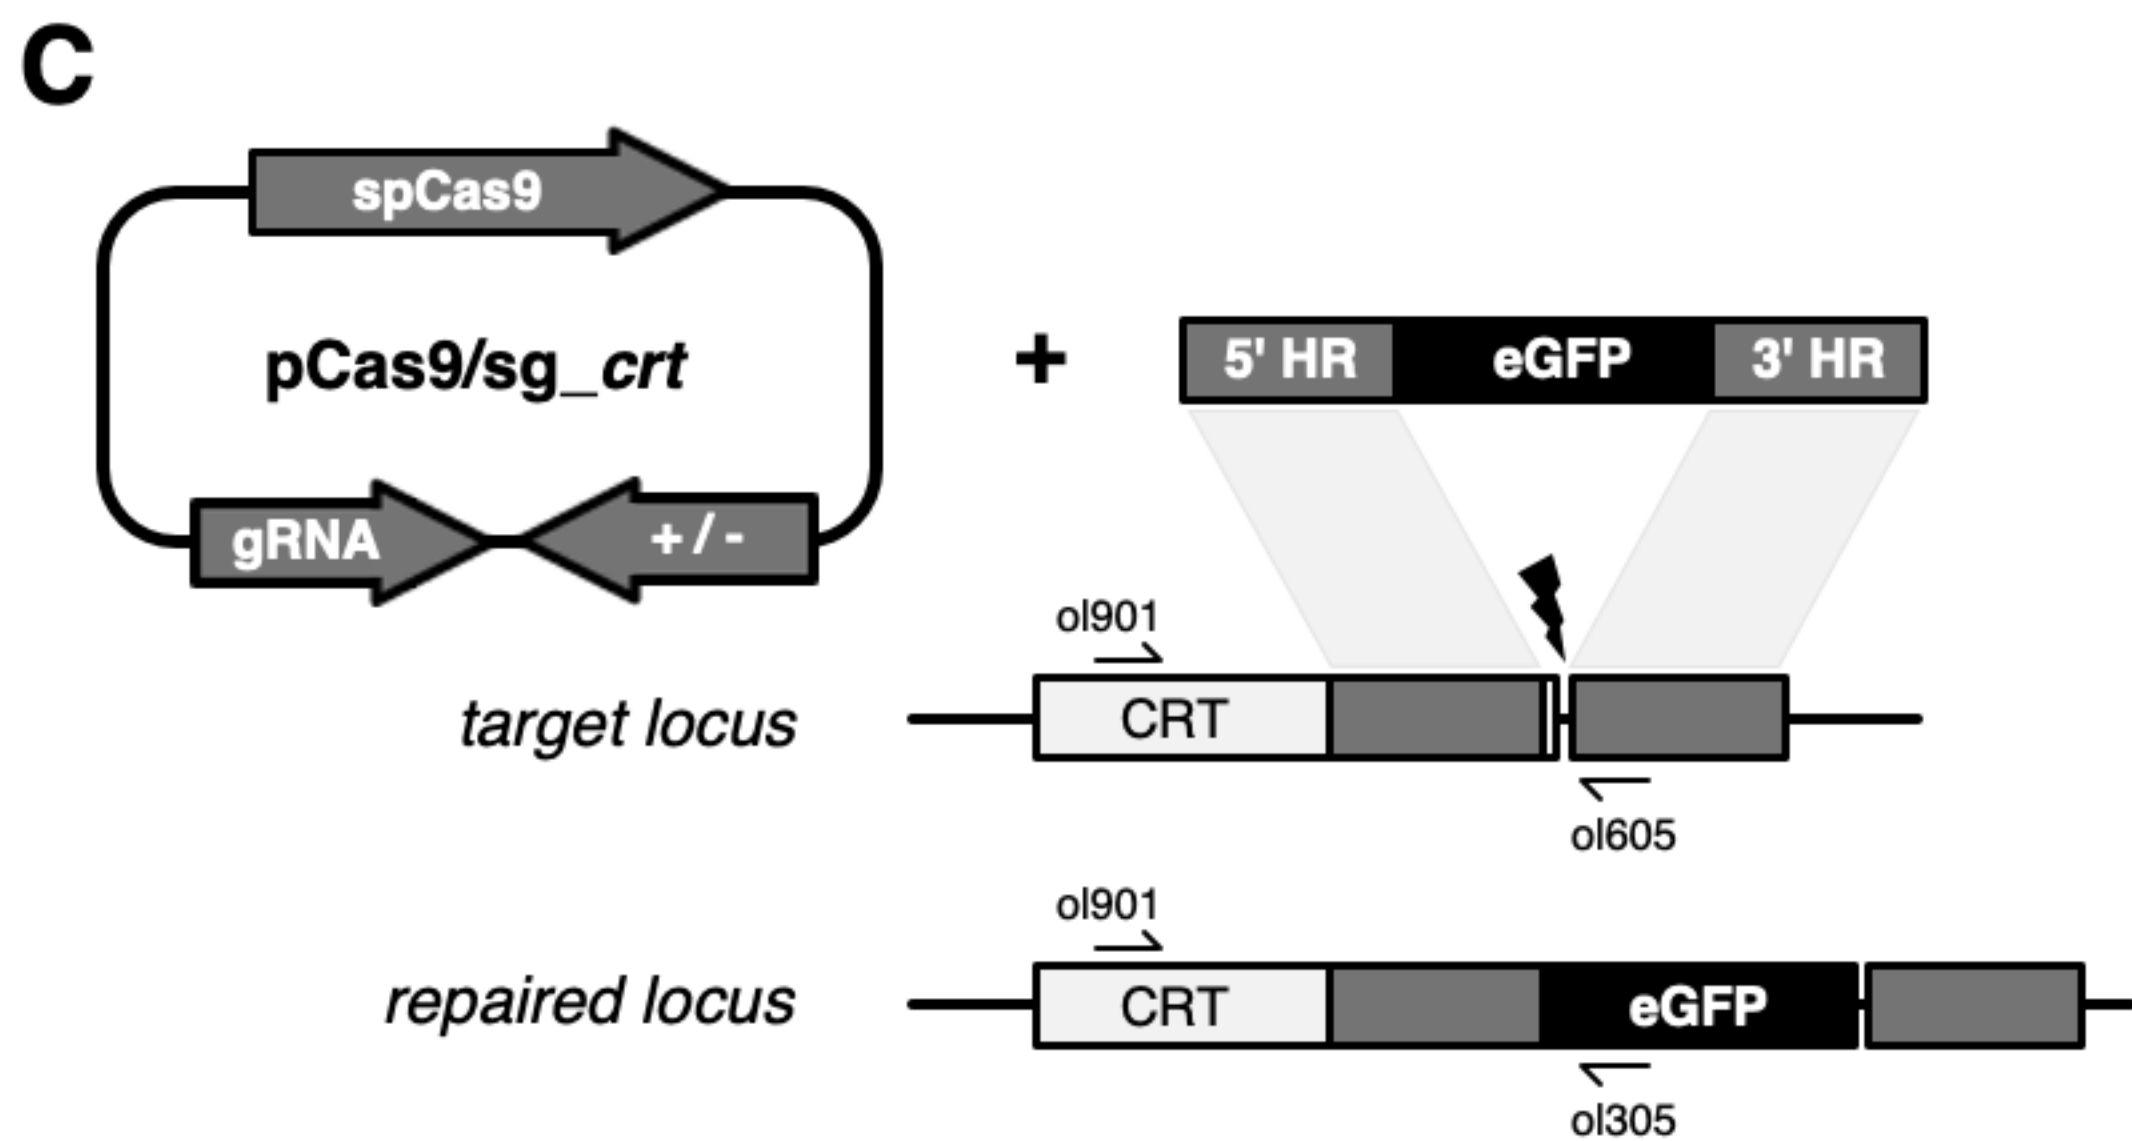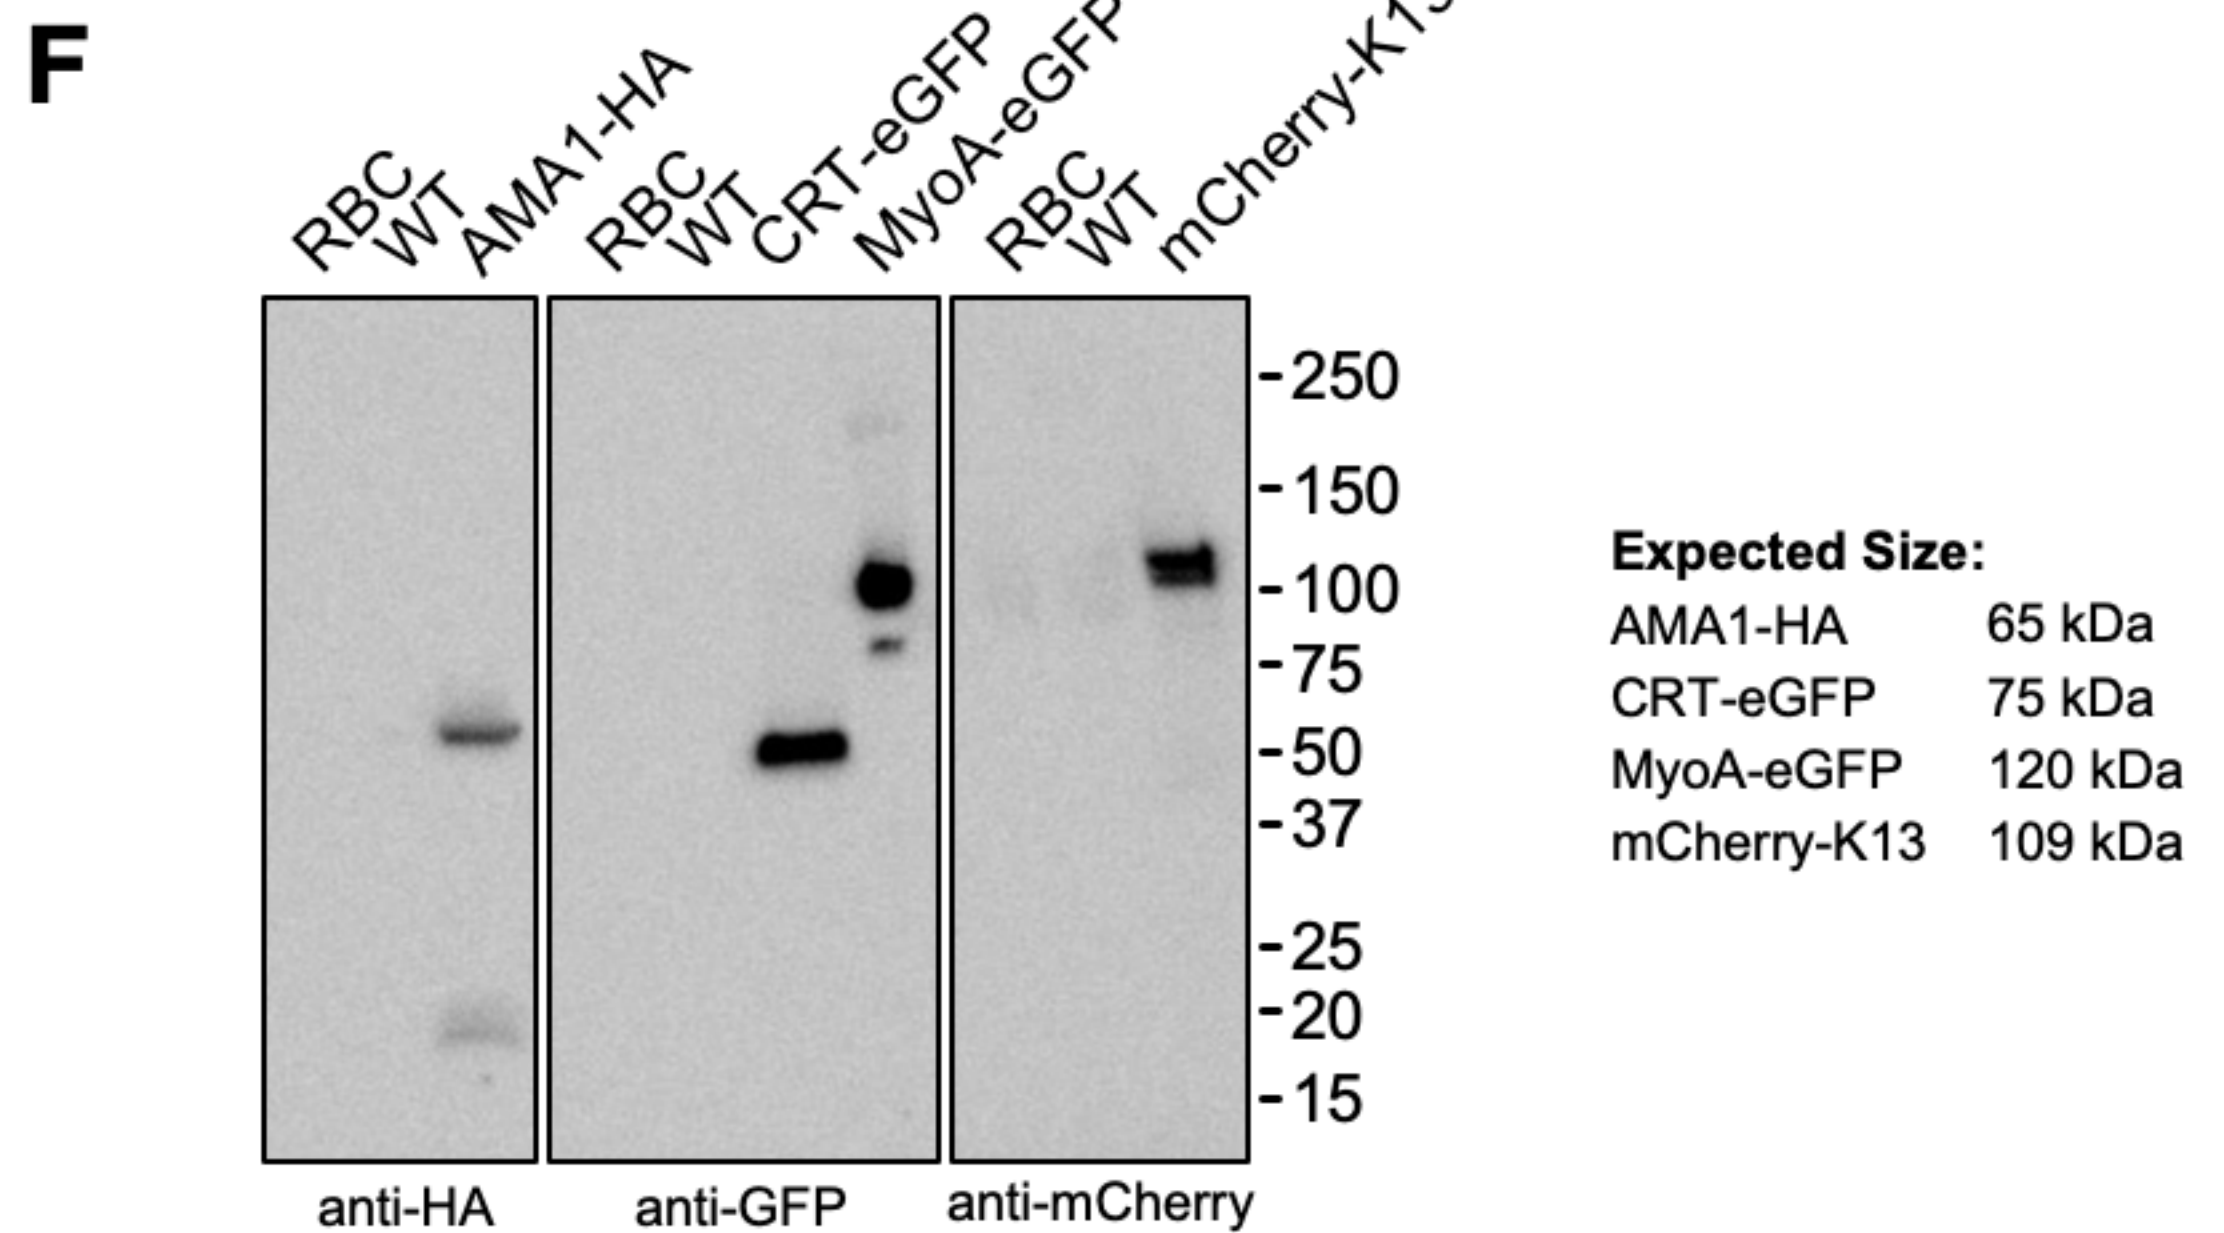



888 **Figure S3: CRISPR-Cas9 tagging of *P. knowlesi* proteins**

889 (A) Schematic of CRISPR-Cas9 strategy. C-terminal integration of the hemagglutinin (HA) tag into the  
890 target AMA1 locus via homologous recombination. Arrows indicating oligo positions for diagnostic  
891 PCRs. (B) C-terminal integration of HA tag into the target RON2 locus. (C) C-terminal integration of  
892 eGFP into the target Chloroquine Resistance Transporter (CRT) locus. (D) C-terminal integration of  
893 eGFP into the target Myosin A locus. (E) N-terminal integration of mCherry into the target Kelch13  
894 (K13) locus. (F) Western blot showing expression of tagged proteins in *P. knowlesi* saponin-lysed  
895 schizonts separated by SDS-PAGE and immunoblotting with anti-HA, anti-GFP or anti-mCherry  
896 primary antibodies. Control samples are saponin-lysed red blood cells (RBC) and wild type parasite  
897 line. Expected sizes of bands are indicated. CRT runs faster than its expected band size as shown in *P.*  
898 *falciparum* previously.  
899

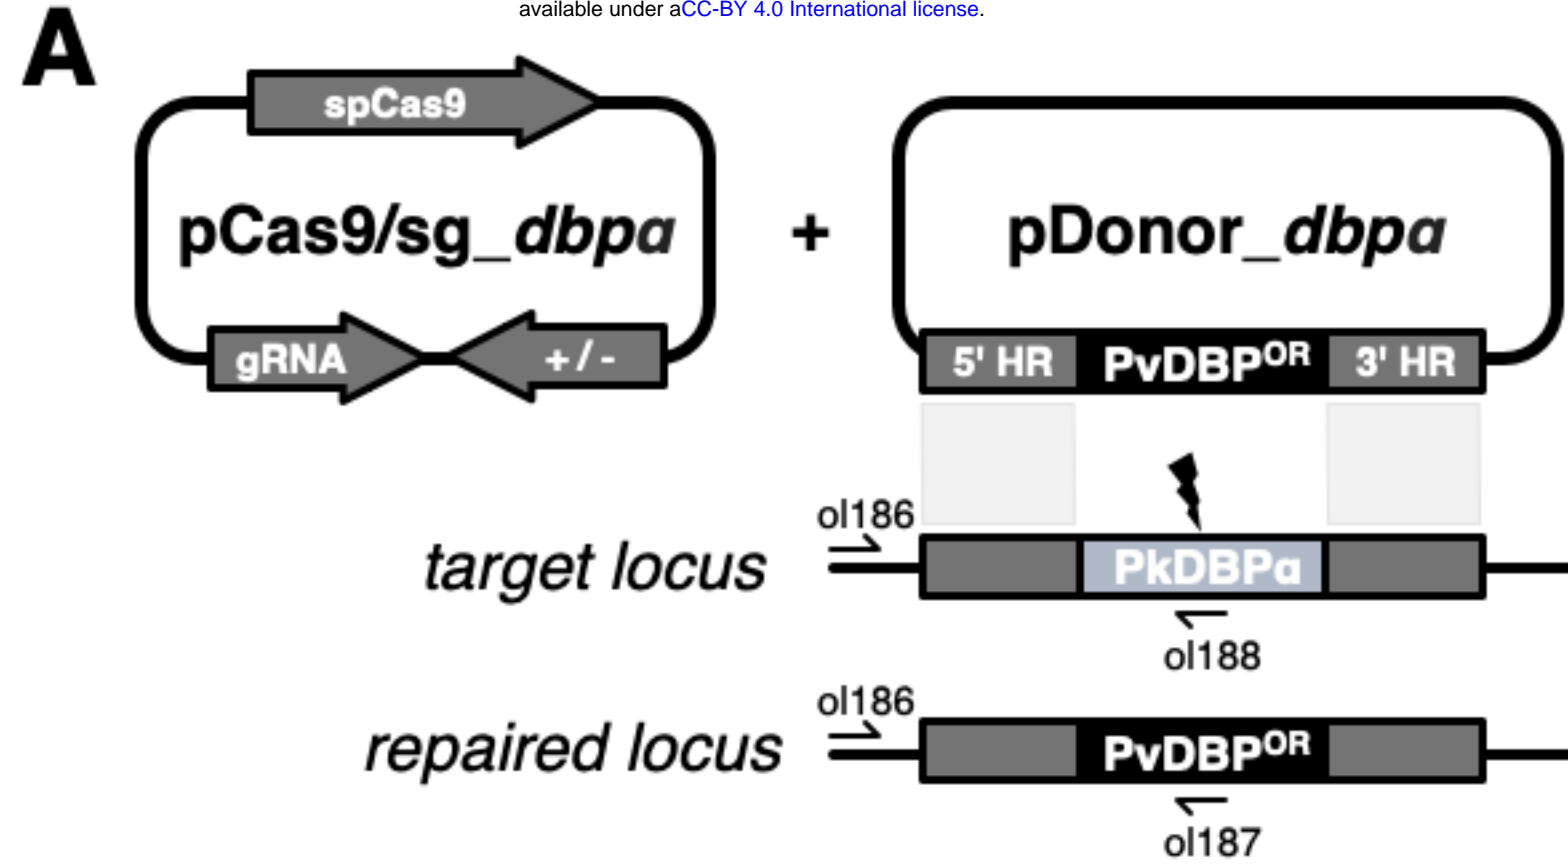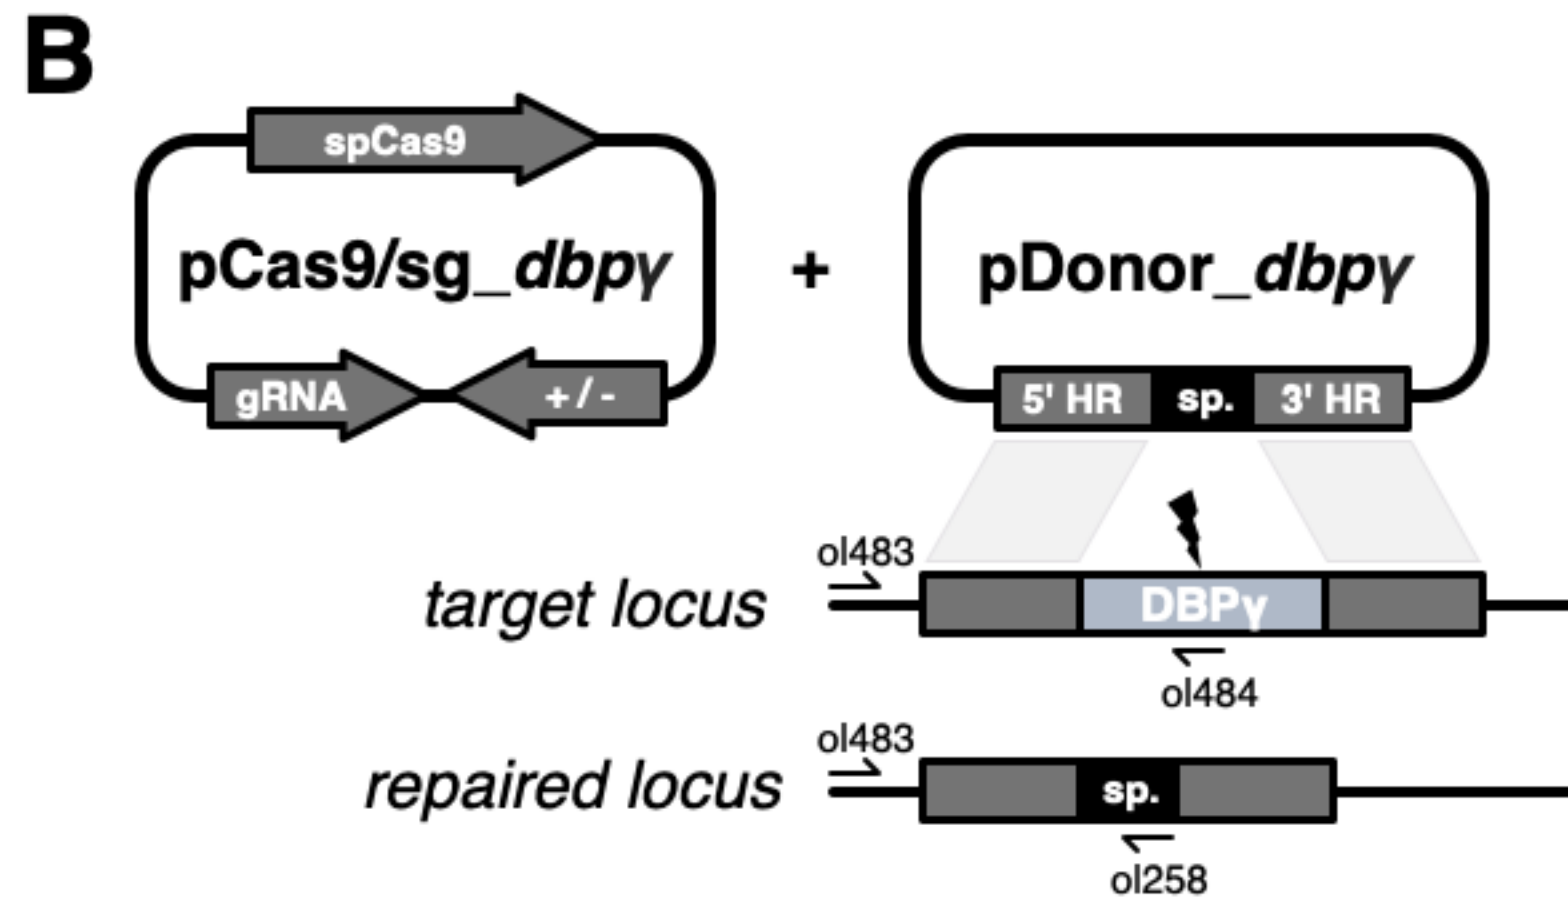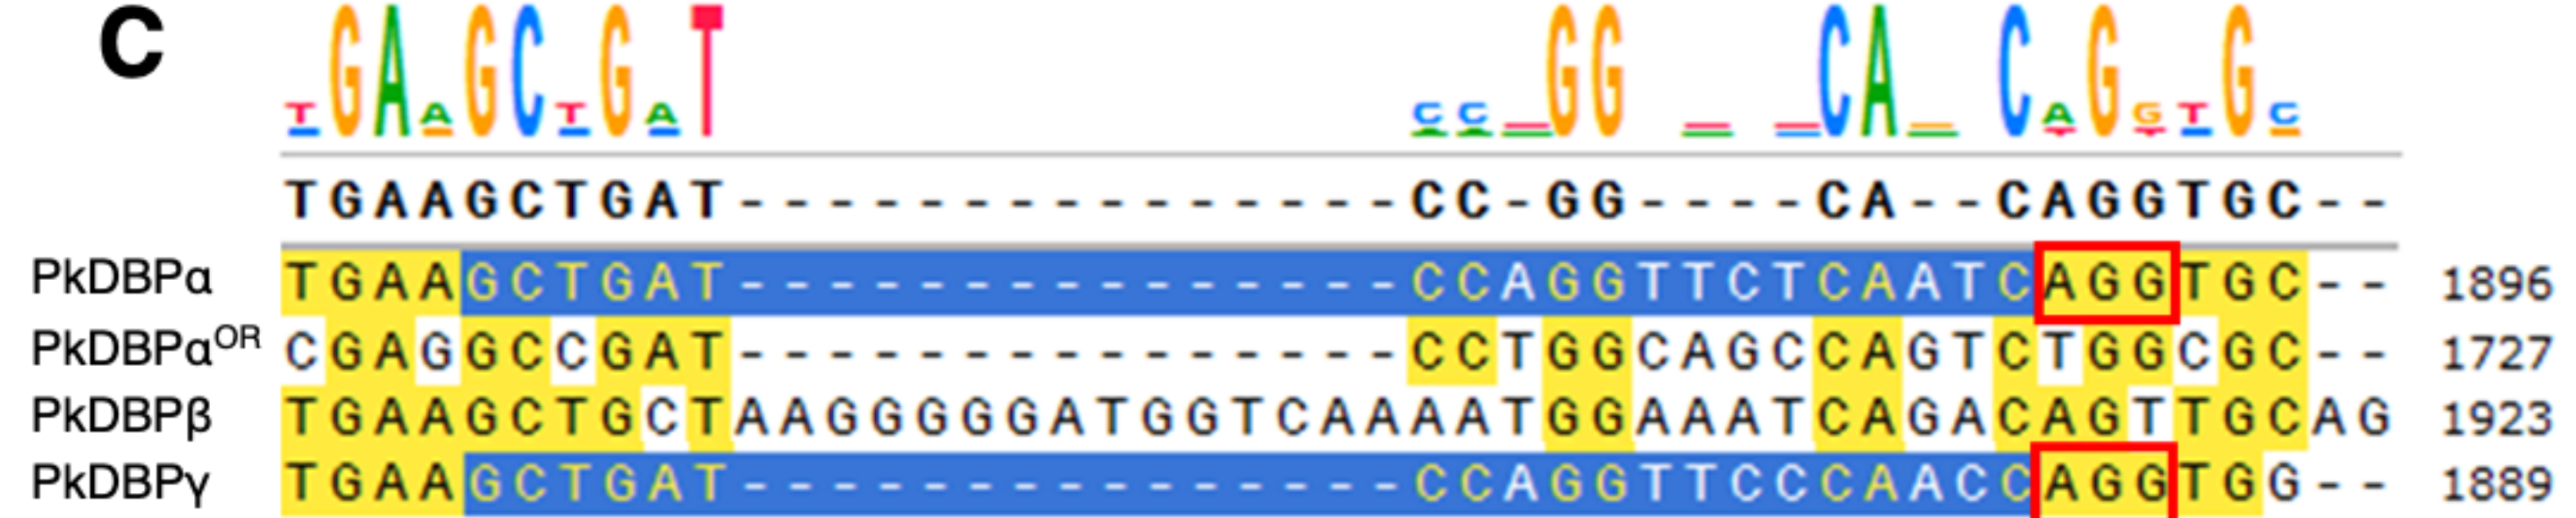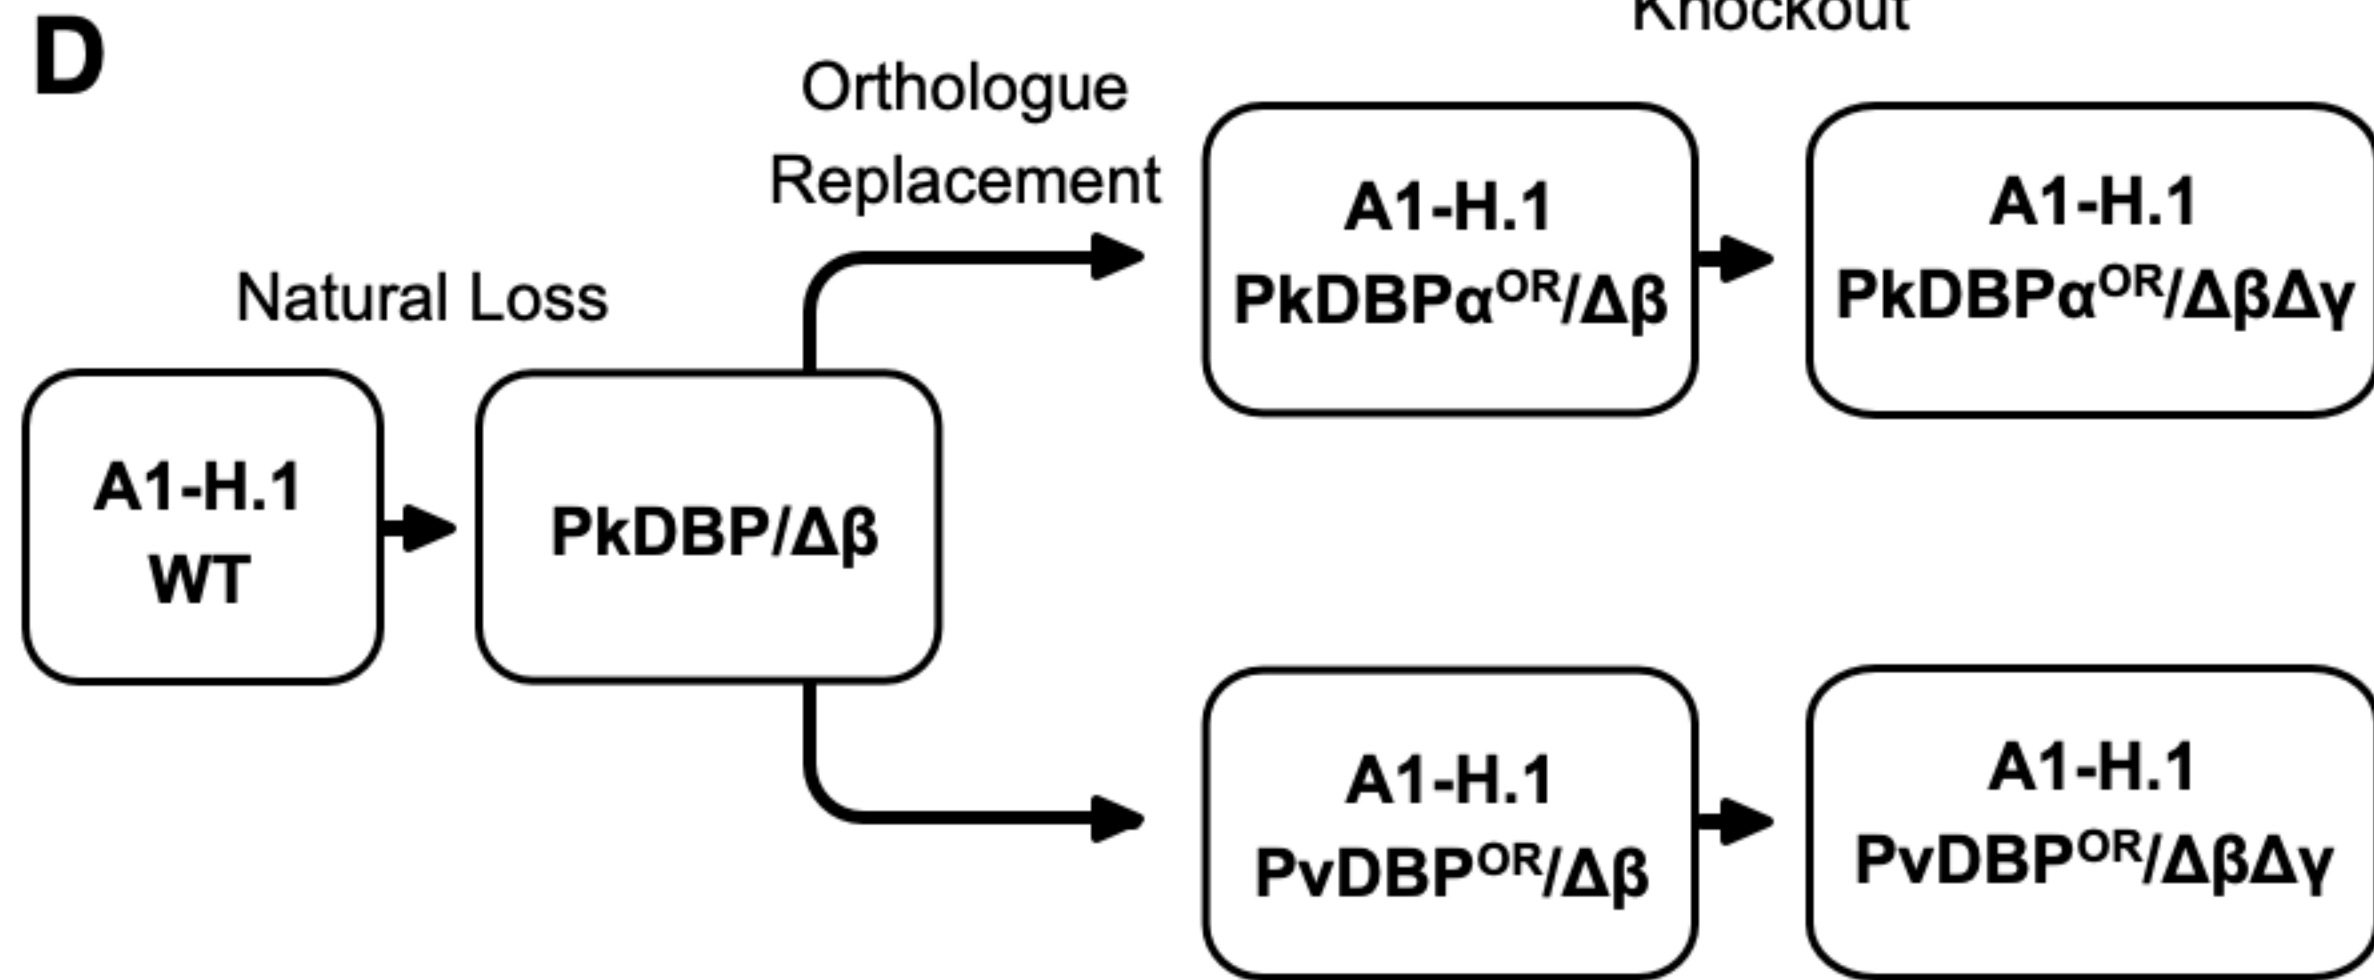

900 **Figure S4: Transgenic *P. knowlesi* DBP orthologue replacement and knockout design and**  
901 **genotypic analysis**

902 (A) Schematic of CRISPR-Cas9 strategy. Integration of the PvDBP into the target PkDBP $\alpha$  locus via  
903 homologous recombination. Arrows indicating oligo positions for diagnostic PCRs. (B) Integration of a  
904 spacer sequence into the target PkDBP $\gamma$  locus. (C) Nucleotide sequence alignment of PkDBP $\alpha$ ,  
905 PkDBP $\alpha^{OR}$ , PkDBP $\beta$  and PkDBP $\gamma$  guide sequences. The chosen guide sequences for transfections are  
906 highlighted in blue. PAM sites are highlighted in a red square (D) Flow chart indicating generated  
907 transgenic DBP parasite lines. Wild type parasites that naturally lost 44 kb at one end of chromosome  
908 14 were first edited by orthologous replacement of PkDBP $\alpha$  with the recodonised gene (PkDBP $\alpha^{OR}$ ) or  
909 *P. vivax* DBP (PvDBP $^{OR}$ ) and clonal lines established by limiting dilution cloning. Both clonal parasite  
910 lines were edited by knockout of PkDBP $\gamma$  (PkDBP $\alpha^{OR}/\Delta\beta\Delta\gamma$  and PvDBP $^{OR}/\Delta\beta\Delta\gamma$ ), which were cloned  
911 before use in invasion assays and assays of GIA.

912

913

### Chromosome 6

### Chromosome 14

### Chromosome 13

**A**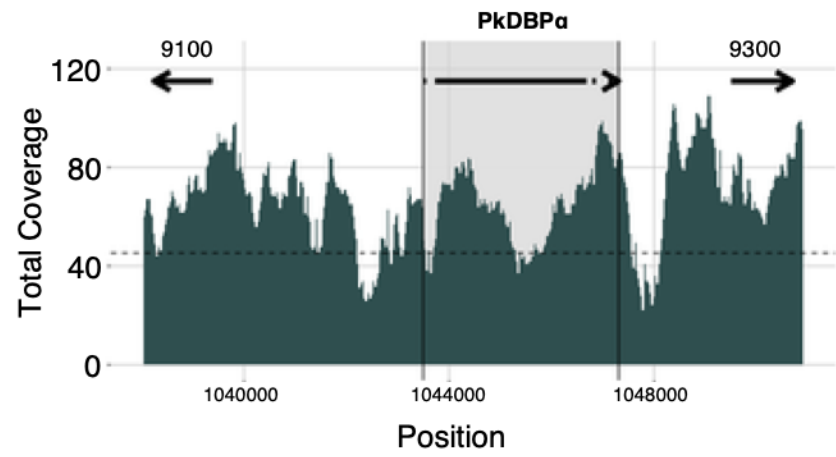**D**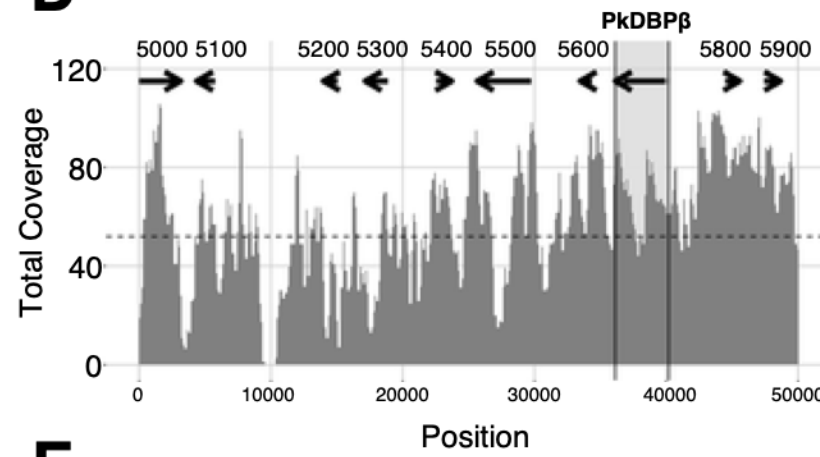**F**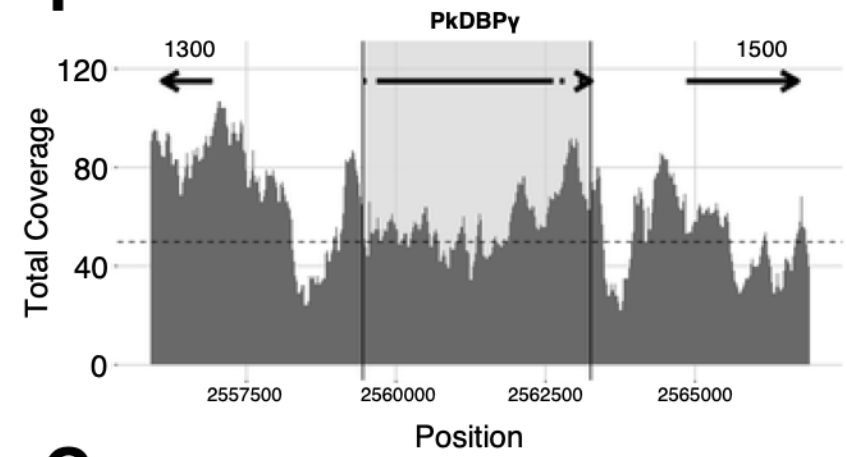**B**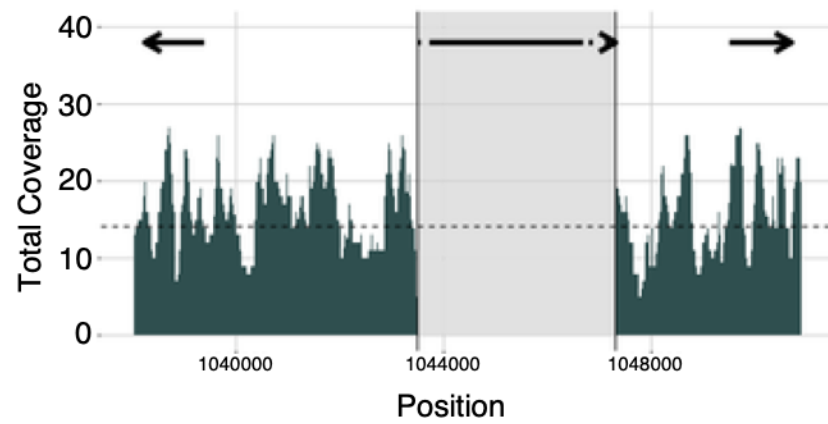**E**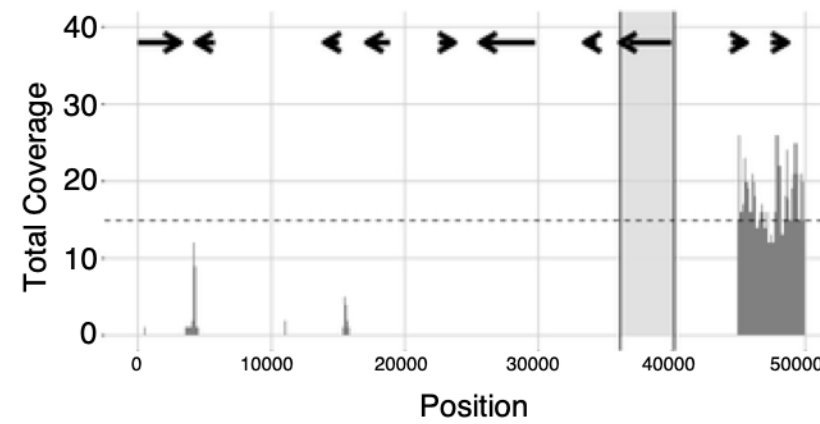**G**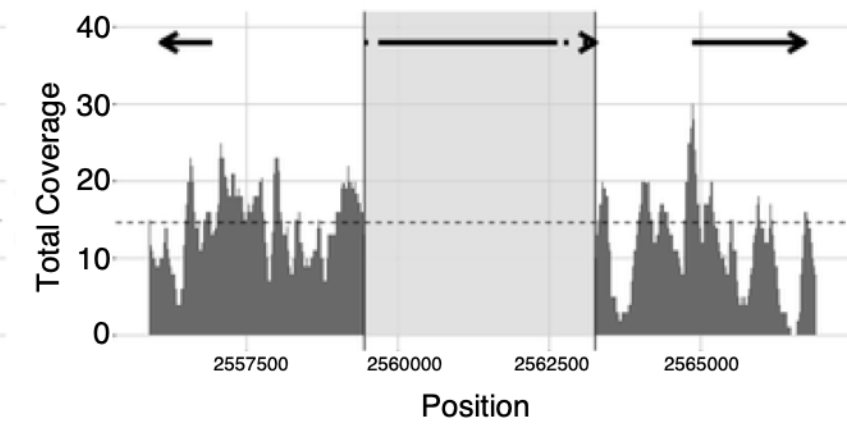**C**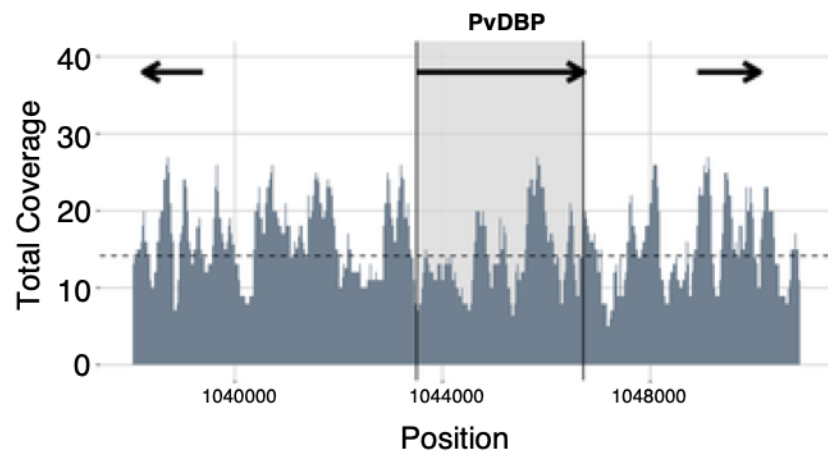

914 **Figure S5: Sequencing of PvDBP<sup>OR</sup>/ΔβΔγ parasite line**

915 Mapping of Illumina reads of PvDBP<sup>OR</sup>/ΔβΔγ against *P. knowlesi* strain A1-H.1 wild-type  
916 chromosomes (57). (A) PkDBPα locus on end of chromosome 6 of the A1-H.1 reference genome with  
917 flanking genes PKA1H\_060029100 and PKA1H\_060029300. (B) PvDBP<sup>OR</sup>/ΔβΔγ sequence mapped to  
918 A1-H.1 shows deletion of PkDBPα. (C) PvDBP<sup>OR</sup>/ΔβΔγ sequence mapped to a chimaeric A1-H.1  
919 reference genome, generated *in silico* by replacing PkDBPα with PvDBP, confirms successful  
920 orthologue replacement (D) PkDBPβ locus of the A1-H.1 reference genome with flanking genes on  
921 start of chromosome 14 with flanking genes from PKA1H\_140005000 to PKA1H\_140005900, (E)  
922 PvDBP<sup>OR</sup>/ΔβΔγ sequence mapped to A1-H.1 reveals a chromosome truncation of 44,921 bp, including  
923 loss of PkDBPβ and 8 other genes. (F) PkDBPγ locus on end of chromosome 13 of the A1-H.1  
924 reference genome with flanking genes PKA1H\_130061300 and PKA1H\_130061500. (G)  
925 PvDBP<sup>OR</sup>/ΔβΔγ sequence mapped to A1-H.1 shows deletion of DBPγ. Gene locations are indicated by  
926 arrows and last four digits of accession numbers are shown in the top panel above the arrows.

927 **Table S1: Comparison of *P. knowlesi* and *P. falciparum* 3D7 genes**

| Gene     | GC content for 5' and 3' HR regions |                      | PAM site crossing stop codon<br>(off-target score) |                         |
|----------|-------------------------------------|----------------------|----------------------------------------------------|-------------------------|
|          | <i>P. knowlesi</i>                  | <i>P. falciparum</i> | <i>P. knowlesi</i>                                 | <i>P. falciparum</i>    |
| AMA1     | 43% / 36 %                          | 30 % / 13%           | 2 sites                                            | 1 site (0.032)          |
| RON2     | 39 % / 36 %                         | 30 % / 13 %          | 3 sites                                            | no site                 |
| Myosin A | 41 % / 38 %                         | 29 % / 15 %          | 1 site (not used)                                  | no site                 |
| K13      | 34 % / 32 %                         | 8 % / 22 %           | 3 sites                                            | 2 sites, (0.057, 0.042) |
| CRT      | 40 % / 36 %                         | 19 % / 10 %          | 1 site                                             | no site                 |

928

929 **Table S2: off-target scores of guide sequences for PkDBP $\alpha$  sgRNA**

| GeneID     | guide                    | PAM | Miss-matches | Score |                                                    |
|------------|--------------------------|-----|--------------|-------|----------------------------------------------------|
| PKH_062300 | GCTGATCCAGGTTC<br>TCAATC | AGG | 0.0          | inf   | DBP $\alpha$                                       |
| PKH_134580 | GCTGATCCAGGTTC<br>CCAACC | AGG | 2.0          | 0.021 | DBP $\gamma$                                       |
| PKH_125100 | TGTGATCAATCTTC<br>TCAATC | AAG | 5.0          | 0.020 | hemolysin III,<br>putative                         |
| PKH_101770 | TACCATCCAGGTTC<br>TCCATC | GAG | 5.0          | 0.015 | Conserved<br><i>Plasmodium</i> protein,<br>unknown |
| PKH_144490 | GATTTTCTATTTTCT<br>CAATC | AGG | 6.0          | 0.014 | Leucine-rich repeat<br>protein                     |

930

931 **Table S3: Guide sequences**

| PlasmoDB ID      | Gene-modification | guide                    | On-target score | Off-target score | Diagnostic PCR | Microscopy |
|------------------|-------------------|--------------------------|-----------------|------------------|----------------|------------|
| PKNH_041220<br>0 | <i>P230p</i> with | CCTGTAGTGGCAGAGCACC<br>A | 0.63            | 0.008            | +              | +          |

|                  | eGFP cassette              |                           |      |       |   |     |
|------------------|----------------------------|---------------------------|------|-------|---|-----|
| PKNH_093150<br>0 | AMA1-HA                    | GAGAAGCCTTACTACTGAG<br>T  | 0.58 | 0.007 | + | +   |
| PKNH_123010<br>0 | RON2-HA                    | TACGCCCGCATAACAGATGT<br>A | 0.54 | 0.015 | + | +   |
| PKNH_010760<br>0 | CRT-eGFP                   | TCATTGTGTTATTATCGATT      | 0.45 | 0.011 | + | +   |
| PKNH_125880<br>0 | Myosin A-eGFP              | TCAGGGTCCAGGCCACAT<br>A   | 0.49 | 0.021 | + | +   |
| PKNH_125770<br>0 | mCherry-K13                | CCGAGGTGAATAACAAT<br>GG   | 0.69 | 0.022 | + | +   |
| PKNH_062350<br>0 | DBP $\alpha$ <sup>OR</sup> | GCTGATCCAGGTTCTCAAT<br>C  | 0.49 | 0.021 | + | N/A |
| PKNH_135690<br>0 | DBP $\gamma$ k.o.          | CATGCAACAATTTACACCC<br>C  | 0.52 | 0.019 | + | N/A |

932

933 Table S7: Fold replication of parasites lines in a FACS-based invasion assays over one growth cycle (24 h).  
934 Dataset of Fig 4B.

|                                                          | hRBC |       |   | mRBC |       |   |
|----------------------------------------------------------|------|-------|---|------|-------|---|
|                                                          | Mean | SD    | N | Mean | SD    | N |
| WT                                                       | 4.32 | 0.605 | 8 | 5.48 | 1.067 | 3 |
| PkDBP $\alpha$ <sup>OR</sup> / $\Delta\beta$             | 5.95 | 0.983 | 7 | 7.90 | 0.740 | 3 |
| PvDBP <sup>OR</sup> / $\Delta\beta$                      | 5.03 | 0.797 | 8 | 5.83 | 0.994 | 3 |
| PkDBP $\alpha$ <sup>OR</sup> / $\Delta\beta\Delta\gamma$ | 6.04 | 0.885 | 8 | 8.70 | 1.048 | 3 |
| PvDBP <sup>OR</sup> / $\Delta\beta\Delta\gamma$          | 4.79 | 1.079 | 8 | 3.58 | 2.050 | 3 |

935

936 Table S8: Growth inhibition activity (GIA, %). Dataset of Fig 4C.

|  | anti-DARC [1.5 $\mu$ g/mL] |    |   | anti-DARC [3 $\mu$ g/mL] |    |   | anti-PkMSP1 <sub>19</sub> IgG [2.5 mg/mL] |    |   | anti-PkMSP1 <sub>19</sub> IgG [5 mg/mL] |    |   |
|--|----------------------------|----|---|--------------------------|----|---|-------------------------------------------|----|---|-----------------------------------------|----|---|
|  | Mean                       | SD | N | Mean                     | SD | N | Mean                                      | SD | N | Mean                                    | SD | N |



|                                             |       |       |   |       |       |   |       |       |   |       |       |   |
|---------------------------------------------|-------|-------|---|-------|-------|---|-------|-------|---|-------|-------|---|
| PkDBP $\alpha^{OR}/\Delta\beta$             | 44.23 | 5.041 | 3 | 71.58 | 3.165 | 3 | 34.92 | 5.429 | 3 | 64.48 | 7.749 | 3 |
| PkDBP $\alpha^{OR}/\Delta\beta\Delta\gamma$ | 40.82 | 4.627 | 3 | 70.30 | 6.875 | 3 | 38.06 | 3.597 | 3 | 76.01 | 4.813 | 3 |
| PvDBP $^{OR}/\Delta\beta$                   | 42.24 | 3.980 | 3 | 68.27 | 4.360 | 3 | 34.89 | 5.343 | 3 | 66.64 | 3.491 | 3 |
| PvDBP $^{OR}/\Delta\beta\Delta\gamma$       | 44.98 | 4.579 | 3 | 67.44 | 4.289 | 3 | 38.65 | 4.997 | 3 | 66.67 | 2.880 | 3 |

937

938 Table S9: Growth inhibition activity (GIA, %) against parasite line PkDBP $\alpha^{OR}/\Delta\beta$ . Dataset of Fig 4D.

| Concentration (mg/ml) | Rabbit PI IgG |       |   | Rabbit antiPvDBP_RII |       |   |
|-----------------------|---------------|-------|---|----------------------|-------|---|
|                       | Mean          | SD    | N | Mean                 | SD    | N |
| 10                    | 11.57         | 2.015 | 5 | 30.72                | 3.382 | 5 |
| 5                     | 3.64          | 3.463 | 5 | 21.45                | 2.873 | 5 |
| 2.5                   | 2.35          | 2.912 | 5 | 16.46                | 3.362 | 5 |
| 1.25                  | 0.72          | 4.165 | 5 | 11.31                | 2.453 | 5 |
| 0.6                   | -1.27         | 1.870 | 5 | 7.94                 | 2.588 | 5 |
| 0.3                   | -1.63         | 4.562 | 5 | 3.27                 | 2.366 | 5 |
| 0.15                  | -1.79         | 3.200 | 5 | 2.93                 | 4.330 | 5 |
| 0.075                 | -4.84         | 2.939 | 5 | -1.36                | 3.236 | 5 |

939

940 Table S10: Growth inhibition activity (GIA, %) against parasite line PvDBP $^{OR}/\Delta\beta$ . Dataset of Fig 4E.

| Concentration (mg/ml) | Rabbit PI IgG |       |   | Rabbit antiPvDBP_RII |       |   |
|-----------------------|---------------|-------|---|----------------------|-------|---|
|                       | Mean          | SD    | N | Mean                 | SD    | N |
| 10                    | 20.03         | 3.026 | 5 | 76.76                | 5.219 | 5 |
| 5                     | 10.80         | 3.444 | 5 | 53.83                | 4.623 | 5 |
| 2.5                   | 3.34          | 2.749 | 5 | 29.58                | 3.332 | 5 |
| 1.25                  | 1.08          | 2.051 | 5 | 18.99                | 3.367 | 5 |
| 0.6                   | 0.47          | 2.963 | 5 | 13.61                | 4.163 | 5 |
| 0.3                   | -0.76         | 3.011 | 5 | 11.68                | 2.352 | 5 |
| 0.15                  | -1.71         | 3.709 | 5 | 7.46                 | 2.428 | 5 |
| 0.075                 | -3.39         | 2.554 | 5 | -0.98                | 1.804 | 5 |

941

942 Table S11: Growth inhibition activity (GIA, %) against parasite line PkDBP $\alpha^{OR}/\Delta\beta\Delta\gamma$ . Dataset of Fig 4F.

| Concentration (mg/ml) | Rabbit PI IgG |       |   | Rabbit antiPvDBP_RII |       |   |
|-----------------------|---------------|-------|---|----------------------|-------|---|
|                       | Mean          | SD    | N | Mean                 | SD    | N |
| 10                    | 28.70         | 2.828 | 6 | 14.18                | 3.589 | 6 |
| 5                     | 20.31         | 2.385 | 6 | 4.34                 | 3.060 | 6 |
| 2.5                   | 15.45         | 2.723 | 6 | 3.17                 | 2.337 | 6 |
| 1.25                  | 10.96         | 2.270 | 6 | 0.32                 | 1.661 | 6 |
| 0.6                   | 7.39          | 3.215 | 6 | -0.03                | 2.501 | 6 |
| 0.3                   | 5.90          | 3.156 | 6 | -2.28                | 2.374 | 6 |
| 0.15                  | 3.05          | 3.498 | 6 | -1.21                | 1.559 | 6 |

|       |      |       |   |       |       |   |
|-------|------|-------|---|-------|-------|---|
| 0.075 | 0.90 | 2.428 | 6 | -0.77 | 2.185 | 6 |
|-------|------|-------|---|-------|-------|---|

943

944 Table S12: Growth inhibition activity (GIA, %) against parasite line PvDBP<sup>OR</sup>/ΔβΔγ. Dataset of Fig 4G.

| Concentration (mg/ml) | Rabbit PI IgG |       |   | Rabbit antiPvDBP RII |       |   |
|-----------------------|---------------|-------|---|----------------------|-------|---|
|                       | Mean          | SD    | N | Mean                 | SD    | N |
| 10                    | 75.12         | 4.202 | 6 | 22.33                | 3.037 | 6 |
| 5                     | 50.96         | 2.753 | 6 | 14.69                | 3.371 | 6 |
| 2.5                   | 24.58         | 2.697 | 6 | 10.01                | 2.727 | 6 |
| 1.25                  | 17.85         | 2.752 | 6 | 7.21                 | 3.096 | 6 |
| 0.6                   | 15.21         | 3.014 | 6 | 1.31                 | 2.945 | 6 |
| 0.3                   | 11.38         | 2.324 | 6 | 0.76                 | 2.255 | 6 |
| 0.15                  | 4.46          | 1.767 | 6 | 0.19                 | 1.971 | 6 |
| 0.075                 | 0.55          | 2.666 | 6 | -3.00                | 2.888 | 6 |

945
